# Supplementary material
Source: PubMed Central journal article supplement (PMC7532939)

*Supporting information for*

**A Tetramer Derived from Islet Amyloid Polypeptide**

Yilin Wang, Adam G. Kreutzer, Nicholas L. Truex, and James S. Nowick\*

*Department of Chemistry, University of California, Irvine, Irvine, CA 92697-2025*

\*To whom correspondence should be addressed: jsnowick@uci.edu

**I. SUPPLEMENTARY FIGURES AND TABLE**

|           |                                                                                                                                                                                               |    |
|-----------|-----------------------------------------------------------------------------------------------------------------------------------------------------------------------------------------------|----|
| Fig. S1.  | <sup>1</sup> H NMR spectra of peptide <b>1<sub>Arg</sub></b> at various concentrations in 50 mM CD <sub>3</sub> COOD and 50 mM CD <sub>3</sub> COONa in D <sub>2</sub> O at 500 MHz and 298 K | S3 |
| Fig. S2.  | <sup>1</sup> H NMR spectra of peptide <b>1<sub>Cit</sub></b> at various concentrations in 50 mM CD <sub>3</sub> COOD and 50 mM CD <sub>3</sub> COONa in D <sub>2</sub> O at 500 MHz and 298 K | S4 |
| Fig. S3.  | Downfield shifting of the α-protons of peptide <b>1<sub>Arg</sub></b> relative to those of random coil chemical shifts at 4 mM.                                                               | S5 |
| Fig. S4.  | Downfield shifting of the α-protons of peptide <b>1<sub>Cit</sub></b> relative to those of random coil chemical shifts at 16 mM.                                                              | S5 |
| Fig. S5.  | Tetramer structure of peptide <b>1<sub>Cit</sub></b> generated in MacroModel with the MMFFs force field with GB/SA water solvation.                                                           | S6 |
| Table S1. | Crystallographic properties, crystallization conditions, data collection, and model refinement statistics for peptide <b>1<sub>Cit</sub></b> .                                                | S7 |

|                                                                                  |     |
|----------------------------------------------------------------------------------|-----|
| <b>II. CHARACTERIZATION DATA</b>                                                 | S8  |
| Macrocyclic $\beta$ -Sheet Peptide <b>1<sub>Arg</sub></b>                        |     |
| HPLC trace                                                                       | S9  |
| mass spectrum                                                                    | S9  |
| 1D $^1\text{H}$ NMR spectrum at 4mM in D <sub>2</sub> O at 500 MHz and 298 K     | S10 |
| 2D TOCSY spectrum at 4mM in D <sub>2</sub> O at 500 MHz and 298 K                | S16 |
| 2D ROESY spectrum at 4mM in D <sub>2</sub> O at 500 MHz and 298 K                | S18 |
| 2D DOSY spectrum at 4mM in D <sub>2</sub> O at 500 MHz and 298 K                 | S20 |
| Macrocyclic $\beta$ -Sheet Peptide <b>1<sub>Cit</sub></b>                        |     |
| HPLC trace                                                                       | S21 |
| mass spectrum                                                                    | S21 |
| 1D $^1\text{H}$ NMR spectrum at 2.0 mM in D <sub>2</sub> O at 500 MHz and 298 K  | S23 |
| 2D TOCSY spectrum at 2.0 mM in D <sub>2</sub> O at 500 MHz and 298 K             | S28 |
| 2D ROESY spectrum at 2.0 mM in D <sub>2</sub> O at 500 MHz and 298 K             | S30 |
| 1D $^1\text{H}$ NMR spectrum at 16.0 mM in D <sub>2</sub> O at 500 MHz and 298 K | S32 |
| 2D TOCSY spectrum at 16.0 mM in D <sub>2</sub> O at 500 MHz and 298 K            | S38 |
| 2D NOESY spectrum at 16.0 mM in D <sub>2</sub> O at 500 MHz and 298 K            | S42 |
| 2D DOSY spectrum at 1.0 mM in D <sub>2</sub> O at 500 MHz and 298 K              | S46 |
| 2D DOSY spectrum at 2.0 mM in D <sub>2</sub> O at 500 MHz and 298 K              | S47 |
| 2D DOSY spectrum at 4.0 mM in D <sub>2</sub> O at 500 MHz and 298 K              | S48 |
| 2D DOSY spectrum at 8.0 mM in D <sub>2</sub> O at 500 MHz and 298 K              | S49 |
| 2D DOSY spectrum at 16.0 mM in D <sub>2</sub> O at 500 MHz and 298 K             | S50 |
| Macrocyclic $\beta$ -Sheet Peptide <b>2<sub>Cit</sub></b>                        |     |
| HPLC trace                                                                       | S51 |
| mass spectrum                                                                    | S51 |
| 1D $^1\text{H}$ NMR spectrum at 1.0 mM in D <sub>2</sub> O at 500 MHz and 298 K  | S53 |



## I. SUPPLEMENTAL FIGURES

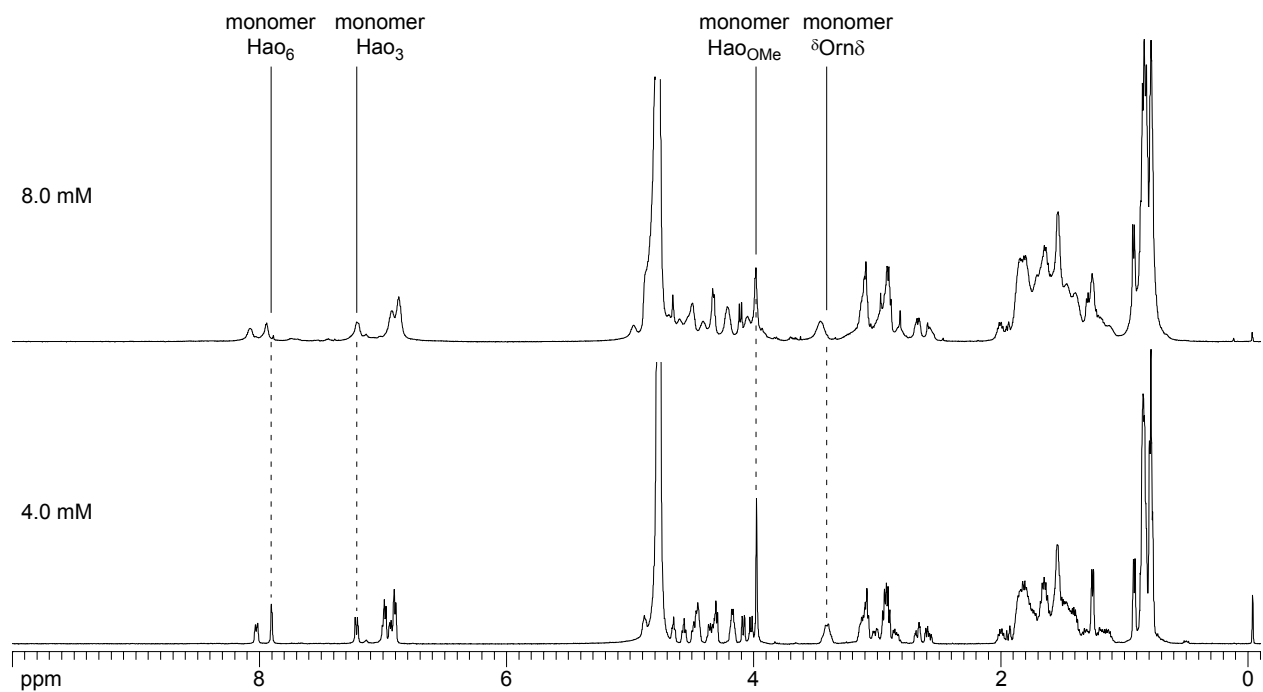

**Fig S1.**  $^1\text{H}$  NMR spectra of peptide  $\mathbf{1}_{\text{Arg}}$  at 4 mM and 8 mM in 50 mM  $\text{CD}_3\text{COOD}$  and 50 mM  $\text{CD}_3\text{COONa}$  buffer in  $\text{D}_2\text{O}$  at 500 MHz and 298 K.

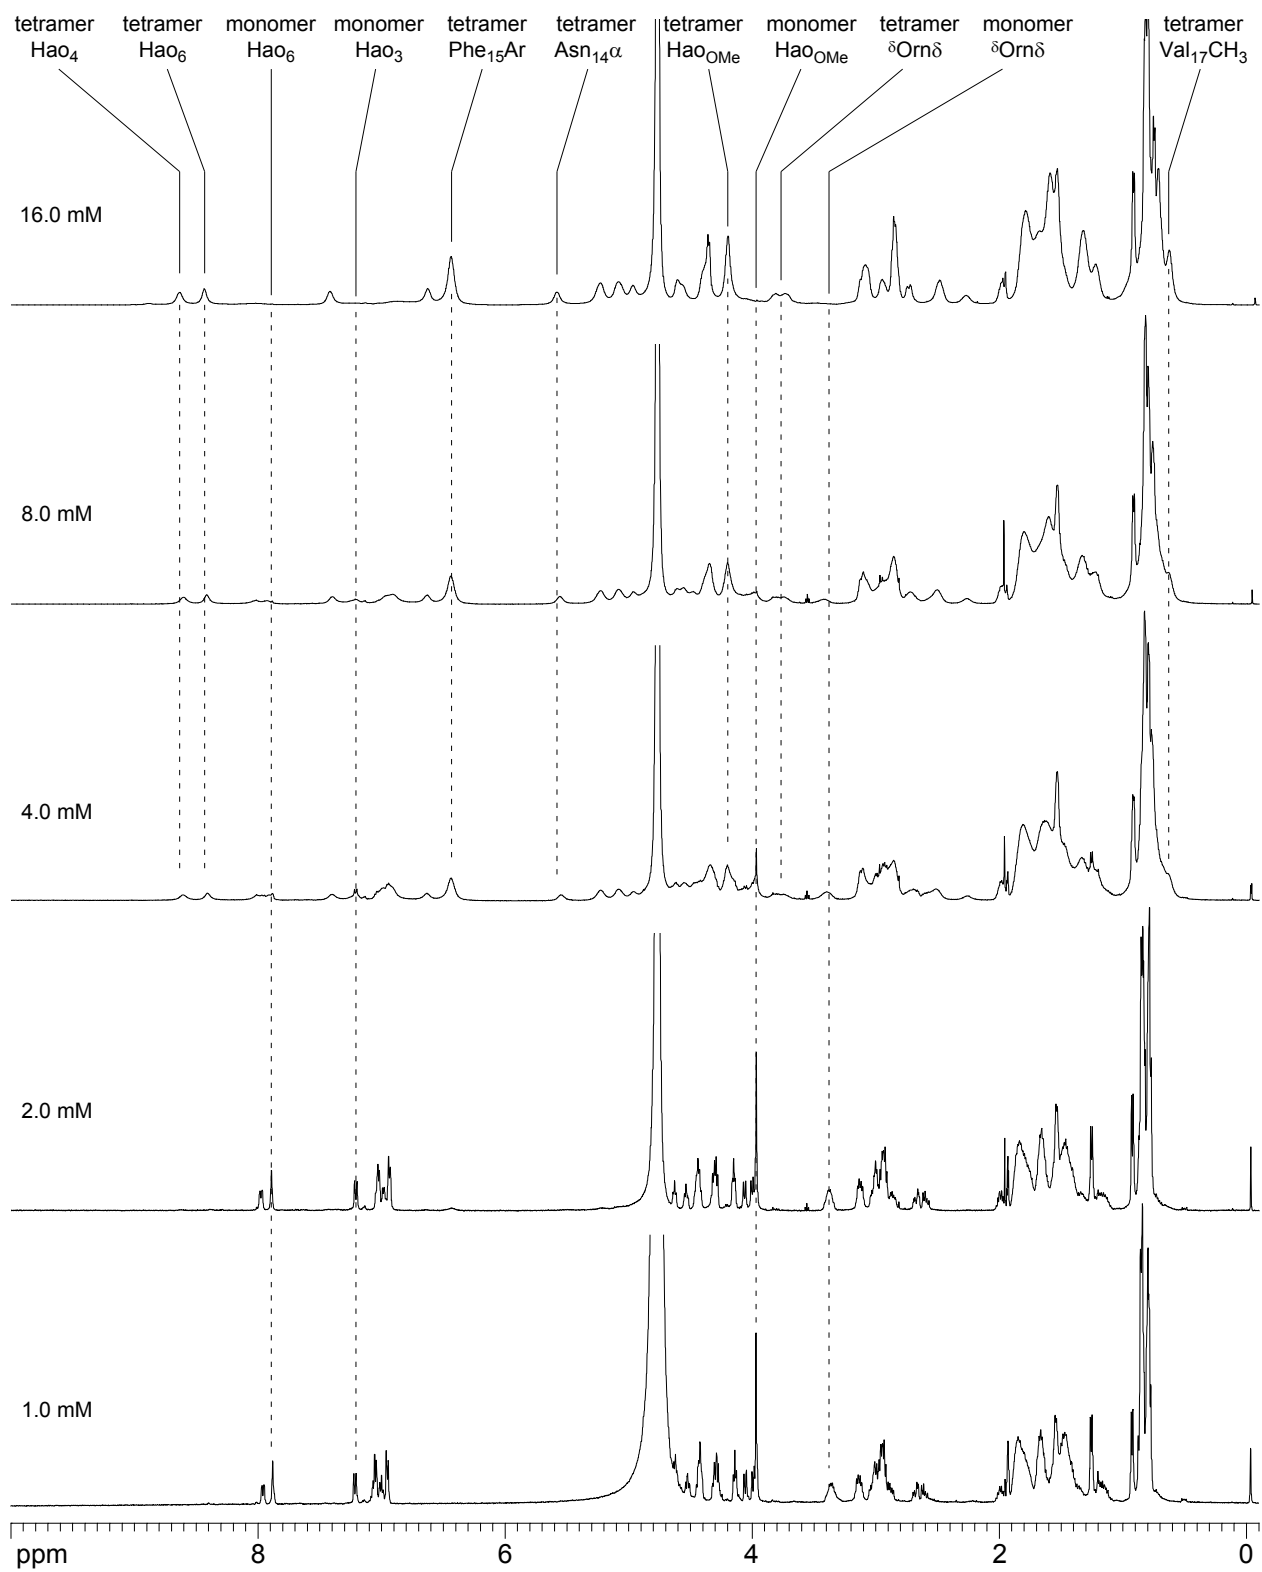

**Fig S2.**  $^1\text{H}$  NMR spectra of peptide **1<sub>Cit</sub>** at various concentrations in 50 mM  $\text{CD}_3\text{COOD}$  and 50 mM  $\text{CD}_3\text{COONa}$  in  $\text{D}_2\text{O}$  at 500 MHz and 298 K.

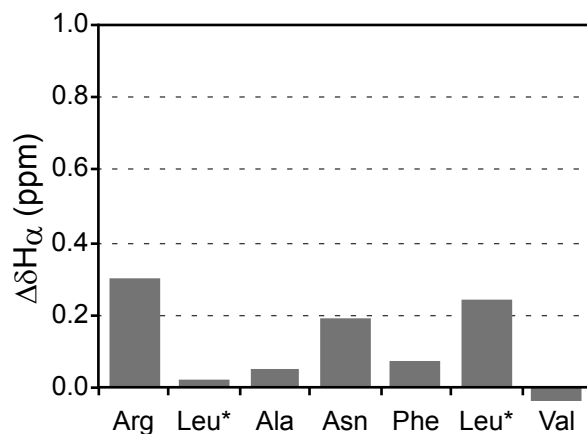

**Fig. S3.** Downfield shifting of the  $\alpha$ -protons of peptide  $\mathbf{1}_{\text{Arg}}$  at 4 mM relative to those of random coil chemical shifts. \*Leucine residues are not assigned in a sequence-specific fashion.

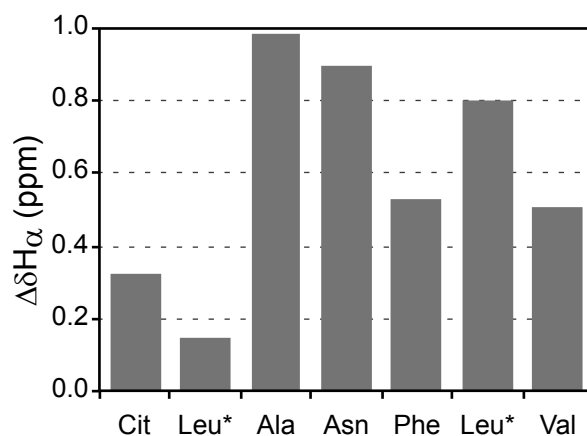

**Fig. S4.** Downfield shifting of the  $\alpha$ -protons of peptide  $\mathbf{1}_{\text{Cit}}$  at 16 mM relative to those of random coil chemical shifts. The random coil chemical shift of arginine was used for citrulline. \*Leucine residues are not assigned in a sequence-specific fashion.

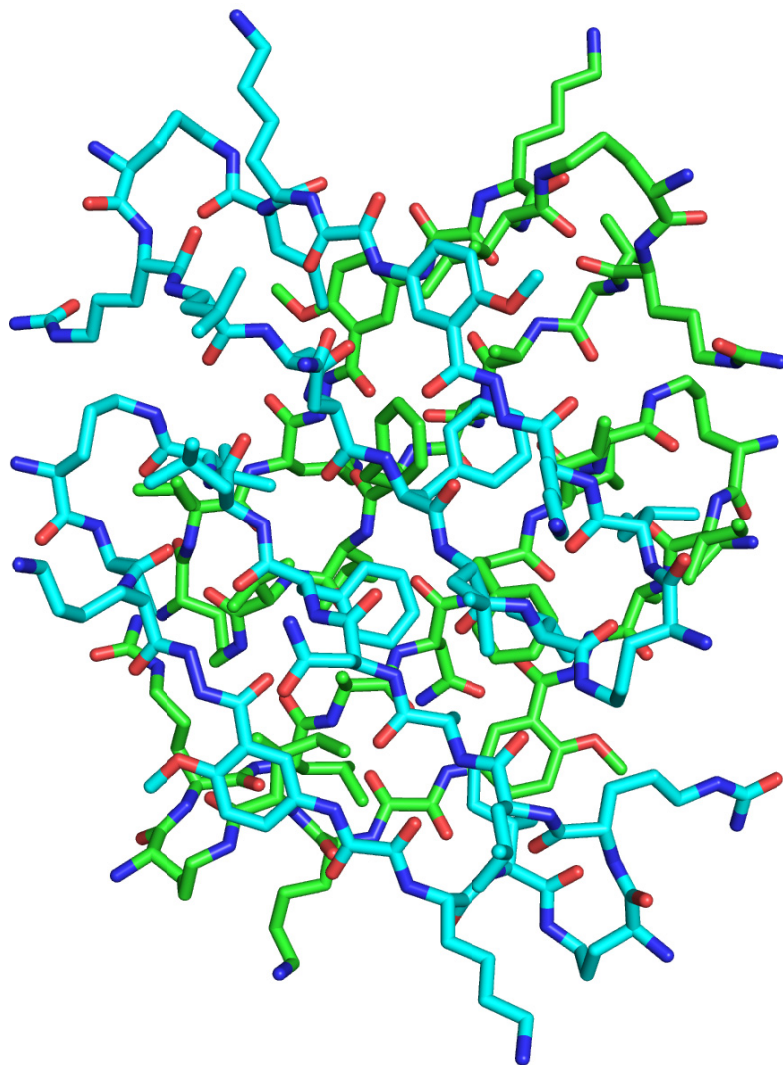

**Fig. S5.** Crystallographically based molecular model of the tetramer formed by peptide **1<sub>Cit</sub>**. The model was generated in MacroModel with the MMFFs force field with GB/SA water solvation.

**Table S1.** Crystallographic properties, crystallization conditions, data collection, and model refinement statistics for peptide **2<sub>Cit</sub>**.

| peptide                      | peptide <b>2<sub>Cit</sub></b>                                      |
|------------------------------|---------------------------------------------------------------------|
| PDB ID                       | 5UHR                                                                |
| space group                  | <i>P4<sub>1</sub>2<sub>1</sub>2</i>                                 |
| <i>a, b, c</i> (Å)           | 33.88, 33.88, 99.05                                                 |
| $\alpha, \beta, \lambda$ (°) | 90, 90, 90                                                          |
| peptides per asymmetric unit | 4                                                                   |
| crystallization conditions   | 0.1 M sodium citrate at pH 4.9, 20% (v/v) isopropanol, 18% PEG 4000 |
| wavelength (Å)               | 0.92                                                                |
| resolution (Å)               | 27.96–1.798 (1.862–1.798)                                           |
| total reflections            | 11672 (1079)                                                        |
| unique reflections           | 5838 (541)                                                          |
| multiplicity                 | 2.0 (2.0)                                                           |
| completeness (%)             | 99.51 (95.41)                                                       |
| mean $I/\sigma$              | 41.22 (9.47)                                                        |
| Wilson B factor              | 24.70                                                               |
| $R_{\text{merge}}$           | 0.01553 (0.06924)                                                   |
| $R_{\text{measure}}$         | 0.02196 (0.09792)                                                   |
| $CC_{1/2}$                   | 1.000 (0.988)                                                       |
| $CC^*$                       | 1.000 (0.997)                                                       |
| $R_{\text{work}}$            | 0.2257 (0.2928)                                                     |
| $R_{\text{free}}$            | 0.2687 (0.3045)                                                     |
| number of non-hydrogen atoms | 540                                                                 |
| $\text{RMS}_{\text{bonds}}$  | 0.020                                                               |
| $\text{RMS}_{\text{angles}}$ | 2.04                                                                |
| Ramachandran favored (%)     | 100                                                                 |
| outliers (%)                 | 0                                                                   |
| clashscore                   | 3.30                                                                |
| average B-factor             | 32.91                                                               |
| number of TLS groups         | 4                                                                   |
| ligands/ions                 | Cl (1)                                                              |
| water molecules              | 39                                                                  |

## **IV. CHARACTERIZATION DATA**

RP-HPLC of Macrocytic  $\beta$ -Sheet 1Arg

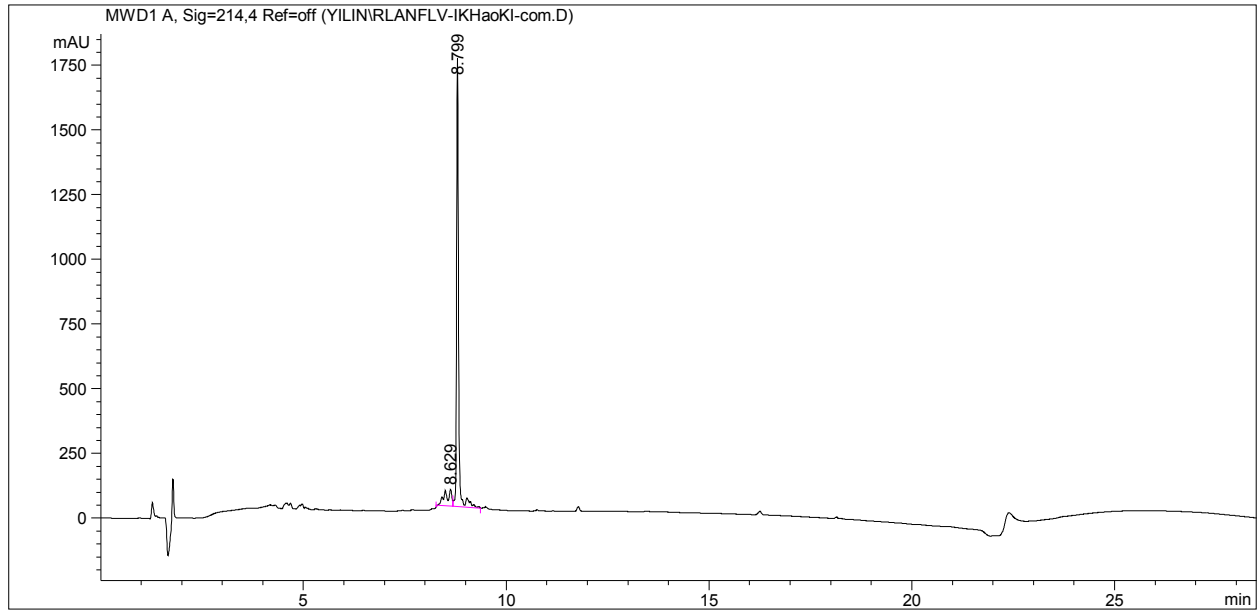

| Peak # | RetTime [min] | Type | Width [min] | Area mAU *s | Height [mAU] | Area %  |
|--------|---------------|------|-------------|-------------|--------------|---------|
| 1      | 8.629         | MF   | 0.1768      | 685.6629    | 64.6265      | 10.0330 |
| 2      | 8.799         | FM   | 0.0584      | 6148.4335   | 1756.0099    | 89.9670 |

**column:** Aeris XB-C18 2.6 $\mu$   
**dimensions:** 150 mm x 4.6 mm  
**mobile phase:** A: H<sub>2</sub>O, 0.1% TFA  
 B: CH<sub>3</sub>CN, 0.1% TFA  
**gradient:** A/B (95:5) to (0:100) in 20 min  
**flow rate:** 1.0 mL/min  
**detection:** VWD, wavelength = 214 nm  
**temperature:** 298 K

MS (ESI) of Macrocytic  $\beta$ -Sheet 1Arg

yilinw8-rianflv-ikhaoki-1 26 (0.477) Sm (Md, 3.00); Cm (2:55)

TOF MS ES+  
1.53e4

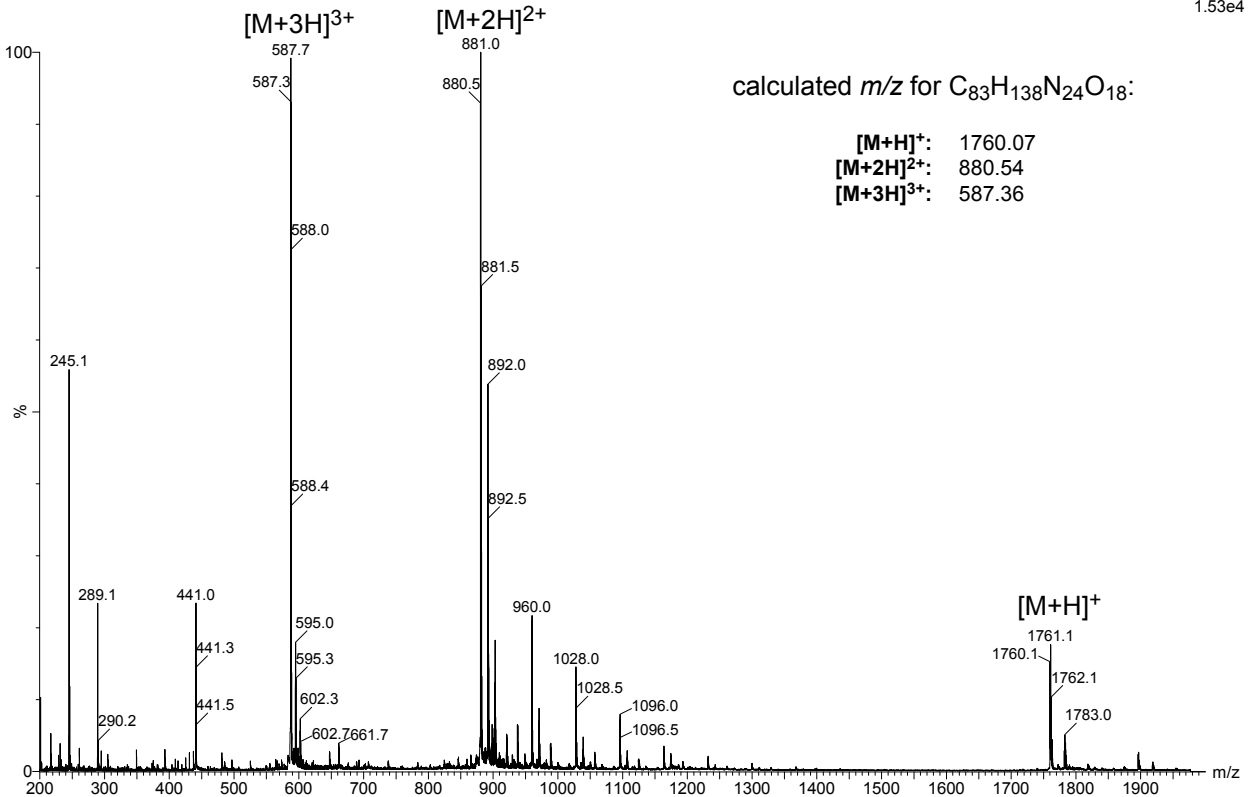

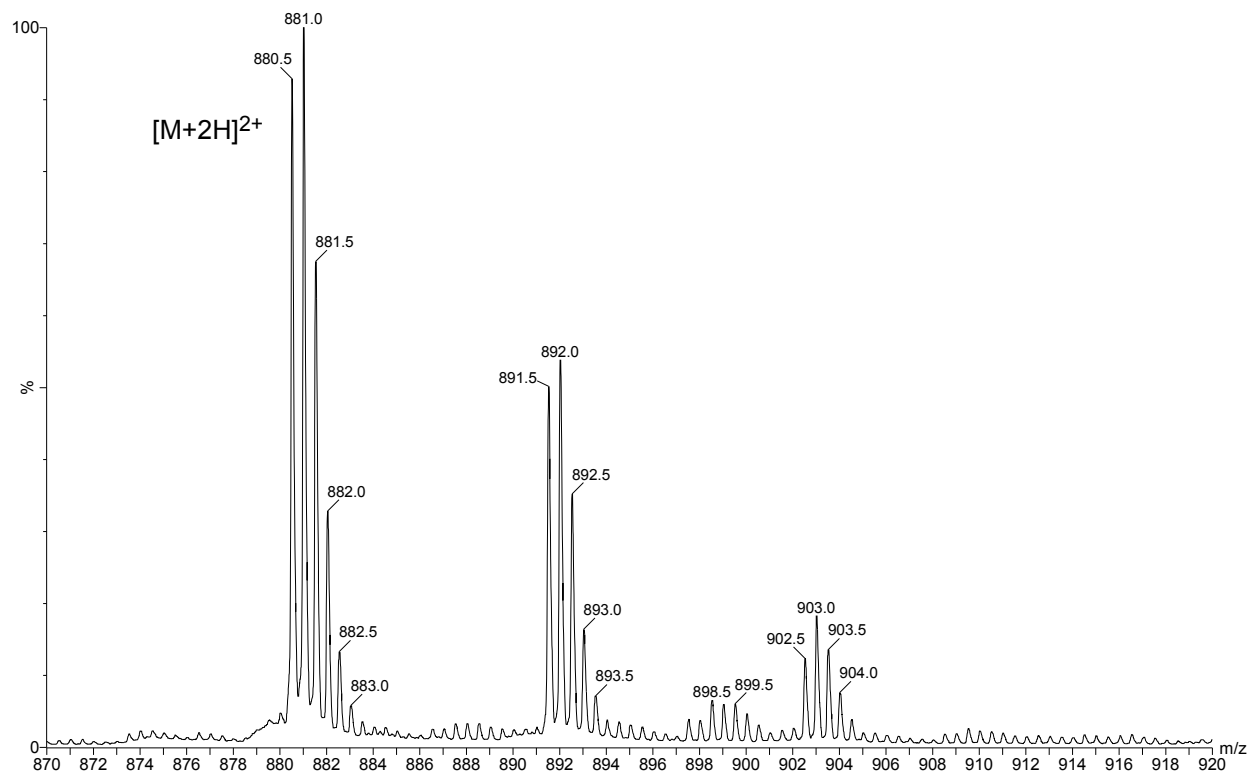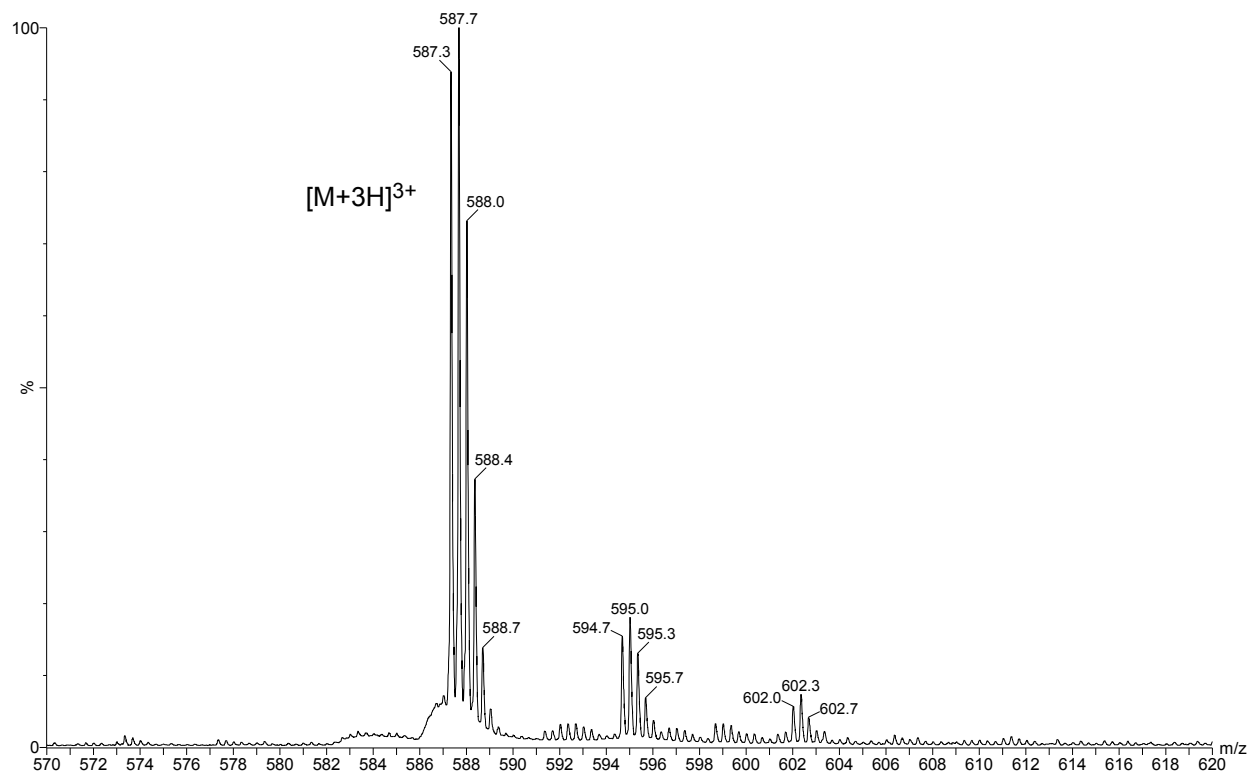



**<sup>1</sup>H NMR of macrocyclic β-sheet peptide 1Arg, 4 mM in 100 mM deuterioacetate buffer in D<sub>2</sub>O at 500 MHz and 298 K**

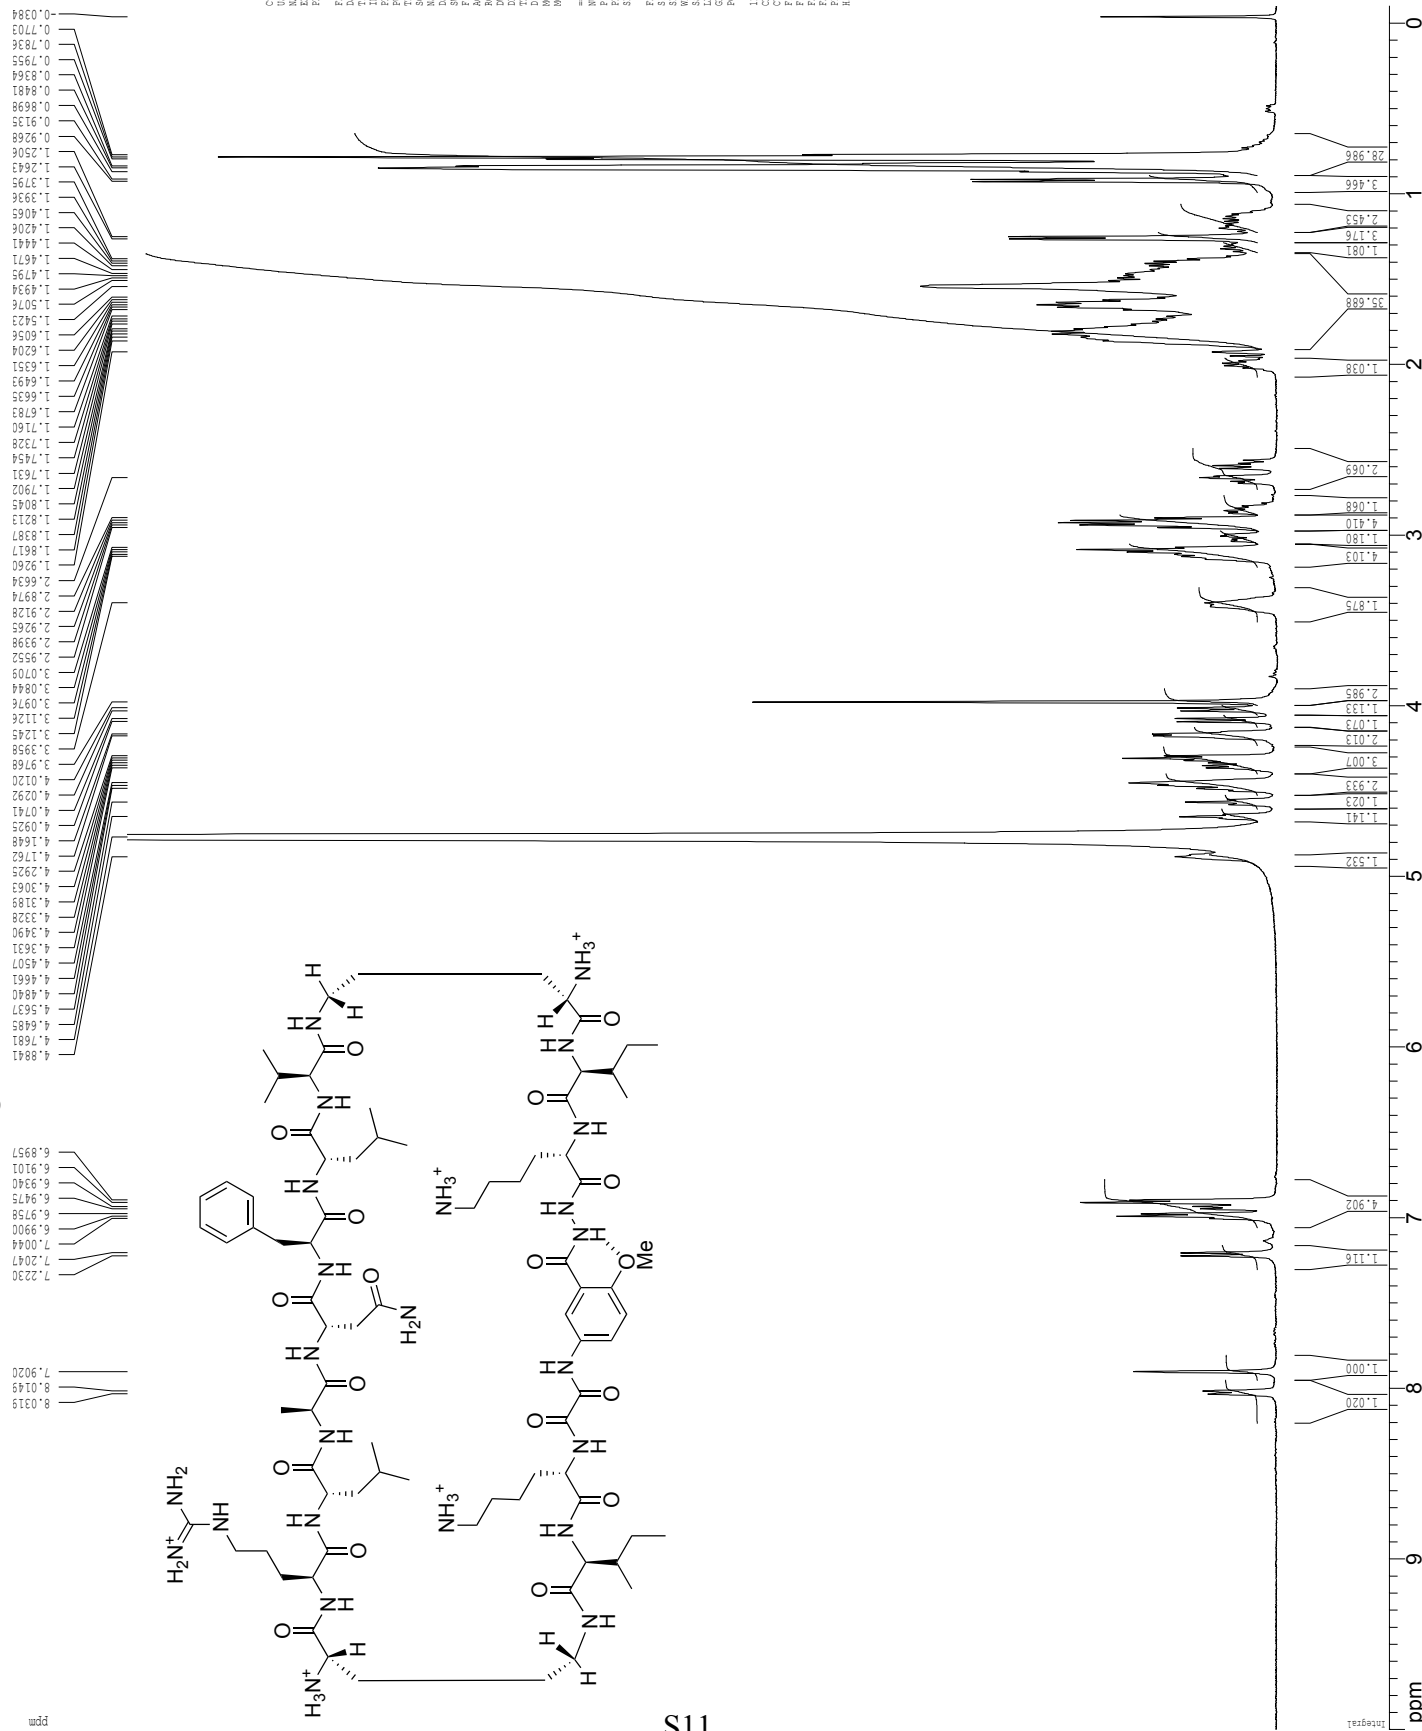

**<sup>1</sup>H NMR of macrocyclic β-sheet peptide 1Arg, 4 mM in 100 mM deuterioacetate buffer in D<sub>2</sub>O at 500 MHz and 298 K**

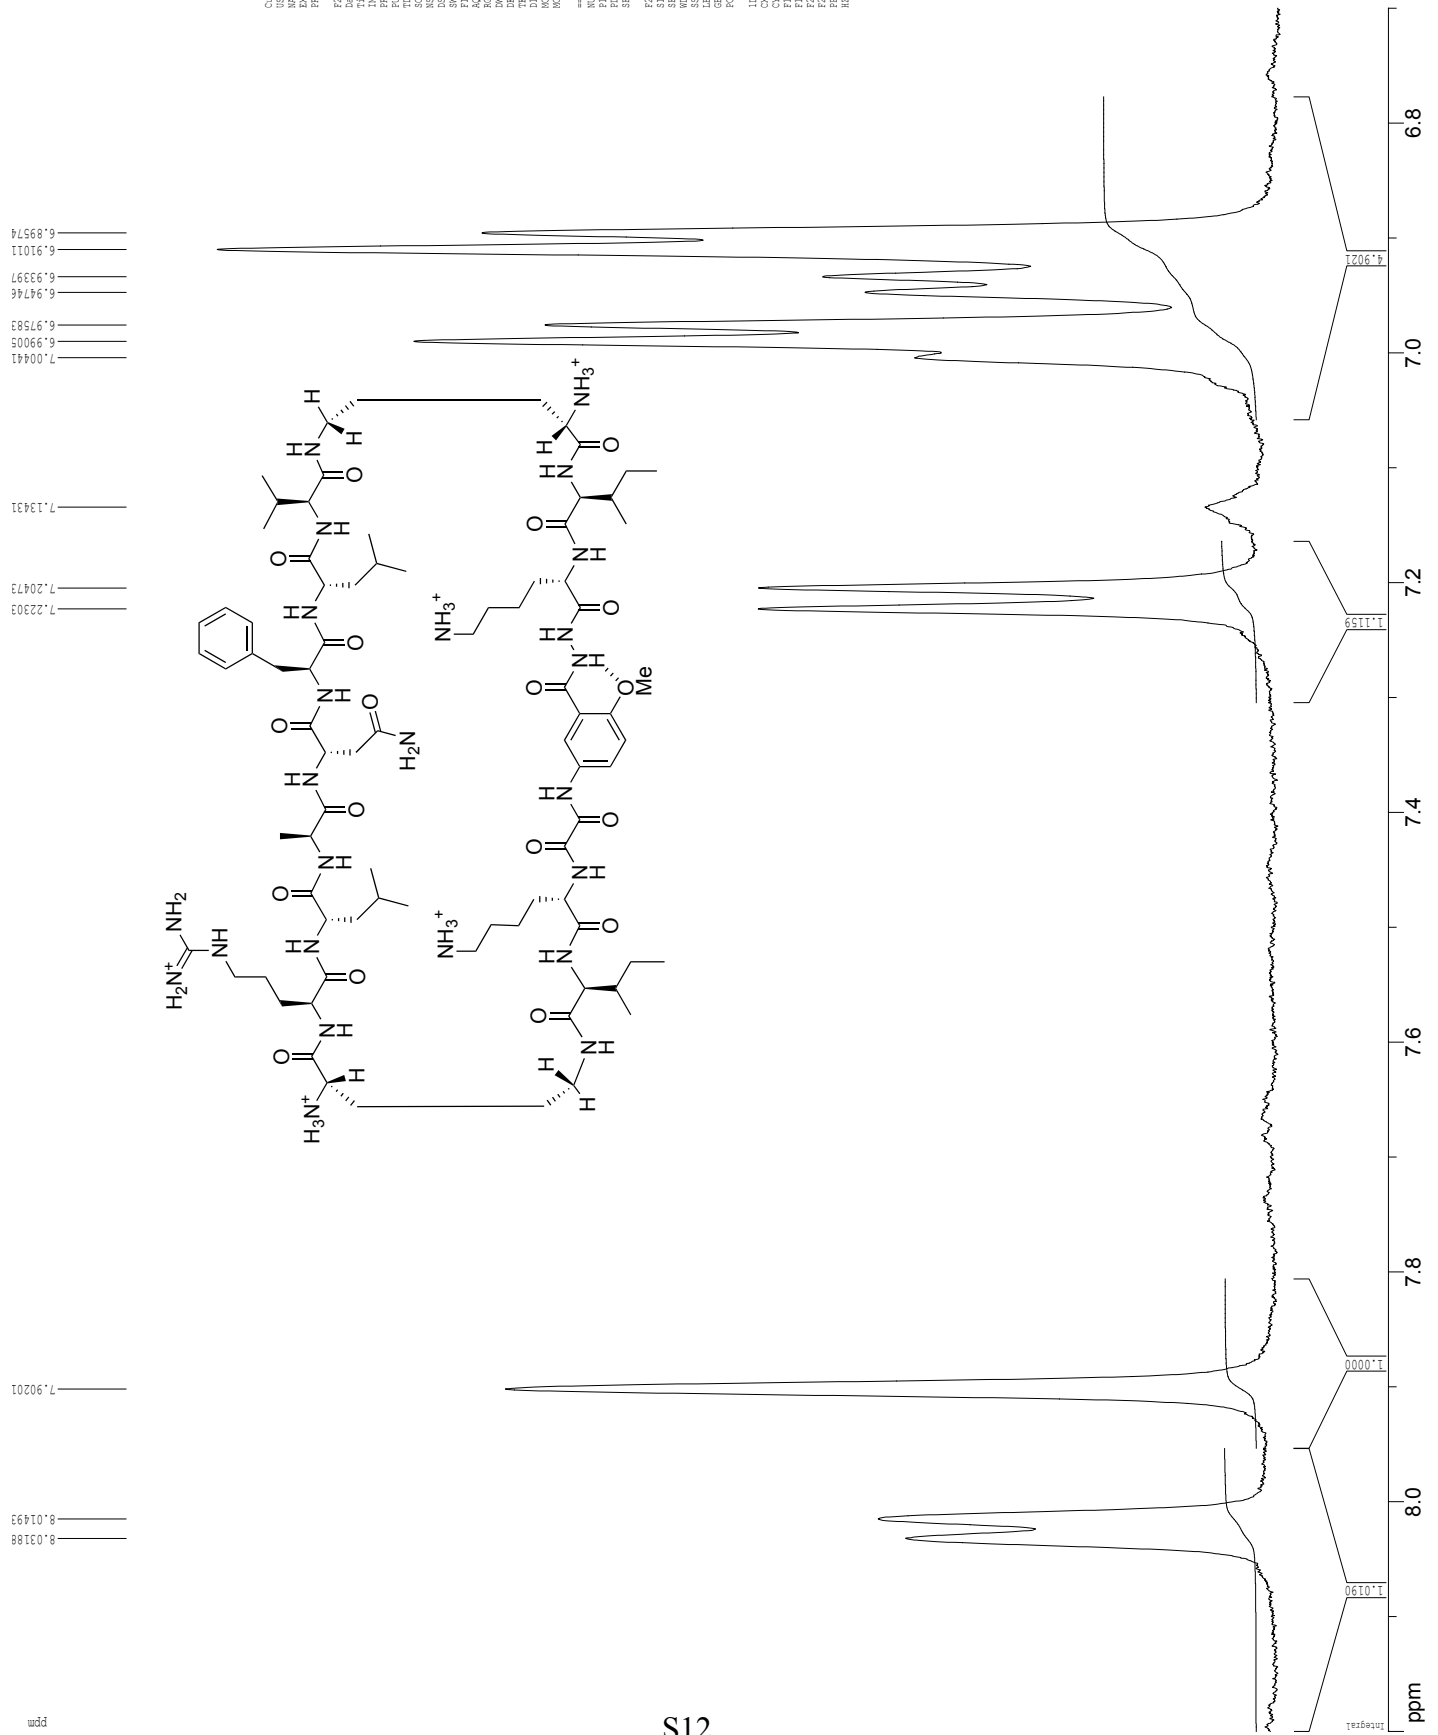

Current Data Parameters  
 USER yllw  
 NAME 2019119\_plantiv-lhaokt-hm  
 PROCNO 1

Acquisition Parameters  
 Date\_ 20191119  
 Time\_ 0.35  
 INSTRON spect  
 PULPROG zgpg30  
 F2 - Processing parameters  
 SI 1  
 SF 500.220000 MHz  
 WF 500.220000 MHz  
 GB 0  
 CB 0.30 Hz  
 PC 4.100

1D NMR plot parameters  
 CV 22.80 cm  
 CT 14.400 cm  
 F1P 61.200 ppm  
 F2P 46.700 ppm  
 F3 3351.47 Hz  
 T1 1.0000000 sec  
 T2 0.1000000 sec  
 T3 0.1000000 sec  
 T4 0.1000000 sec  
 T5 0.1000000 sec  
 T6 0.1000000 sec  
 T7 0.1000000 sec  
 T8 0.1000000 sec  
 T9 0.1000000 sec  
 T10 0.1000000 sec  
 T11 0.1000000 sec  
 T12 0.1000000 sec  
 T13 0.1000000 sec  
 T14 0.1000000 sec  
 T15 0.1000000 sec  
 T16 0.1000000 sec  
 T17 0.1000000 sec  
 T18 0.1000000 sec  
 T19 0.1000000 sec  
 T20 0.1000000 sec  
 T21 0.1000000 sec  
 T22 0.1000000 sec  
 T23 0.1000000 sec  
 T24 0.1000000 sec  
 T25 0.1000000 sec  
 T26 0.1000000 sec  
 T27 0.1000000 sec  
 T28 0.1000000 sec  
 T29 0.1000000 sec  
 T30 0.1000000 sec  
 T31 0.1000000 sec  
 T32 0.1000000 sec  
 T33 0.1000000 sec  
 T34 0.1000000 sec  
 T35 0.1000000 sec  
 T36 0.1000000 sec  
 T37 0.1000000 sec  
 T38 0.1000000 sec  
 T39 0.1000000 sec  
 T40 0.1000000 sec  
 T41 0.1000000 sec  
 T42 0.1000000 sec  
 T43 0.1000000 sec  
 T44 0.1000000 sec  
 T45 0.1000000 sec  
 T46 0.1000000 sec  
 T47 0.1000000 sec  
 T48 0.1000000 sec  
 T49 0.1000000 sec  
 T50 0.1000000 sec  
 T51 0.1000000 sec  
 T52 0.1000000 sec  
 T53 0.1000000 sec  
 T54 0.1000000 sec  
 T55 0.1000000 sec  
 T56 0.1000000 sec  
 T57 0.1000000 sec  
 T58 0.1000000 sec  
 T59 0.1000000 sec  
 T60 0.1000000 sec  
 T61 0.1000000 sec  
 T62 0.1000000 sec  
 T63 0.1000000 sec  
 T64 0.1000000 sec  
 T65 0.1000000 sec  
 T66 0.1000000 sec  
 T67 0.1000000 sec  
 T68 0.1000000 sec  
 T69 0.1000000 sec  
 T70 0.1000000 sec  
 T71 0.1000000 sec  
 T72 0.1000000 sec  
 T73 0.1000000 sec  
 T74 0.1000000 sec  
 T75 0.1000000 sec  
 T76 0.1000000 sec  
 T77 0.1000000 sec  
 T78 0.1000000 sec  
 T79 0.1000000 sec  
 T80 0.1000000 sec  
 T81 0.1000000 sec  
 T82 0.1000000 sec  
 T83 0.1000000 sec  
 T84 0.1000000 sec  
 T85 0.1000000 sec  
 T86 0.1000000 sec  
 T87 0.1000000 sec  
 T88 0.1000000 sec  
 T89 0.1000000 sec  
 T90 0.1000000 sec  
 T91 0.1000000 sec  
 T92 0.1000000 sec  
 T93 0.1000000 sec  
 T94 0.1000000 sec  
 T95 0.1000000 sec  
 T96 0.1000000 sec  
 T97 0.1000000 sec  
 T98 0.1000000 sec  
 T99 0.1000000 sec  
 T100 0.1000000 sec

**<sup>1</sup>H NMR of macrocyclic β-sheet peptide 1Arg, 4 mM in 100 mM deuterioacetate buffer in D<sub>2</sub>O at 500 MHz and 298 K**

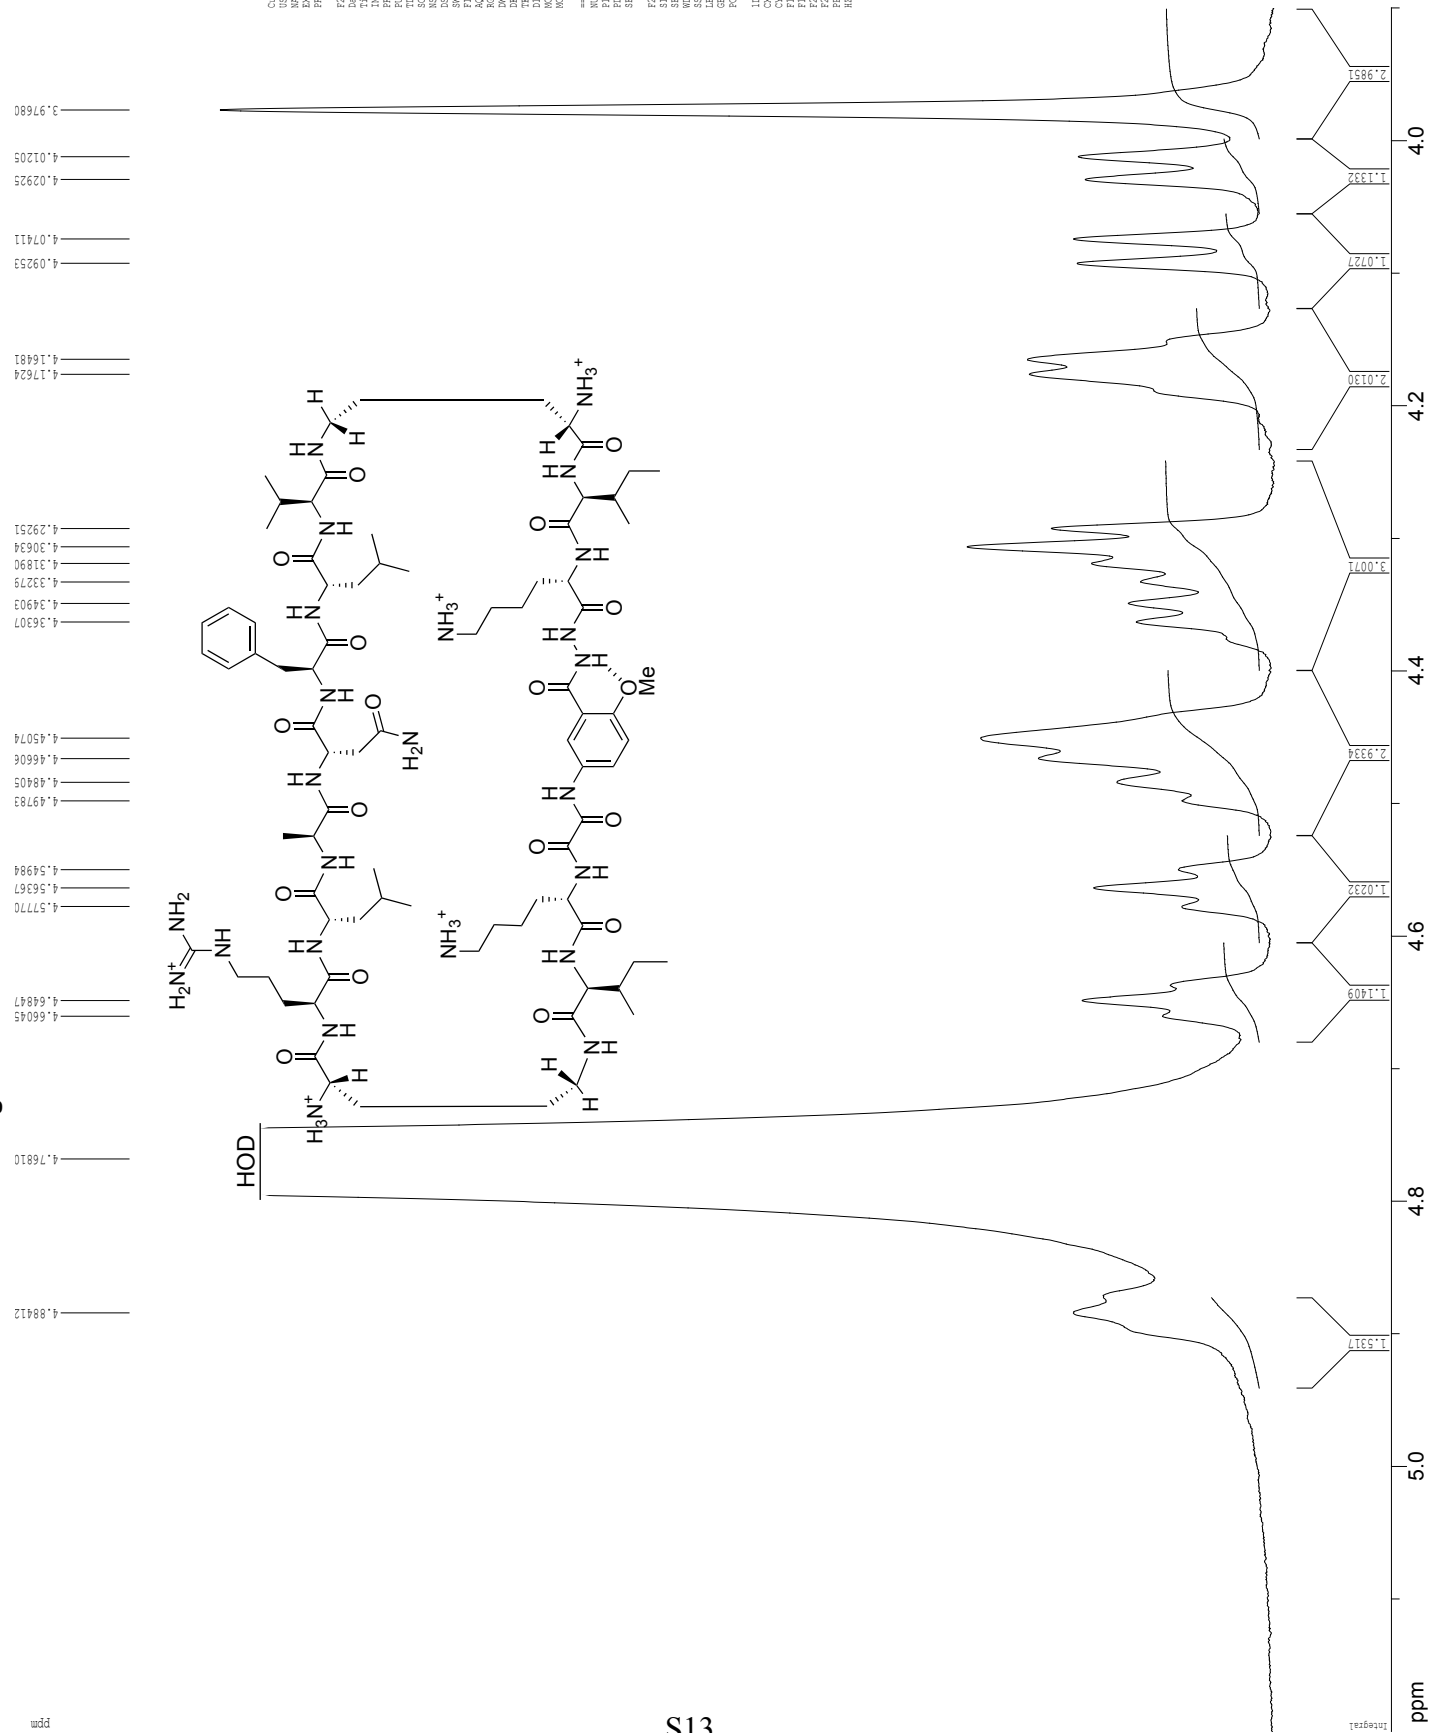



**<sup>1</sup>H NMR of macrocyclic β-sheet peptide 1Arg, 4 mM in 100 mM deuterioacetate buffer in D<sub>2</sub>O at 500 MHz and 298 K**

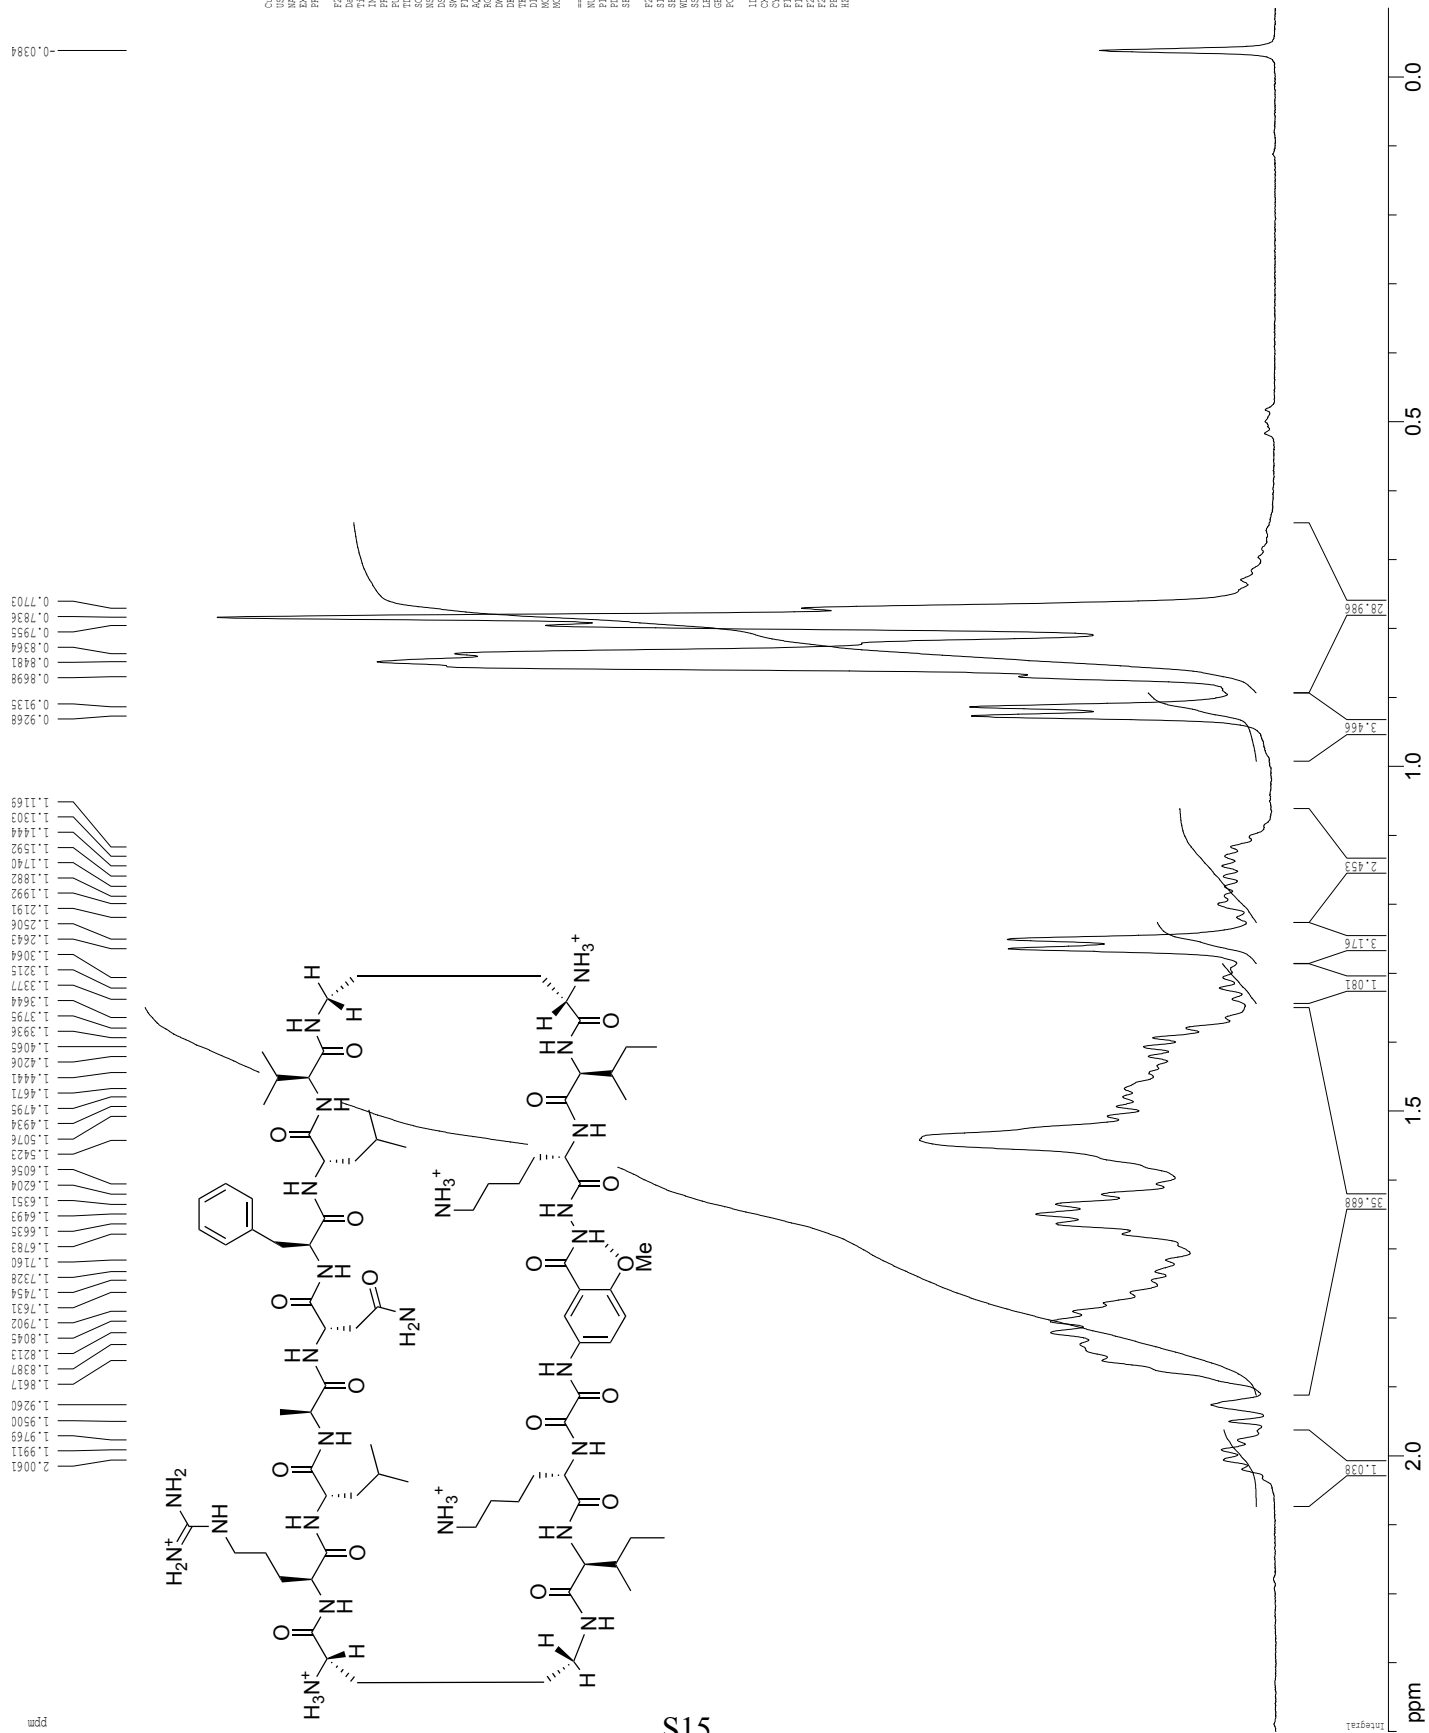

Current Data Parameters  
 USER yllw  
 NAME 2019119\_plantiv-lhaokt-hm  
 PROCNO 1

Data Acquisition Parameters  
 Date\_ 201911  
 Time 0.35  
 INSTRON ccp010  
 PULPROG zgpg30  
 F2 - Processing parameters  
 SI 500.220725 MHz  
 SF01 500.220725 MHz  
 F2 - Processing parameters  
 SI 500.220725 MHz  
 SF01 500.220725 MHz  
 WDW EM  
 SSB 0  
 GB 0  
 PC 4.100

1D NMR plot parameters  
 CX 22.80 cm  
 CY 14.00 cm  
 F1P 2.000 ppm  
 F2P -0.110 ppm  
 F3P -30.02 Hz  
 HZPC 54.94865 ppm/cm  
 HZCX 54.94865 ppm/cm

$^1\text{H}$  NMR 2D TOCSY of macrocyclic  $\beta$ -sheet peptide **1Arg** with 150-ms spin-lock mixing time  
4 mM in 100 mM deuterioacetate buffer in  $\text{D}_2\text{O}$  at 500 MHz and 298 K

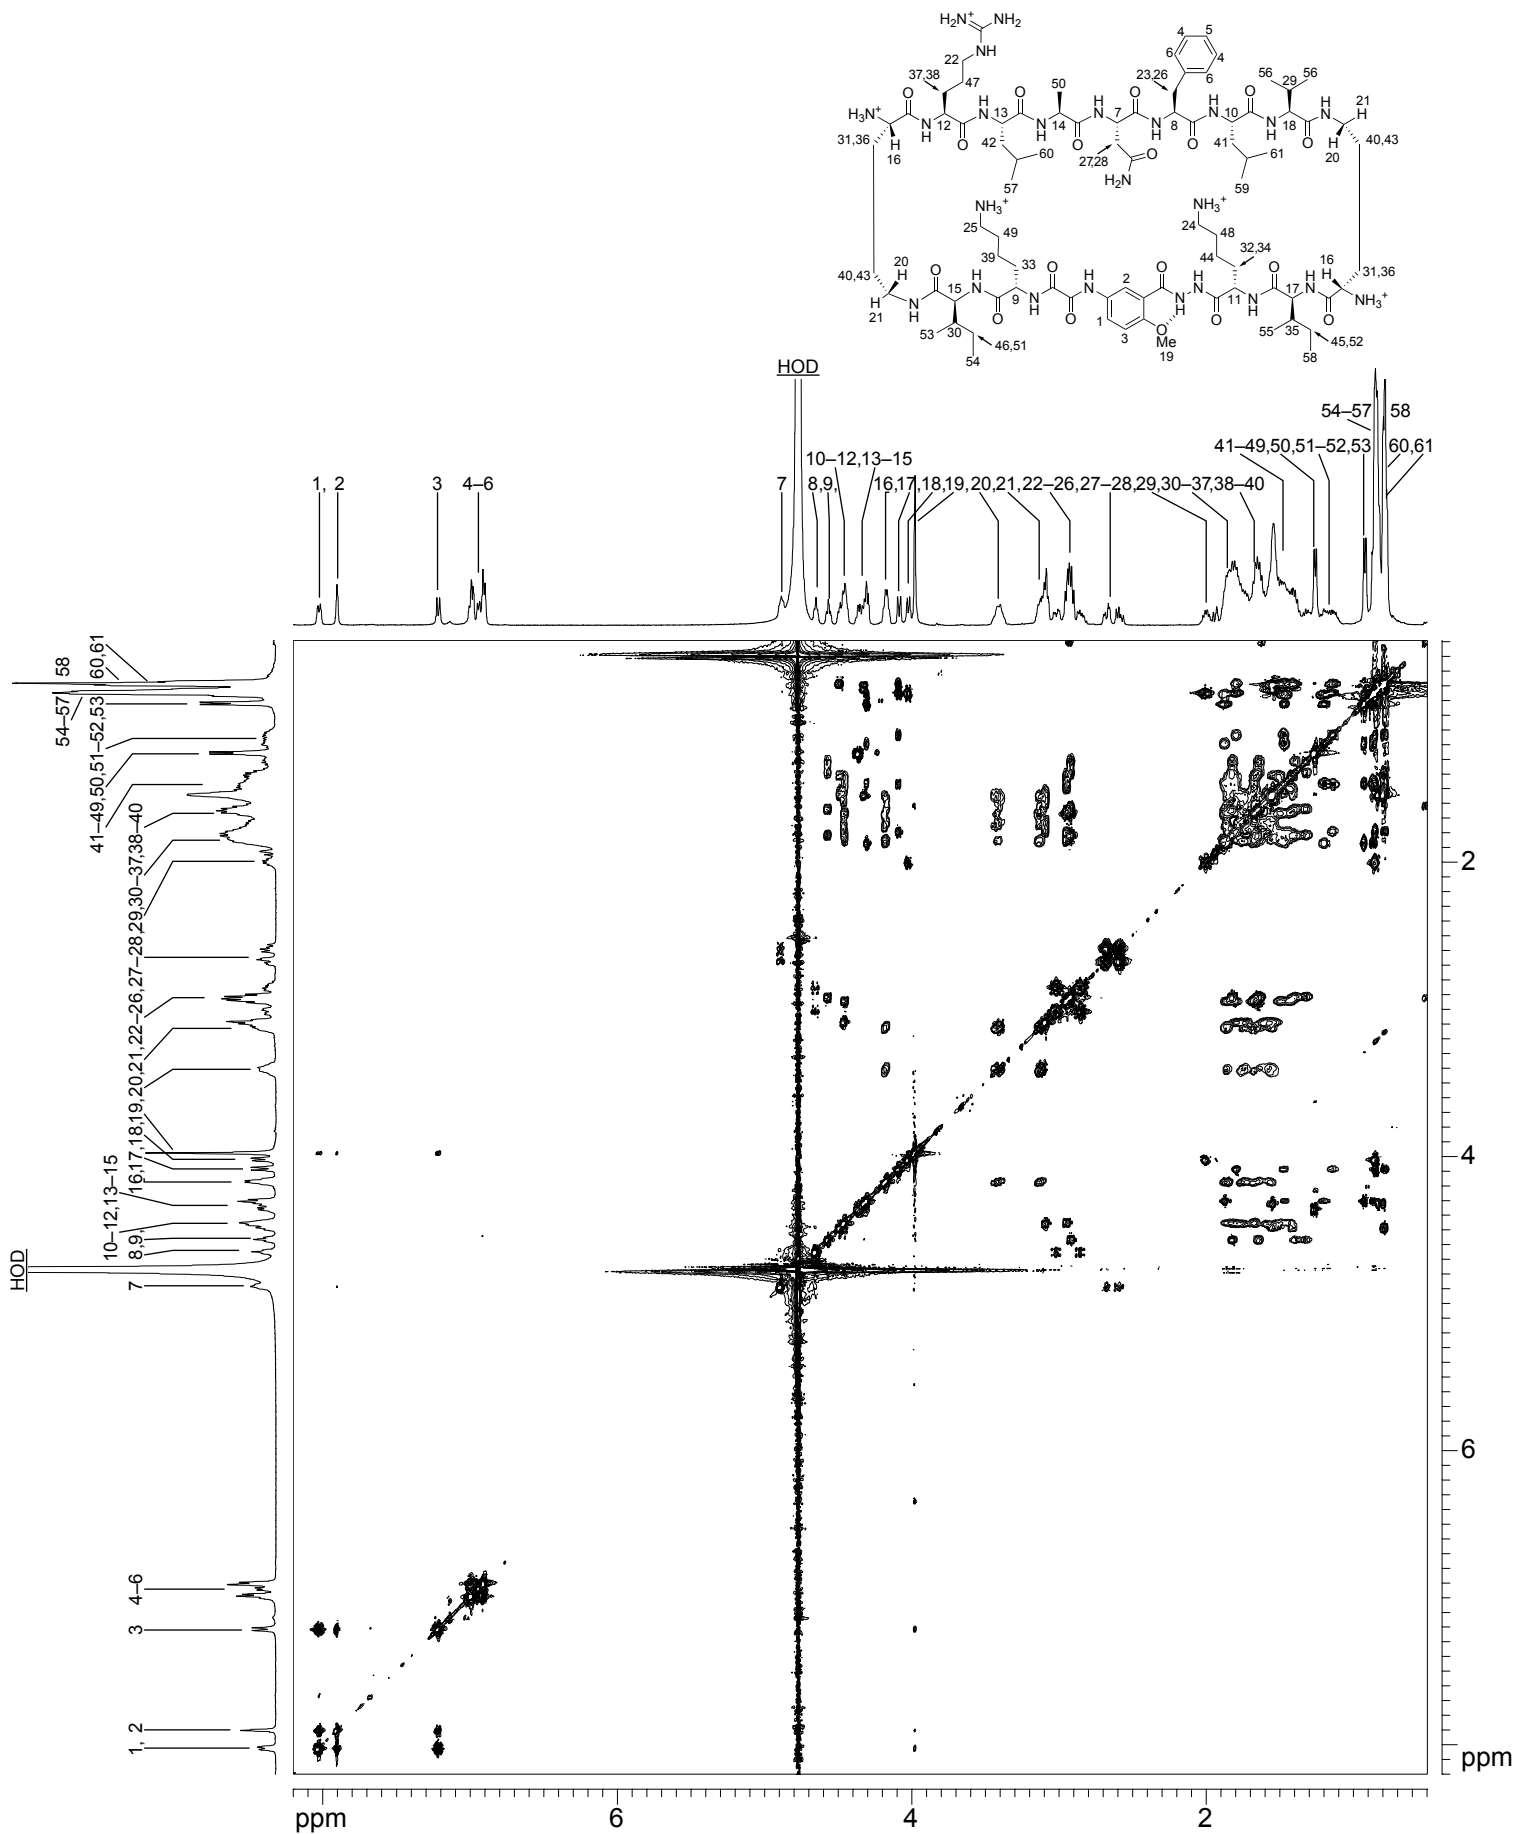

$^1\text{H}$  NMR 2D TOCSY of macrocyclic  $\beta$ -sheet peptide **1Arg** with 150-ms spin-lock mixing time  
4 mM in 100 mM deuterioacetate buffer in  $\text{D}_2\text{O}$  at 500 MHz and 298 K

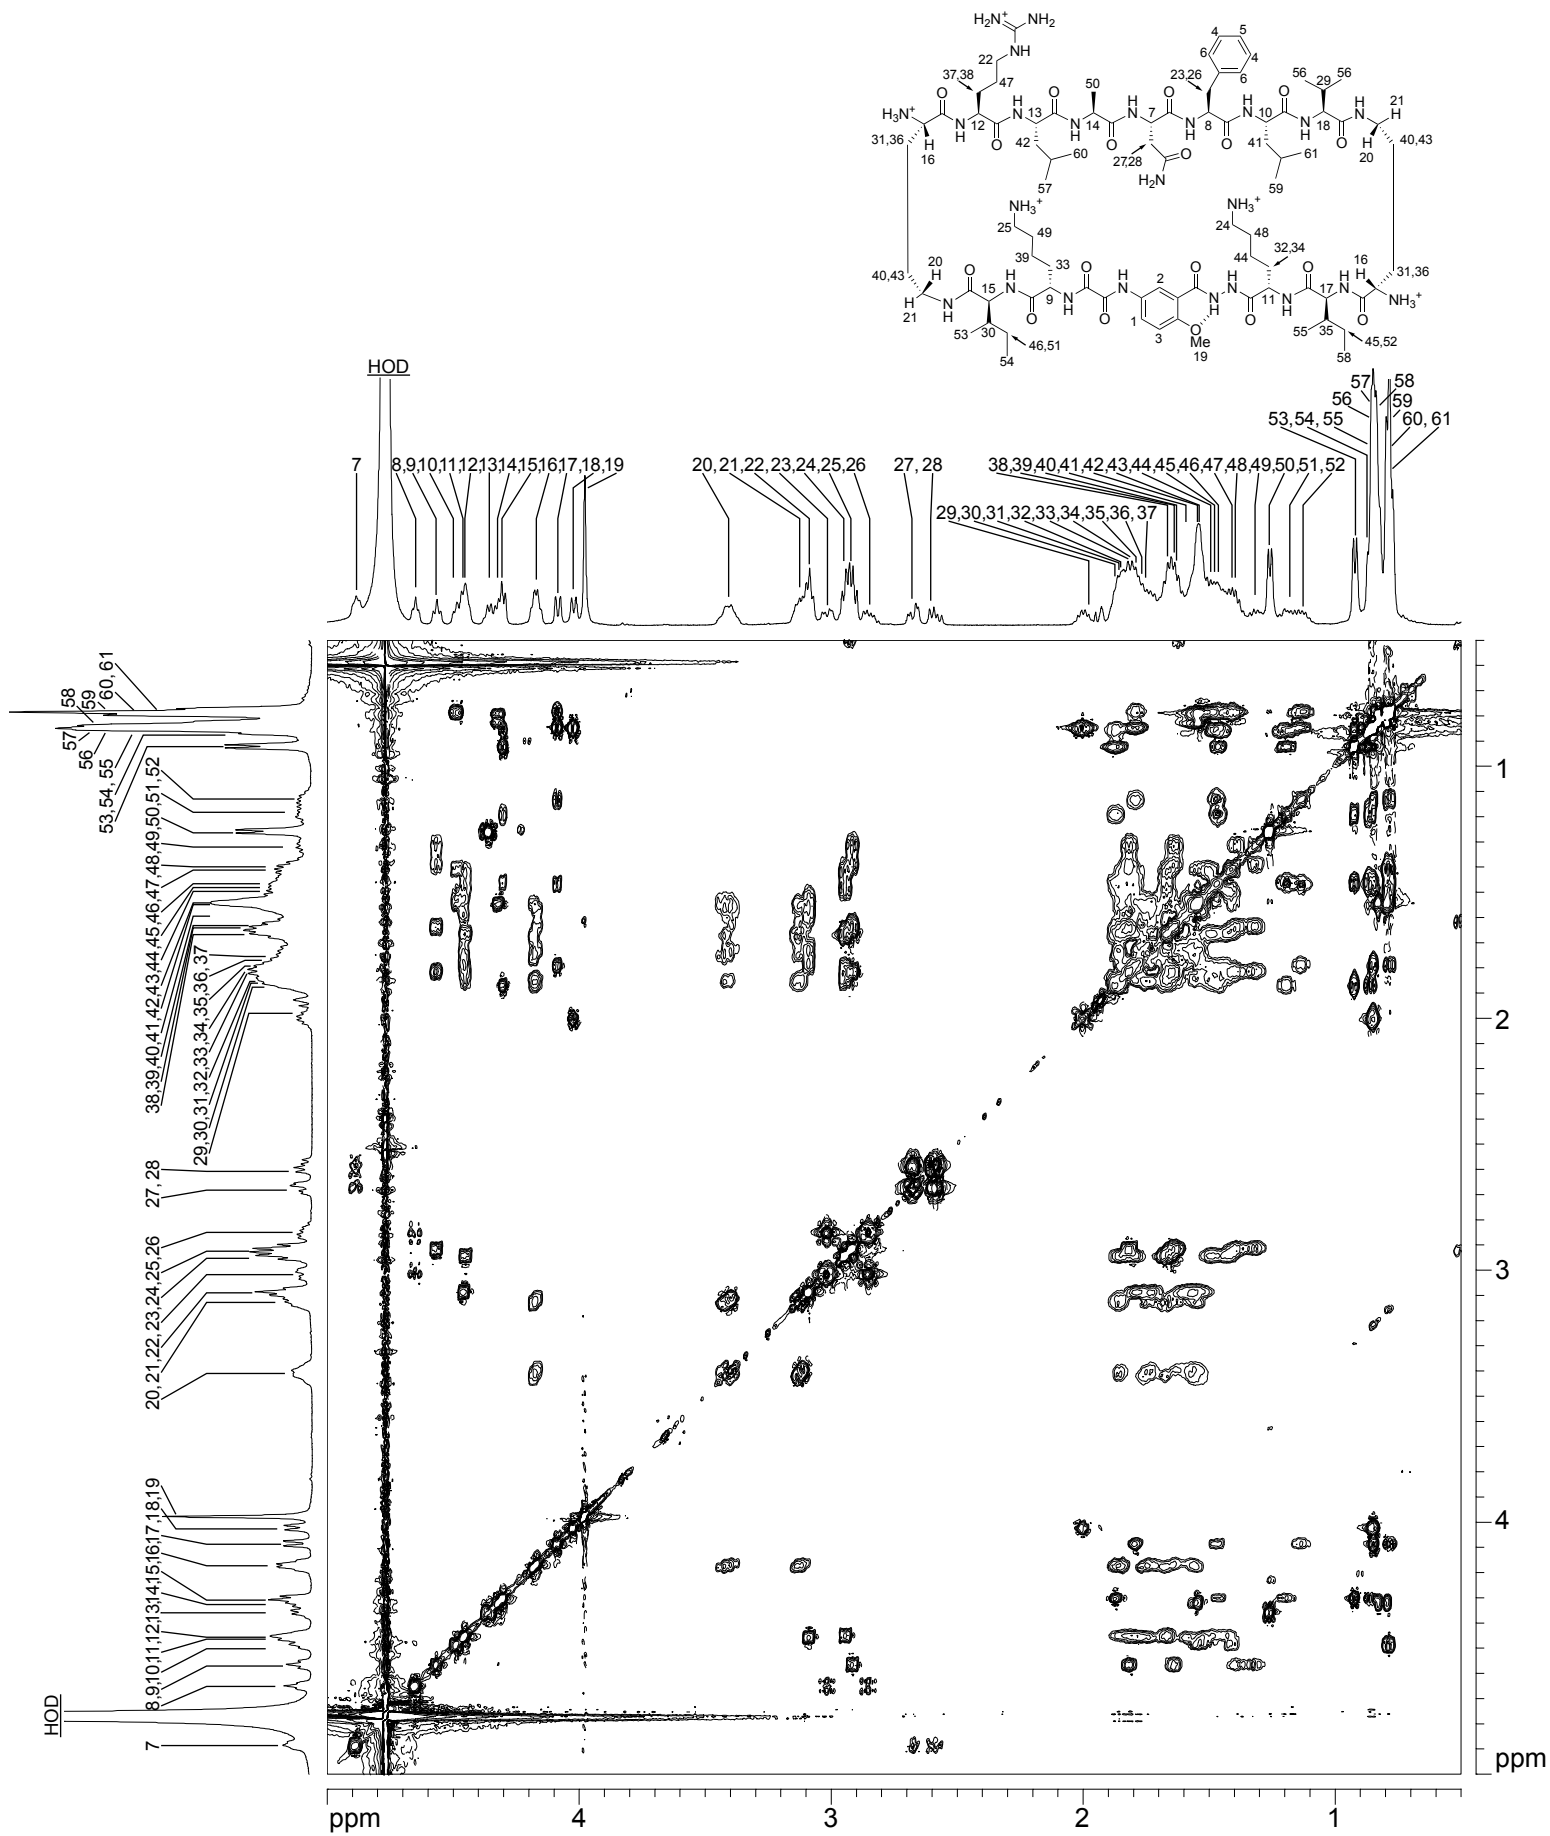

$^1\text{H}$  NMR 2D ROESY of macrocyclic  $\beta$ -sheet peptide **1Arg** with 150-ms spin-lock mixing time  
4 mM in 100 mM deuterioacetate buffer in  $\text{D}_2\text{O}$  at 500 MHz and 298 K

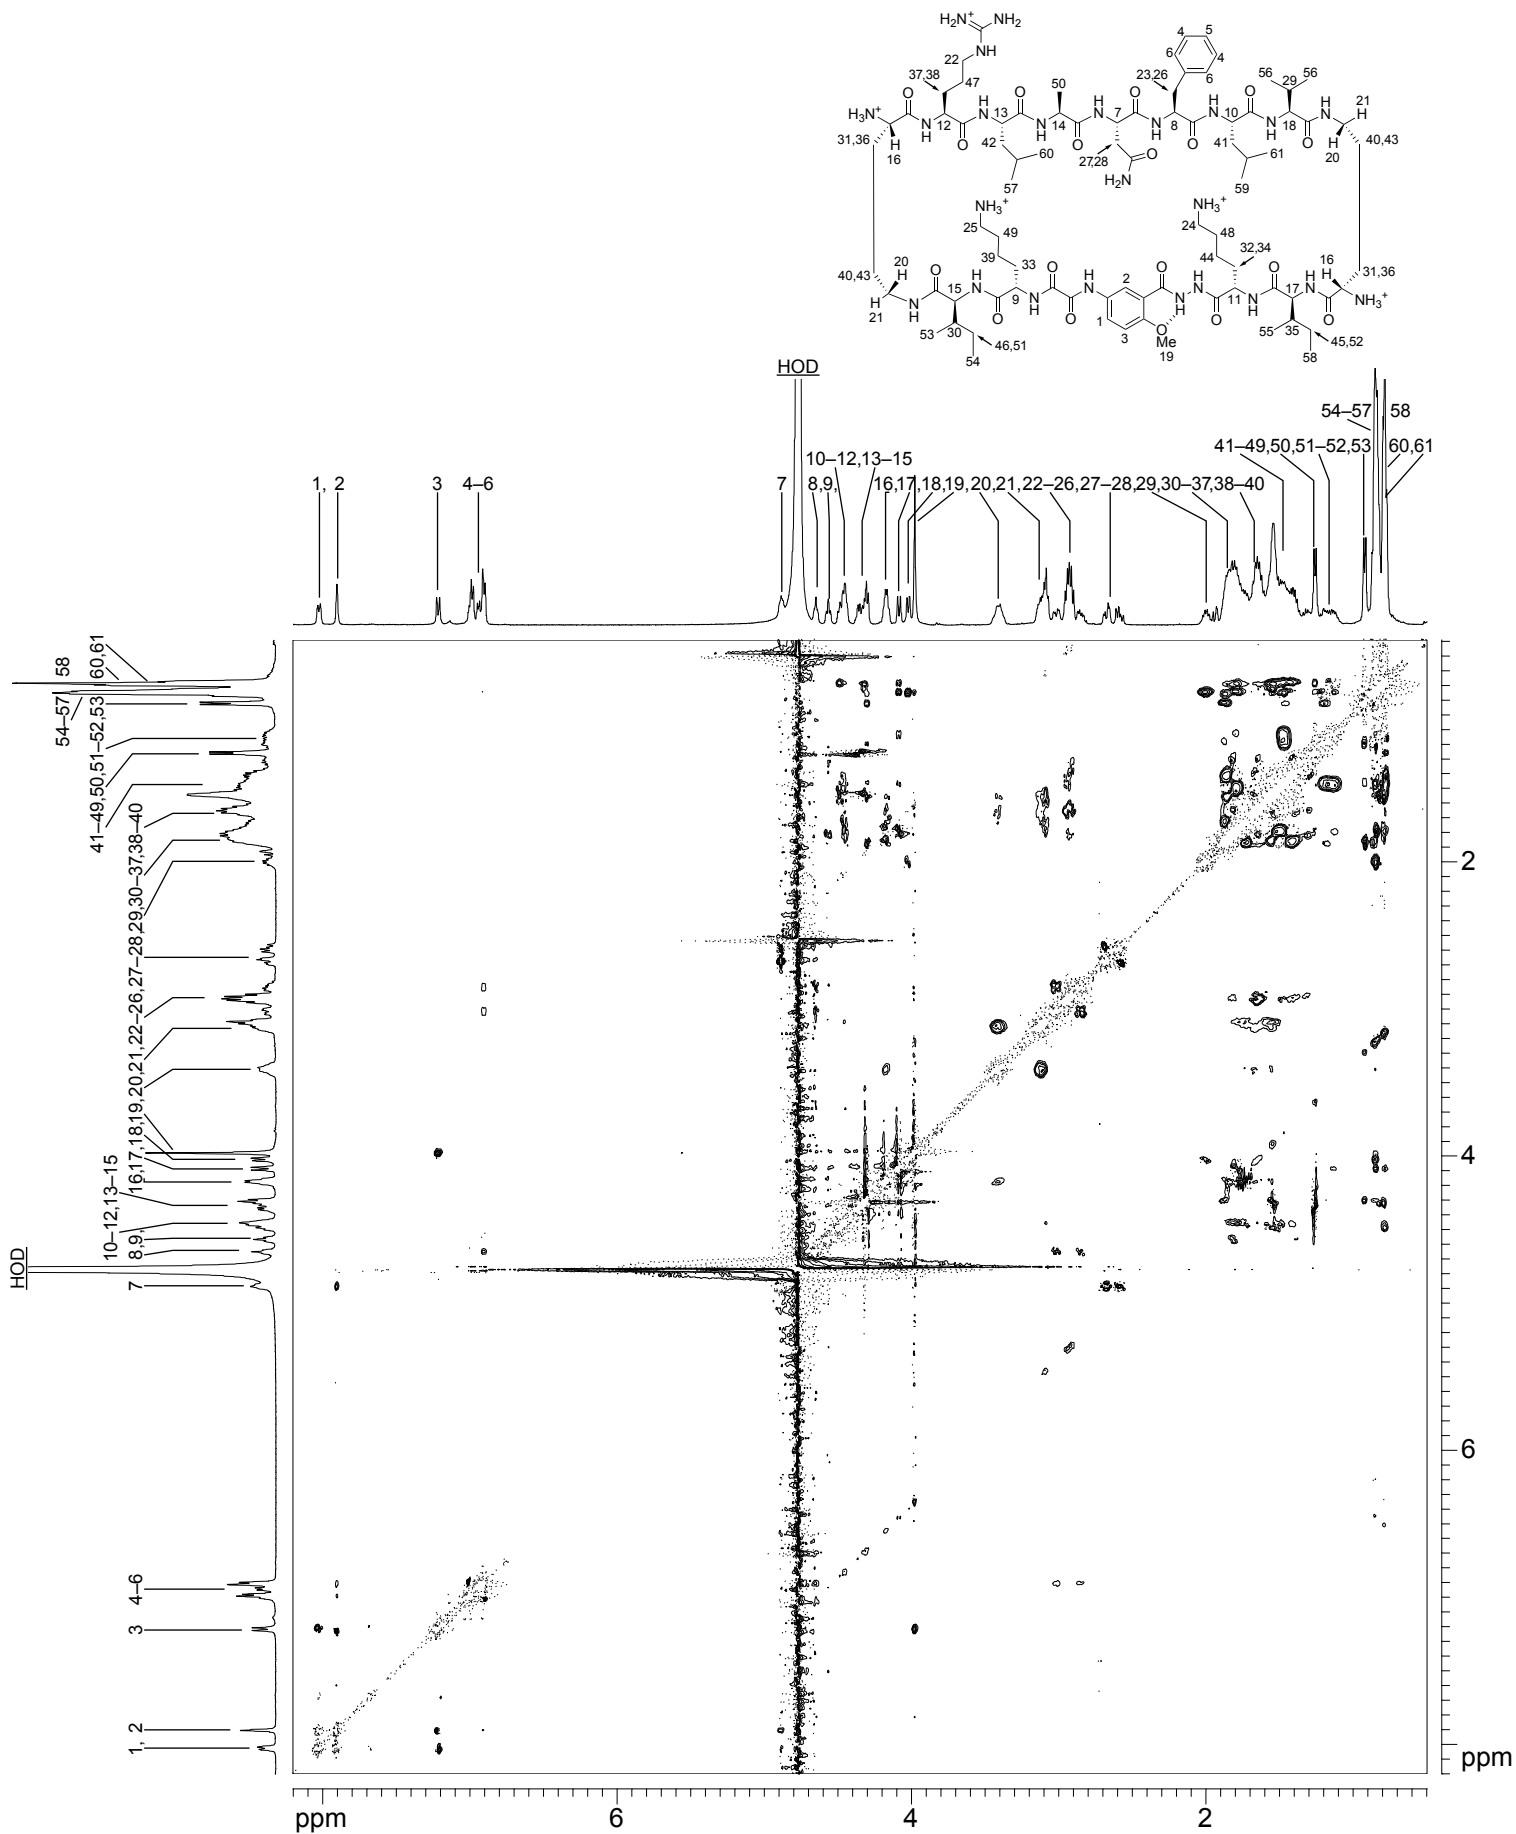



$^1\text{H}$  NMR 2D ROESY of macrocyclic  $\beta$ -sheet peptide **1Arg** with 150-ms spin-lock mixing time  
4 mM in 100 mM deuterioacetate buffer in  $\text{D}_2\text{O}$  at 500 MHz and 298 K

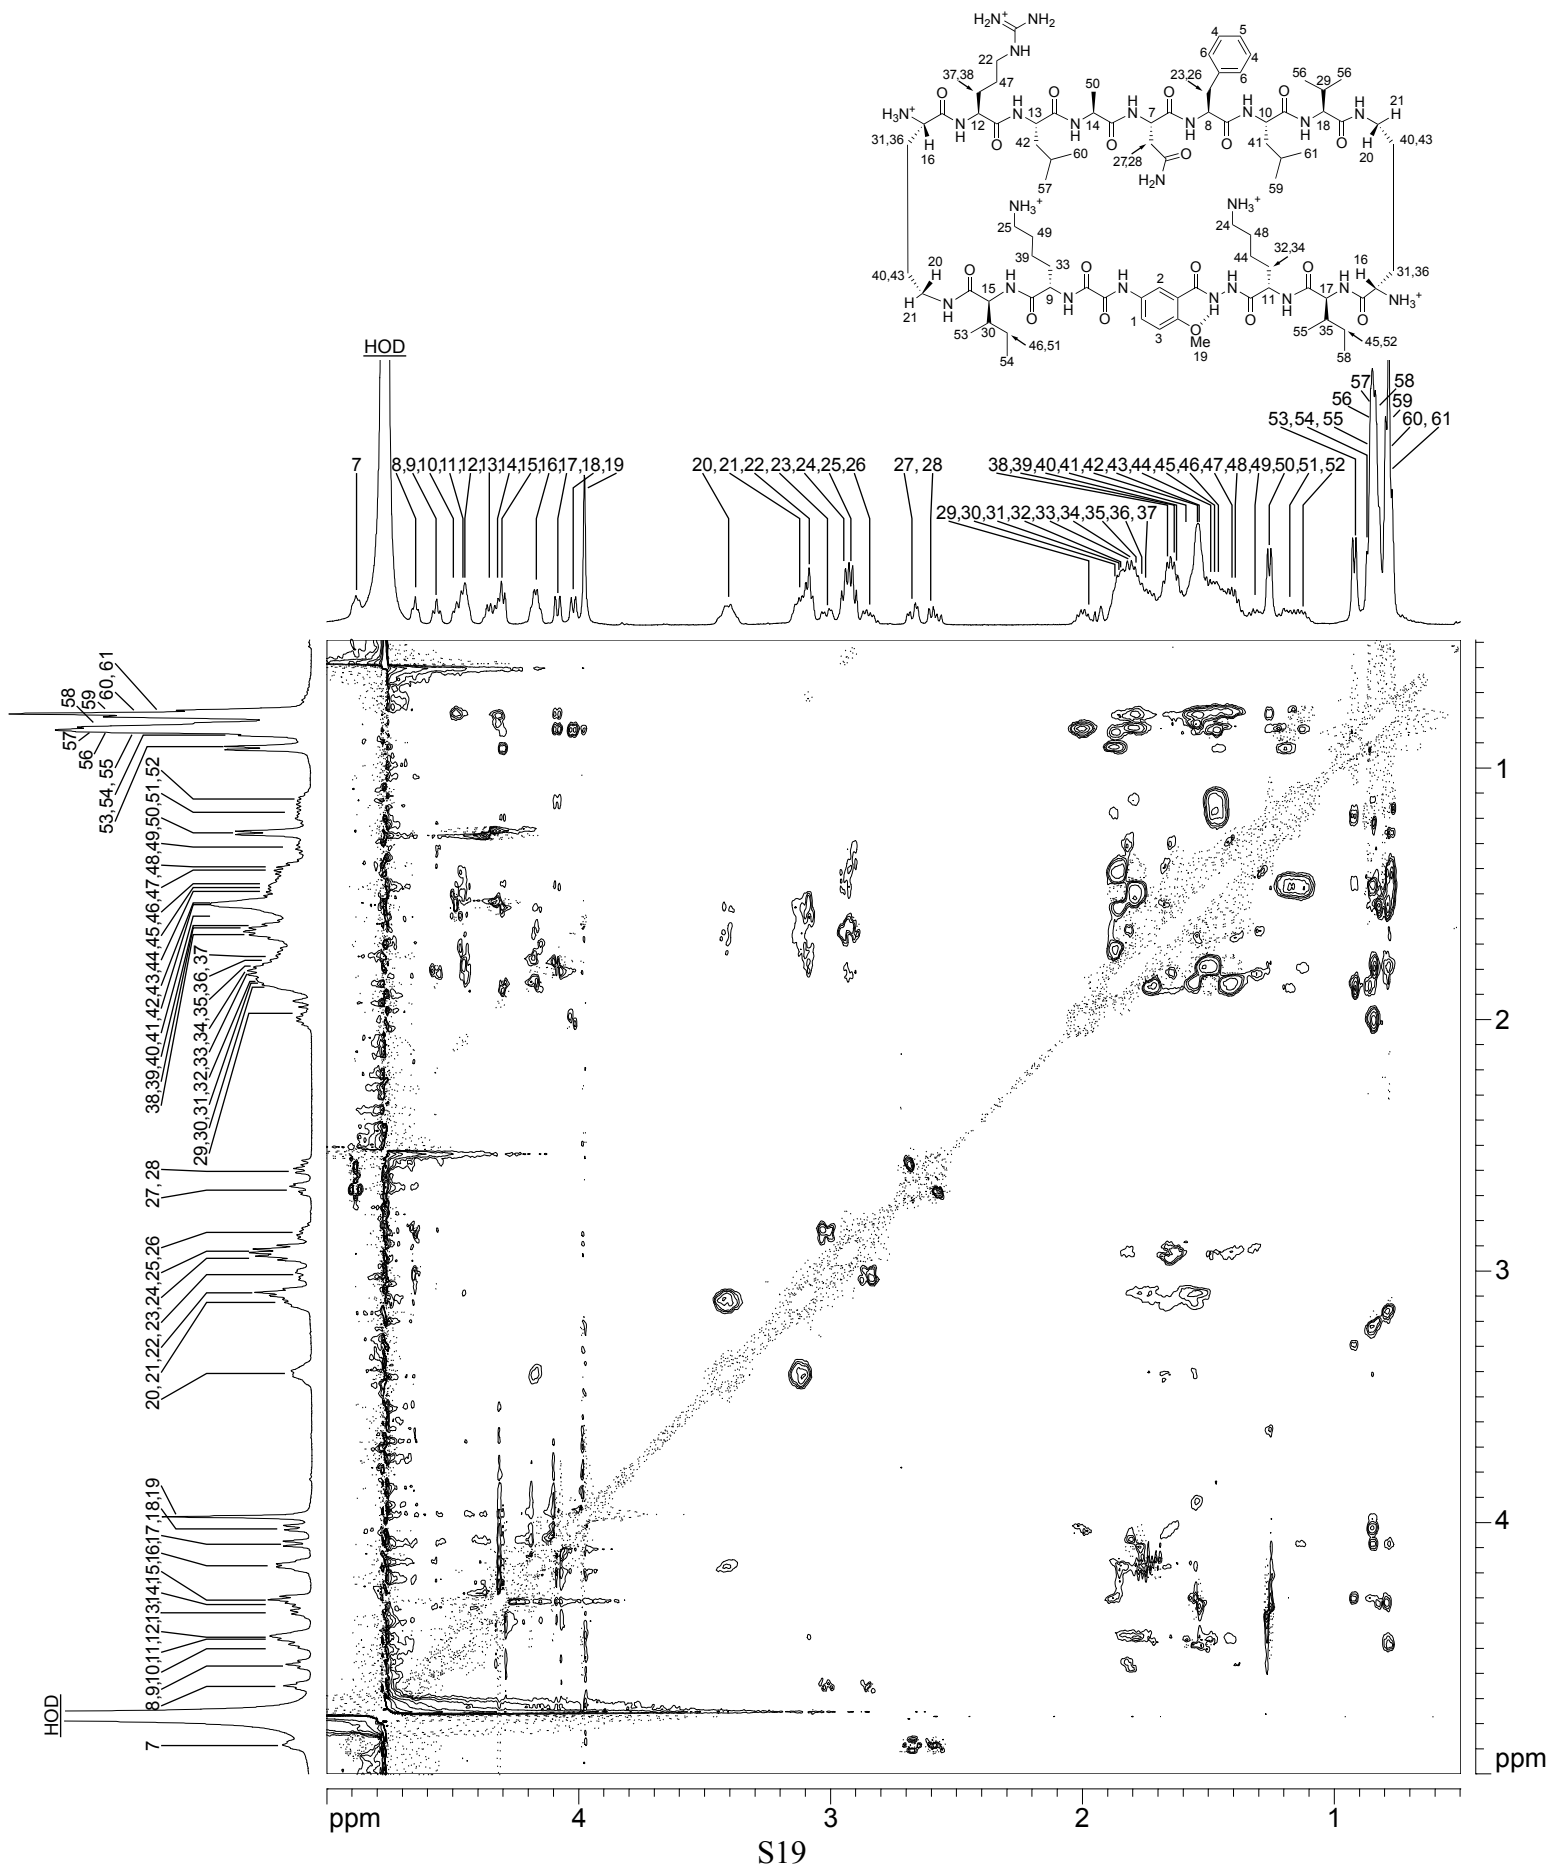

$^1\text{H}$  NMR DOSY of macrocyclic  $\beta$ -sheet peptide **1Arg** at 500 MHz and 298 K  
4 mM in 100 mM deuterioacetate buffer in  $\text{D}_2\text{O}$

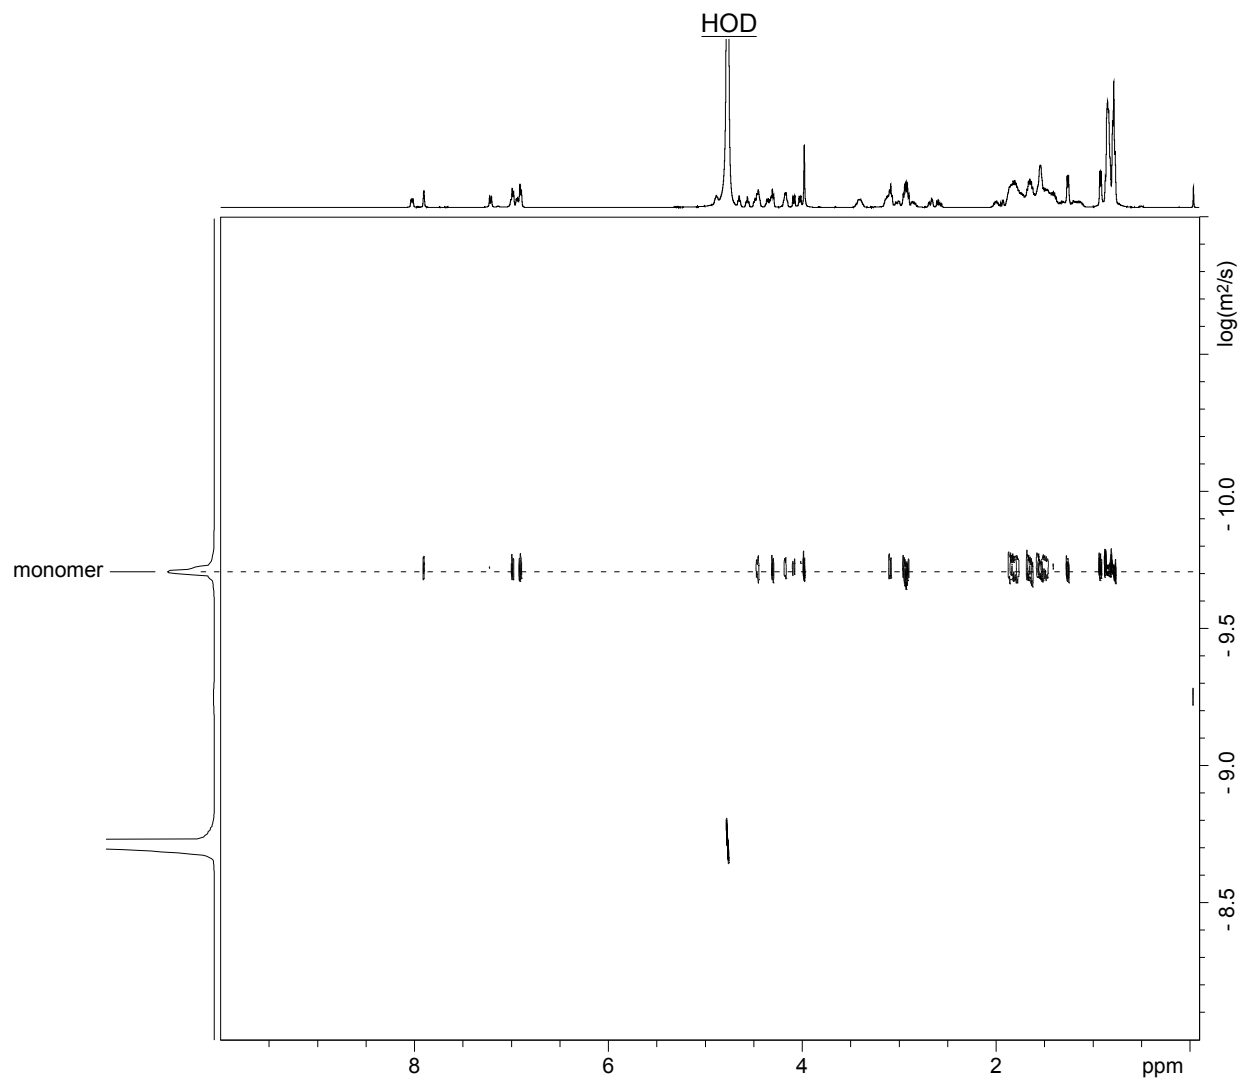

Calculations for macrocyclic  $\beta$ -sheet peptide **1Arg** at 4 mM

$$D_{\text{HOD}} = 19.0 \times 10^{-10} \text{ m}^2/\text{s} \text{ }^a$$

$$\log(D_{\text{HOD}}) = -8.721$$

$$D_{\text{monomer}} : \log(D) = -9.708; D = 10^{-9.708} = 19.6 \pm 0.6 \times 10^{-11} \text{ m}^2/\text{s}$$

<sup>a</sup>Longworth, L. G. *J. Phys. Chem.* **1960**, *64*, 1914–1917.

RP-HPLC of Macrocytic  $\beta$ -Sheet 1<sub>cit</sub>

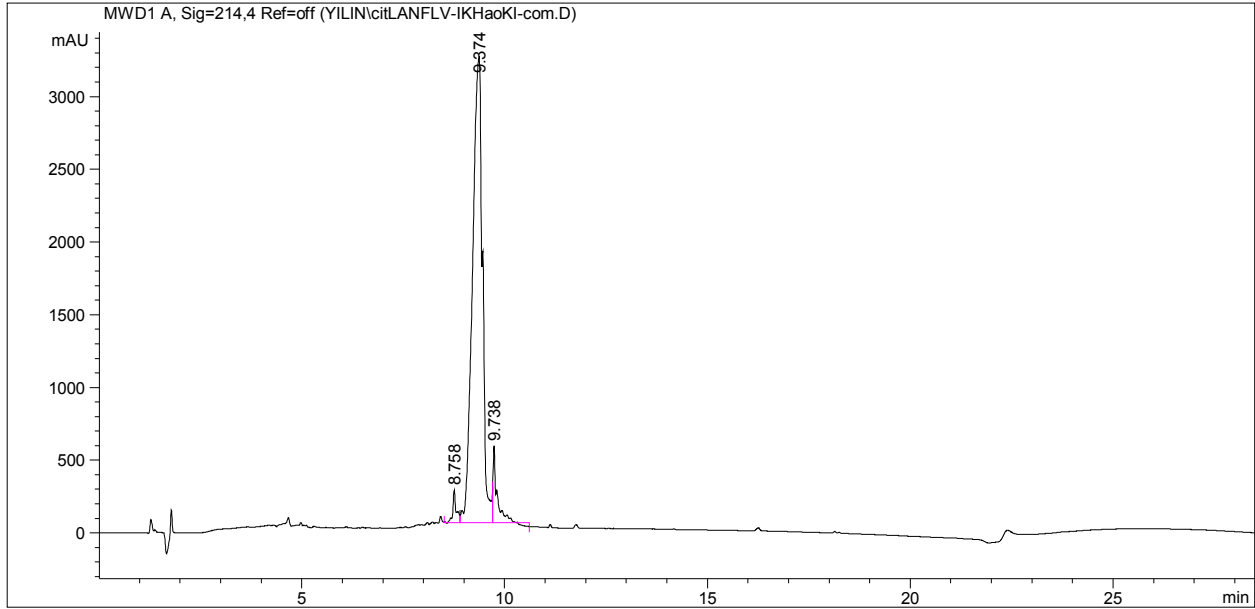

| Peak # | RetTime [min] | Type | Width [min] | Area mAU*s | Height [mAU] | Area %  |
|--------|---------------|------|-------------|------------|--------------|---------|
| 1      | 8.758         | MF   | 0.0983      | 1323.3335  | 224.3247     | 2.2091  |
| 2      | 9.374         | FM   | 0.2858      | 5.4981e4   | 3206.0356    | 91.7819 |
| 3      | 9.738         | FM   | 0.1130      | 3599.7199  | 530.8340     | 6.0090  |

**column:** Aeris XB-C18 2.6 $\mu$   
**dimensions:** 150 mm x 4.6 mm  
**mobile phase:** A: H<sub>2</sub>O, 0.1% TFA  
 B: CH<sub>3</sub>CN, 0.1% TFA  
**gradient:** A/B (95:5) to (0:100) in 20 min  
**flow rate:** 1.0 mL/min  
**detection:** VWD, wavelength = 214 nm  
**temperature:** 298 K

MS (ESI) of Macrocytic  $\beta$ -Sheet 1<sub>cit</sub>

yilinw7-citLANFLV-IKhaokI-1 35 (0.642) Sm (Md, 3.00); Cm (4:55)

TOF MS ES+  
2.41e4

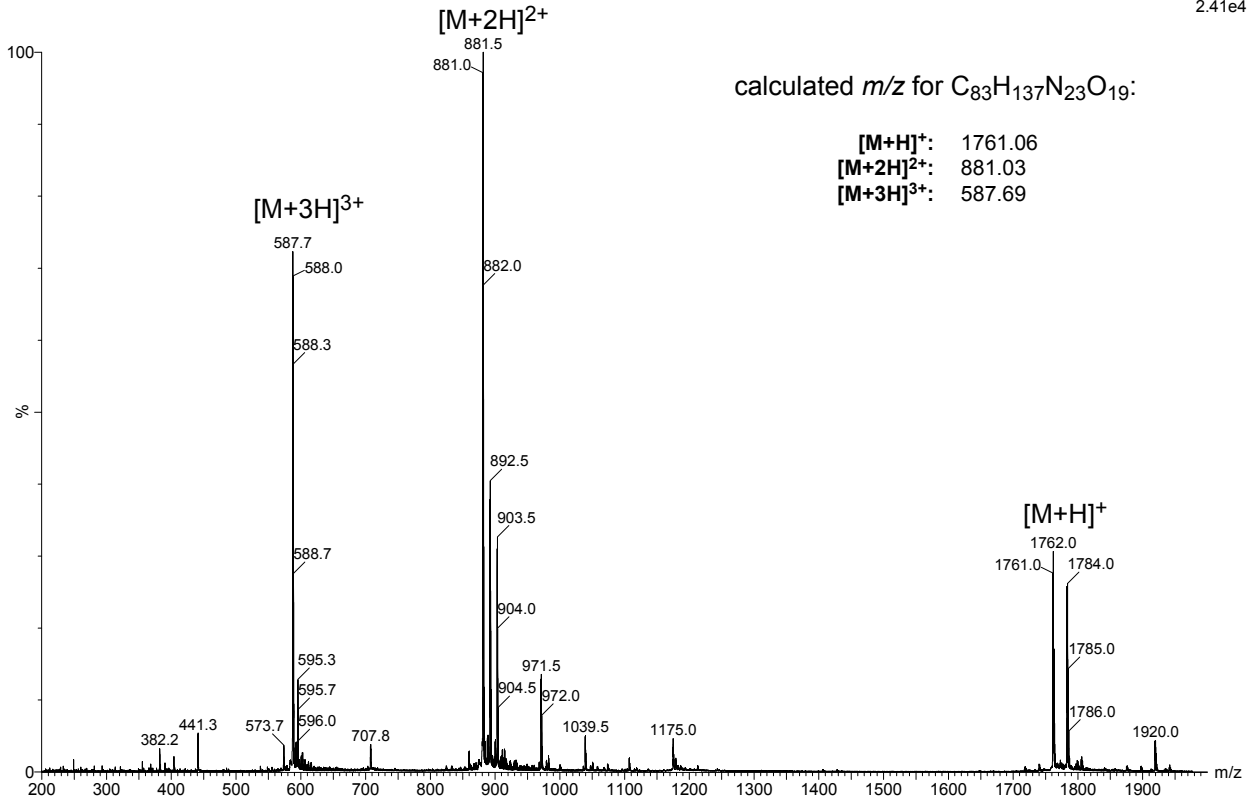

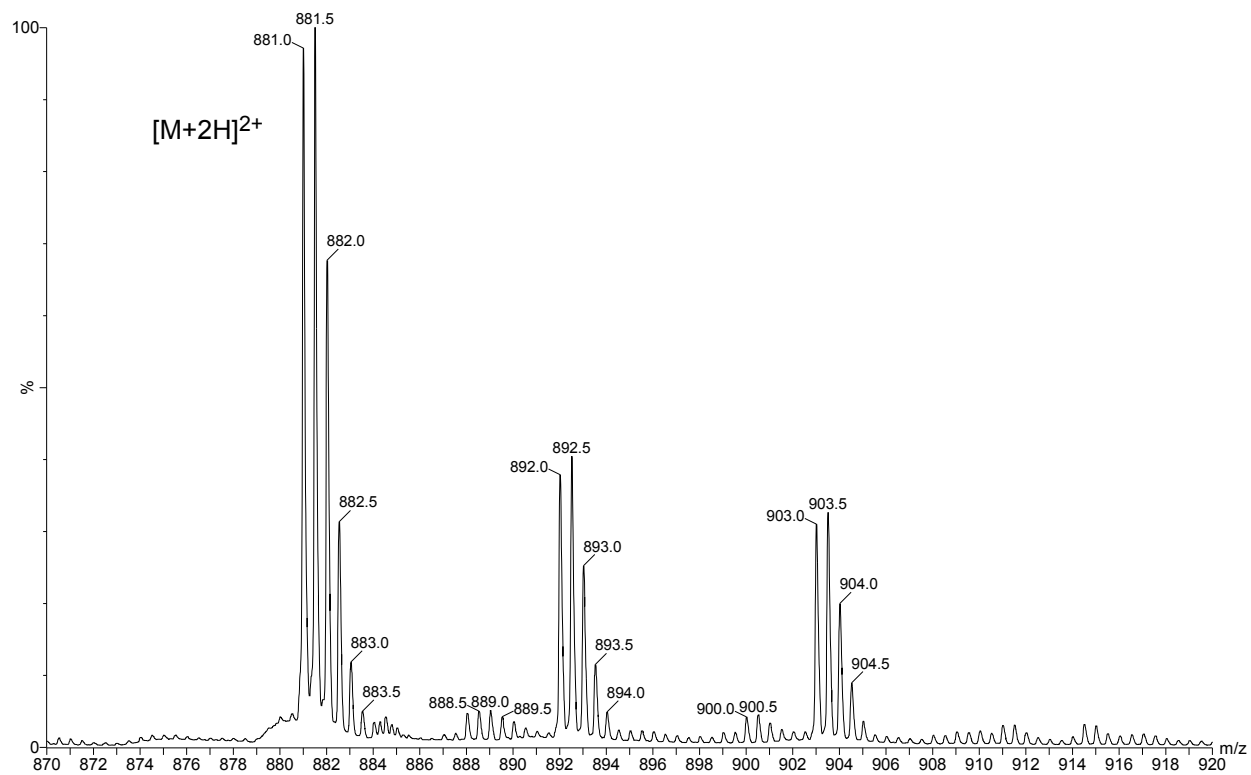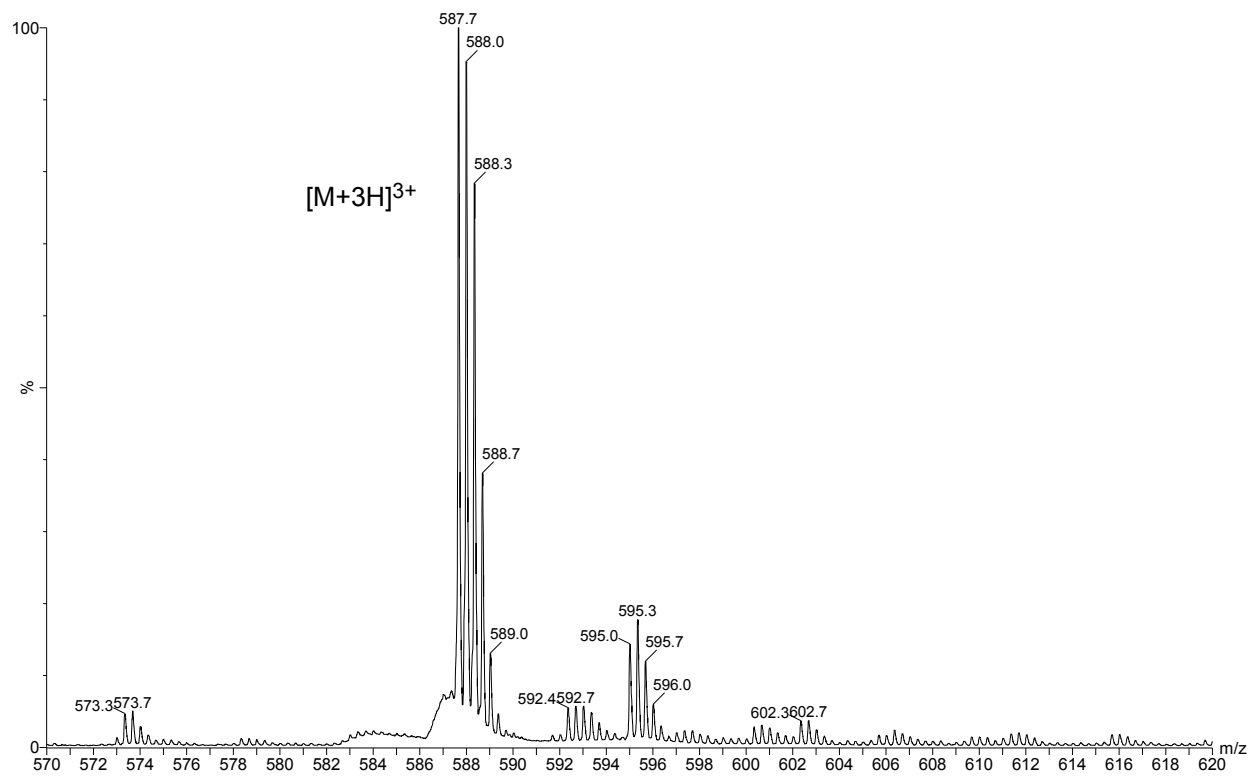



**<sup>1</sup>H NMR of macrocyclic β-sheet peptide 1cit, 2 mM in 100 mM deuterioacetate buffer in D<sub>2</sub>O at 500 MHz and 298 K**

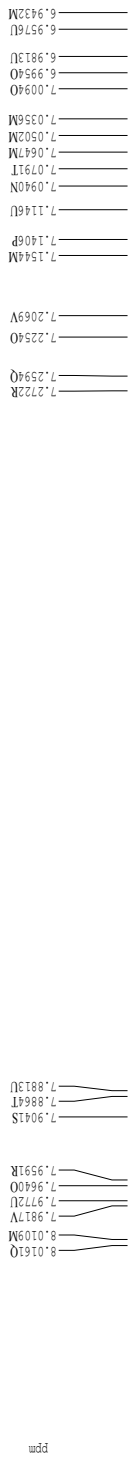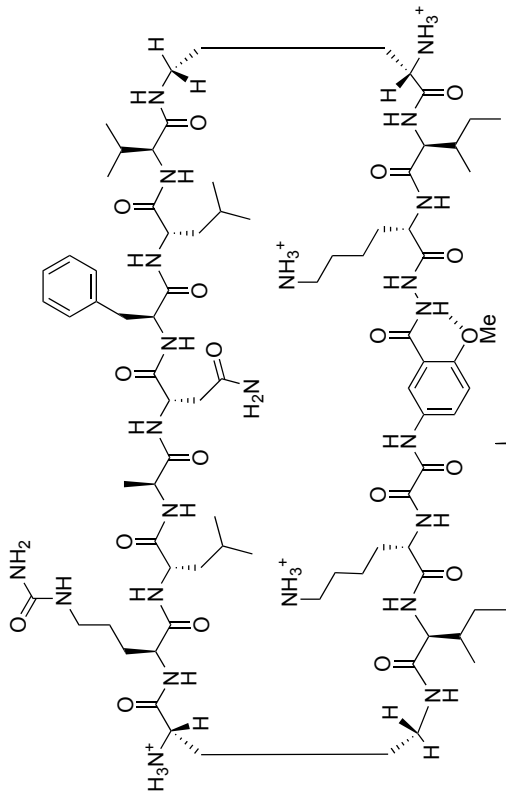

Current Data Parameters  
 Name: 20110207\_2M\_1  
 Date: 20110208  
 Time: 10:23:33  
 File: 20110208\_1  
 F2 - Acquisition Parameters  
 Date\_: 20110208  
 Time\_: 10:23:33  
 File\_: 20110208\_1  
 F2 - Processing parameters  
 SI: 32768  
 SF: 500.1364516 MHz  
 DS: 4  
 SC: 0.10000000 sec  
 SS: 0.20000000 sec  
 AS: 0.20000000 sec  
 MS: 0.20000000 sec  
 AC: 0.20000000 sec  
 GC: 0.20000000 sec  
 PC: 1.00  
 D1: 1.00  
 D2: 1.00  
 D3: 1.00  
 D4: 1.00  
 D5: 1.00  
 D6: 1.00  
 D7: 1.00  
 D8: 1.00  
 D9: 1.00  
 D10: 1.00  
 D11: 1.00  
 D12: 1.00  
 D13: 1.00  
 D14: 1.00  
 D15: 1.00  
 D16: 1.00  
 D17: 1.00  
 D18: 1.00  
 D19: 1.00  
 D20: 1.00  
 D21: 1.00  
 D22: 1.00  
 D23: 1.00  
 D24: 1.00  
 D25: 1.00  
 D26: 1.00  
 D27: 1.00  
 D28: 1.00  
 D29: 1.00  
 D30: 1.00  
 D31: 1.00  
 D32: 1.00  
 D33: 1.00  
 D34: 1.00  
 D35: 1.00  
 D36: 1.00  
 D37: 1.00  
 D38: 1.00  
 D39: 1.00  
 D40: 1.00  
 D41: 1.00  
 D42: 1.00  
 D43: 1.00  
 D44: 1.00  
 D45: 1.00  
 D46: 1.00  
 D47: 1.00  
 D48: 1.00  
 D49: 1.00  
 D50: 1.00  
 D51: 1.00  
 D52: 1.00  
 D53: 1.00  
 D54: 1.00  
 D55: 1.00  
 D56: 1.00  
 D57: 1.00  
 D58: 1.00  
 D59: 1.00  
 D60: 1.00  
 D61: 1.00  
 D62: 1.00  
 D63: 1.00  
 D64: 1.00  
 D65: 1.00  
 D66: 1.00  
 D67: 1.00  
 D68: 1.00  
 D69: 1.00  
 D70: 1.00  
 D71: 1.00  
 D72: 1.00  
 D73: 1.00  
 D74: 1.00  
 D75: 1.00  
 D76: 1.00  
 D77: 1.00  
 D78: 1.00  
 D79: 1.00  
 D80: 1.00  
 D81: 1.00  
 D82: 1.00  
 D83: 1.00  
 D84: 1.00  
 D85: 1.00  
 D86: 1.00  
 D87: 1.00  
 D88: 1.00  
 D89: 1.00  
 D90: 1.00  
 D91: 1.00  
 D92: 1.00  
 D93: 1.00  
 D94: 1.00  
 D95: 1.00  
 D96: 1.00  
 D97: 1.00  
 D98: 1.00  
 D99: 1.00  
 D100: 1.00  
 D101: 1.00  
 D102: 1.00  
 D103: 1.00  
 D104: 1.00  
 D105: 1.00  
 D106: 1.00  
 D107: 1.00  
 D108: 1.00  
 D109: 1.00  
 D110: 1.00  
 D111: 1.00  
 D112: 1.00  
 D113: 1.00  
 D114: 1.00  
 D115: 1.00  
 D116: 1.00  
 D117: 1.00  
 D118: 1.00  
 D119: 1.00  
 D120: 1.00  
 D121: 1.00  
 D122: 1.00  
 D123: 1.00  
 D124: 1.00  
 D125: 1.00  
 D126: 1.00  
 D127: 1.00  
 D128: 1.00  
 D129: 1.00  
 D130: 1.00  
 D131: 1.00  
 D132: 1.00  
 D133: 1.00  
 D134: 1.00  
 D135: 1.00  
 D136: 1.00  
 D137: 1.00  
 D138: 1.00  
 D139: 1.00  
 D140: 1.00  
 D141: 1.00  
 D142: 1.00  
 D143: 1.00  
 D144: 1.00  
 D145: 1.00  
 D146: 1.00  
 D147: 1.00  
 D148: 1.00  
 D149: 1.00  
 D150: 1.00  
 D151: 1.00  
 D152: 1.00  
 D153: 1.00  
 D154: 1.00  
 D155: 1.00  
 D156: 1.00  
 D157: 1.00  
 D158: 1.00  
 D159: 1.00  
 D160: 1.00  
 D161: 1.00  
 D162: 1.00  
 D163: 1.00  
 D164: 1.00  
 D165: 1.00  
 D166: 1.00  
 D167: 1.00  
 D168: 1.00  
 D169: 1.00  
 D170: 1.00  
 D171: 1.00  
 D172: 1.00  
 D173: 1.00  
 D174: 1.00  
 D175: 1.00  
 D176: 1.00  
 D177: 1.00  
 D178: 1.00  
 D179: 1.00  
 D180: 1.00  
 D181: 1.00  
 D182: 1.00  
 D183: 1.00  
 D184: 1.00  
 D185: 1.00  
 D186: 1.00  
 D187: 1.00  
 D188: 1.00  
 D189: 1.00  
 D190: 1.00  
 D191: 1.00  
 D192: 1.00  
 D193: 1.00  
 D194: 1.00  
 D195: 1.00  
 D196: 1.00  
 D197: 1.00  
 D198: 1.00  
 D199: 1.00  
 D200: 1.00  
 D201: 1.00  
 D202: 1.00  
 D203: 1.00  
 D204: 1.00  
 D205: 1.00  
 D206: 1.00  
 D207: 1.00  
 D208: 1.00  
 D209: 1.00  
 D210: 1.00  
 D211: 1.00  
 D212: 1.00  
 D213: 1.00  
 D214: 1.00  
 D215: 1.00  
 D216: 1.00  
 D217: 1.00  
 D218: 1.00  
 D219: 1.00  
 D220: 1.00  
 D221: 1.00  
 D222: 1.00  
 D223: 1.00  
 D224: 1.00  
 D225: 1.00  
 D226: 1.00  
 D227: 1.00  
 D228: 1.00  
 D229: 1.00  
 D230: 1.00  
 D231: 1.00  
 D232: 1.00  
 D233: 1.00  
 D234: 1.00  
 D235: 1.00  
 D236: 1.00  
 D237: 1.00  
 D238: 1.00  
 D239: 1.00  
 D240: 1.00  
 D241: 1.00  
 D242: 1.00  
 D243: 1.00  
 D244: 1.00  
 D245: 1.00  
 D246: 1.00  
 D247: 1.00  
 D248: 1.00  
 D249: 1.00  
 D250: 1.00  
 D251: 1.00  
 D252: 1.00  
 D253: 1.00  
 D254: 1.00  
 D255: 1.00  
 D256: 1.00  
 D257: 1.00  
 D258: 1.00  
 D259: 1.00  
 D260: 1.00  
 D261: 1.00  
 D262: 1.00  
 D263: 1.00  
 D264: 1.00  
 D265: 1.00  
 D266: 1.00  
 D267: 1.00  
 D268: 1.00  
 D269: 1.00  
 D270: 1.00  
 D271: 1.00  
 D272: 1.00  
 D273: 1.00  
 D274: 1.00  
 D275: 1.00  
 D276: 1.00  
 D277: 1.00  
 D278: 1.00  
 D279: 1.00  
 D280: 1.00  
 D281: 1.00  
 D282: 1.00  
 D283: 1.00  
 D284: 1.00  
 D285: 1.00  
 D286: 1.00  
 D287: 1.00  
 D288: 1.00  
 D289: 1.00  
 D290: 1.00  
 D291: 1.00  
 D292: 1.00  
 D293: 1.00  
 D294: 1.00  
 D295: 1.00  
 D296: 1.00  
 D297: 1.00  
 D298: 1.00  
 D299: 1.00  
 D300: 1.00  
 D301: 1.00  
 D302: 1.00  
 D303: 1.00  
 D304: 1.00  
 D305: 1.00  
 D306: 1.00  
 D307: 1.00  
 D308: 1.00  
 D309: 1.00  
 D310: 1.00  
 D311: 1.00  
 D312: 1.00  
 D313: 1.00  
 D314: 1.00  
 D315: 1.00  
 D316: 1.00  
 D317: 1.00  
 D318: 1.00  
 D319: 1.00  
 D320: 1.00  
 D321: 1.00  
 D322: 1.00  
 D323: 1.00  
 D324: 1.00  
 D325: 1.00  
 D326: 1.00  
 D327: 1.00  
 D328: 1.00  
 D329: 1.00  
 D330: 1.00  
 D331: 1.00  
 D332: 1.00  
 D333: 1.00  
 D334: 1.00  
 D335: 1.00  
 D336: 1.00  
 D337: 1.00  
 D338: 1.00  
 D339: 1.00  
 D340: 1.00  
 D341: 1.00  
 D342: 1.00  
 D343: 1.00  
 D344: 1.00  
 D345: 1.00  
 D346: 1.00  
 D347: 1.00  
 D348: 1.00  
 D349: 1.00  
 D350: 1.00  
 D351: 1.00  
 D352: 1.00  
 D353: 1.00  
 D354: 1.00  
 D355: 1.00  
 D356: 1.00  
 D357: 1.00  
 D358: 1.00  
 D359: 1.00  
 D360: 1.00  
 D361: 1.00  
 D362: 1.00  
 D363: 1.00  
 D364: 1.00  
 D365: 1.00  
 D366: 1.00  
 D367: 1.00  
 D368: 1.00  
 D369: 1.00  
 D370: 1.00  
 D371: 1.00  
 D372: 1.00  
 D373: 1.00  
 D374: 1.00  
 D375: 1.00  
 D376: 1.00  
 D377: 1.00  
 D378: 1.00  
 D379: 1.00  
 D380: 1.00  
 D381: 1.00  
 D382: 1.00  
 D383: 1.00  
 D384: 1.00  
 D385: 1.00  
 D386: 1.00  
 D387: 1.00  
 D388: 1.00  
 D389: 1.00  
 D390: 1.00  
 D391: 1.00  
 D392: 1.00  
 D393: 1.00  
 D394: 1.00  
 D395: 1.00  
 D396: 1.00  
 D397: 1.00  
 D398: 1.00  
 D399: 1.00  
 D400: 1.00  
 D401: 1.00  
 D402: 1.00  
 D403: 1.00  
 D404: 1.00  
 D405: 1.00  
 D406: 1.00  
 D407: 1.00  
 D408: 1.00  
 D409: 1.00  
 D410: 1.00  
 D411: 1.00  
 D412: 1.00  
 D413: 1.00  
 D414: 1.00  
 D415: 1.00  
 D416: 1.00  
 D417: 1.00  
 D418: 1.00  
 D419: 1.00  
 D420: 1.00  
 D421: 1.00  
 D422: 1.00  
 D423: 1.00  
 D424: 1.00  
 D425: 1.00  
 D426: 1.00  
 D427: 1.00  
 D428: 1.00  
 D429: 1.00  
 D430: 1.00  
 D431: 1.00  
 D432: 1.00  
 D433: 1.00  
 D434: 1.00  
 D435: 1.00  
 D436: 1.00  
 D437: 1.00  
 D438: 1.00  
 D439: 1.00  
 D440: 1.00  
 D441: 1.00  
 D442: 1.00  
 D443: 1.00  
 D444: 1.00  
 D445: 1.00  
 D446: 1.00  
 D447: 1.00  
 D448: 1.00  
 D449: 1.00  
 D450: 1.00  
 D451: 1.00  
 D452: 1.00  
 D453: 1.00  
 D454: 1.00  
 D455: 1.00  
 D456: 1.00  
 D457: 1.00  
 D458: 1.00  
 D459: 1.00  
 D460: 1.00  
 D461: 1.00  
 D462: 1.00  
 D463: 1.00  
 D464: 1.00  
 D465: 1.00  
 D466: 1.00  
 D467: 1.00  
 D468: 1.00  
 D469: 1.00  
 D470: 1.00  
 D471: 1.00  
 D472: 1.00  
 D473: 1.00  
 D474: 1.00  
 D475: 1.00  
 D476: 1.00  
 D477: 1.00  
 D478: 1.00  
 D479: 1.00  
 D480: 1.00  
 D481: 1.00  
 D482: 1.00  
 D483: 1.00  
 D484: 1.00  
 D485: 1.00  
 D486: 1.00  
 D487: 1.00  
 D488: 1.00  
 D489: 1.00  
 D490: 1.00  
 D491: 1.00  
 D492: 1.00  
 D493: 1.00  
 D494: 1.00  
 D495: 1.00  
 D496: 1.00  
 D497: 1.00  
 D498: 1.00  
 D499: 1.00  
 D500: 1.00  
 D501: 1.00  
 D502: 1.00  
 D503: 1.00  
 D504: 1.00  
 D505: 1.00  
 D506: 1.00  
 D507: 1.00  
 D508: 1.00  
 D509: 1.00  
 D510: 1.00  
 D511: 1.00  
 D512: 1.00  
 D513: 1.00  
 D514: 1.00  
 D515: 1.00  
 D516: 1.00  
 D517: 1.00  
 D518: 1.00  
 D519: 1.00  
 D520: 1.00  
 D521: 1.00  
 D522: 1.00  
 D523: 1.00  
 D524: 1.00  
 D525: 1.00  
 D526: 1.00  
 D527: 1.00  
 D528: 1.00  
 D529: 1.00  
 D530: 1.00  
 D531: 1.00  
 D532: 1.00  
 D533: 1.00  
 D534: 1.00  
 D535: 1.00  
 D536: 1.00  
 D537: 1.00  
 D538: 1.00  
 D539: 1.00  
 D540: 1.00  
 D541: 1.00  
 D542: 1.00  
 D543: 1.00  
 D544: 1.00  
 D545: 1.00  
 D546: 1.00  
 D547: 1.00  
 D548: 1.00  
 D549: 1.00  
 D550: 1.00  
 D551: 1.00  
 D552: 1.00  
 D553: 1.00  
 D554: 1.00  
 D555: 1.00  
 D556: 1.00  
 D557: 1.00  
 D558: 1.00  
 D559: 1.00  
 D560: 1.00  
 D561: 1.00  
 D562: 1.00  
 D563: 1.00  
 D564: 1.00  
 D565: 1.00  
 D566: 1.00  
 D567: 1.00  
 D568: 1.00  
 D569: 1.00  
 D570: 1.00  
 D571: 1.00  
 D572: 1.00  
 D573: 1.00  
 D574: 1.00  
 D575: 1.00  
 D576: 1.00  
 D577: 1.00  
 D578: 1.00  
 D579: 1.00  
 D580: 1.00  
 D581: 1.00  
 D582: 1.00  
 D583: 1.00  
 D584: 1.00  
 D585: 1.00  
 D586: 1.00  
 D587: 1.00  
 D588: 1.00  
 D589: 1.00  
 D590: 1.00  
 D591: 1.00  
 D592: 1.00  
 D593: 1.00  
 D594: 1.00  
 D595: 1.00  
 D596: 1.00  
 D597: 1.00  
 D598: 1.00  
 D599: 1.00  
 D600: 1.00  
 D601: 1.00  
 D602: 1.00  
 D603: 1.00  
 D604: 1.00  
 D605: 1.00  
 D606: 1.00  
 D607: 1.00  
 D608: 1.00  
 D609: 1.00  
 D610: 1.00  
 D611: 1.00  
 D612: 1.00  
 D613: 1.00  
 D614: 1.00  
 D615: 1.00  
 D616: 1.00  
 D617: 1.00  
 D618: 1.00  
 D619: 1.00  
 D620: 1.00  
 D621: 1.00  
 D622: 1.00  
 D623: 1.00  
 D624: 1.00  
 D625: 1.00  
 D626: 1.00  
 D627: 1.00  
 D628: 1.00  
 D629: 1.00  
 D630: 1.00  
 D631: 1.00  
 D632: 1.00  
 D633: 1.00  
 D634: 1.00  
 D635: 1.00  
 D636: 1.00  
 D637: 1.00  
 D638: 1.00  
 D639: 1.00  
 D640: 1.00  
 D641: 1.00  
 D642: 1.00  
 D643: 1.00  
 D644: 1.00  
 D645: 1.00  
 D646: 1.00  
 D647: 1.00  
 D648: 1.00  
 D649: 1.00  
 D650: 1.00  
 D651: 1.00  
 D652: 1.00  
 D653: 1.00  
 D654: 1.00  
 D655: 1.00  
 D656: 1.00  
 D657: 1.00  
 D658: 1.00  
 D659: 1.00  
 D660: 1.00  
 D661: 1.00  
 D662: 1.00  
 D663: 1.00  
 D664: 1.00  
 D665: 1.00  
 D666: 1.00  
 D667: 1.00  
 D668: 1.00  
 D669: 1.00  
 D670: 1.00  
 D671: 1.00  
 D672: 1.00  
 D673: 1.00  
 D674: 1.00  
 D675: 1.00  
 D676: 1.00  
 D677: 1.00  
 D678: 1.00  
 D679: 1.00  
 D680: 1.00  
 D681: 1.00  
 D682: 1.00  
 D683: 1.00  
 D684: 1.00  
 D685: 1.00  
 D686: 1.00  
 D687: 1.00  
 D688: 1.00  
 D689: 1.00  
 D690: 1.00  
 D691: 1.00  
 D692: 1.00  
 D693: 1.00  
 D694: 1.00  
 D695: 1.00  
 D696: 1.00  
 D697: 1.00  
 D698: 1.00  
 D699: 1.00  
 D700: 1.00  
 D701: 1.00  
 D702: 1.00  
 D703: 1.00  
 D704: 1.00  
 D705: 1.00  
 D706: 1.00  
 D707: 1.00  
 D708: 1.00  
 D709: 1.00  
 D710: 1.00  
 D711: 1.00  
 D712: 1.00  
 D713: 1.00  
 D714: 1.00  
 D715: 1.00  
 D716: 1.00  
 D717: 1.00  
 D718: 1.00  
 D719: 1.00  
 D720: 1.00  
 D721: 1.00  
 D722: 1.00  
 D723: 1.00  
 D724: 1.00  
 D725: 1.00  
 D726: 1.00  
 D727: 1.00  
 D728: 1.00  
 D729: 1.00  
 D730: 1.00  
 D731: 1.00  
 D732: 1.00  
 D733: 1.00  
 D734: 1.00  
 D735: 1.00  
 D736: 1.00  
 D737: 1.00  
 D738: 1.00  
 D739: 1.00  
 D740: 1.00  
 D741: 1.00  
 D742: 1.00  
 D743: 1.00  
 D744: 1.00  
 D745: 1.00  
 D746: 1.00  
 D747: 1.00  
 D748: 1.00  
 D749: 1.00  
 D750: 1.00  
 D751: 1.00  
 D752: 1.00  
 D753: 1.00  
 D754: 1.00  
 D755: 1.00  
 D756: 1.00  
 D757: 1.00  
 D758: 1.00  
 D759: 1.00  
 D760: 1.00  
 D761: 1.00  
 D762: 1.00  
 D763: 1.00  
 D764: 1.00  
 D765: 1.00  
 D766: 1.00  
 D767: 1.00  
 D768: 1.00  
 D769: 1.00  
 D770: 1.00  
 D771: 1.00  
 D772: 1.00  
 D773: 1.00  
 D774: 1.00  
 D775: 1.00  
 D776: 1.00  
 D777: 1.00  
 D778: 1.00  
 D779: 1.00  
 D780: 1.00  
 D781: 1.00  
 D782: 1.00  
 D783: 1.00  
 D784: 1.00  
 D785: 1.00  
 D786: 1.00  
 D787: 1.00  
 D788: 1.00  
 D789: 1.00  
 D790: 1.00  
 D791: 1.00  
 D792: 1.00  
 D793: 1.00  
 D794: 1.00  
 D795: 1.00  
 D796: 1.00  
 D797: 1.00  
 D798: 1.00  
 D799: 1.00  
 D800: 1.00  
 D801: 1.00  
 D802: 1.00  
 D803: 1.00  
 D804: 1.00  
 D805: 1.00  
 D806: 1.00  
 D807: 1.00  
 D808: 1.00  
 D809: 1.00  
 D810: 1.00  
 D811: 1.00  
 D812: 1.00  
 D813: 1.00  
 D814: 1.00  
 D815: 1.00  
 D816: 1.00  
 D817: 1.00  
 D818: 1.00  
 D819: 1.00  
 D820: 1.00  
 D821: 1.00  
 D822: 1.00  
 D823: 1.00  
 D824: 1.00  
 D82









<sup>1</sup>H NMR 2D TOCSY of macrocyclic β-sheet peptide **1**<sub>Cit</sub> with 150-ms spin-lock mixing time  
2 mM in 100 mM deuterioacetate buffer in D<sub>2</sub>O at 500 MHz and 298 K

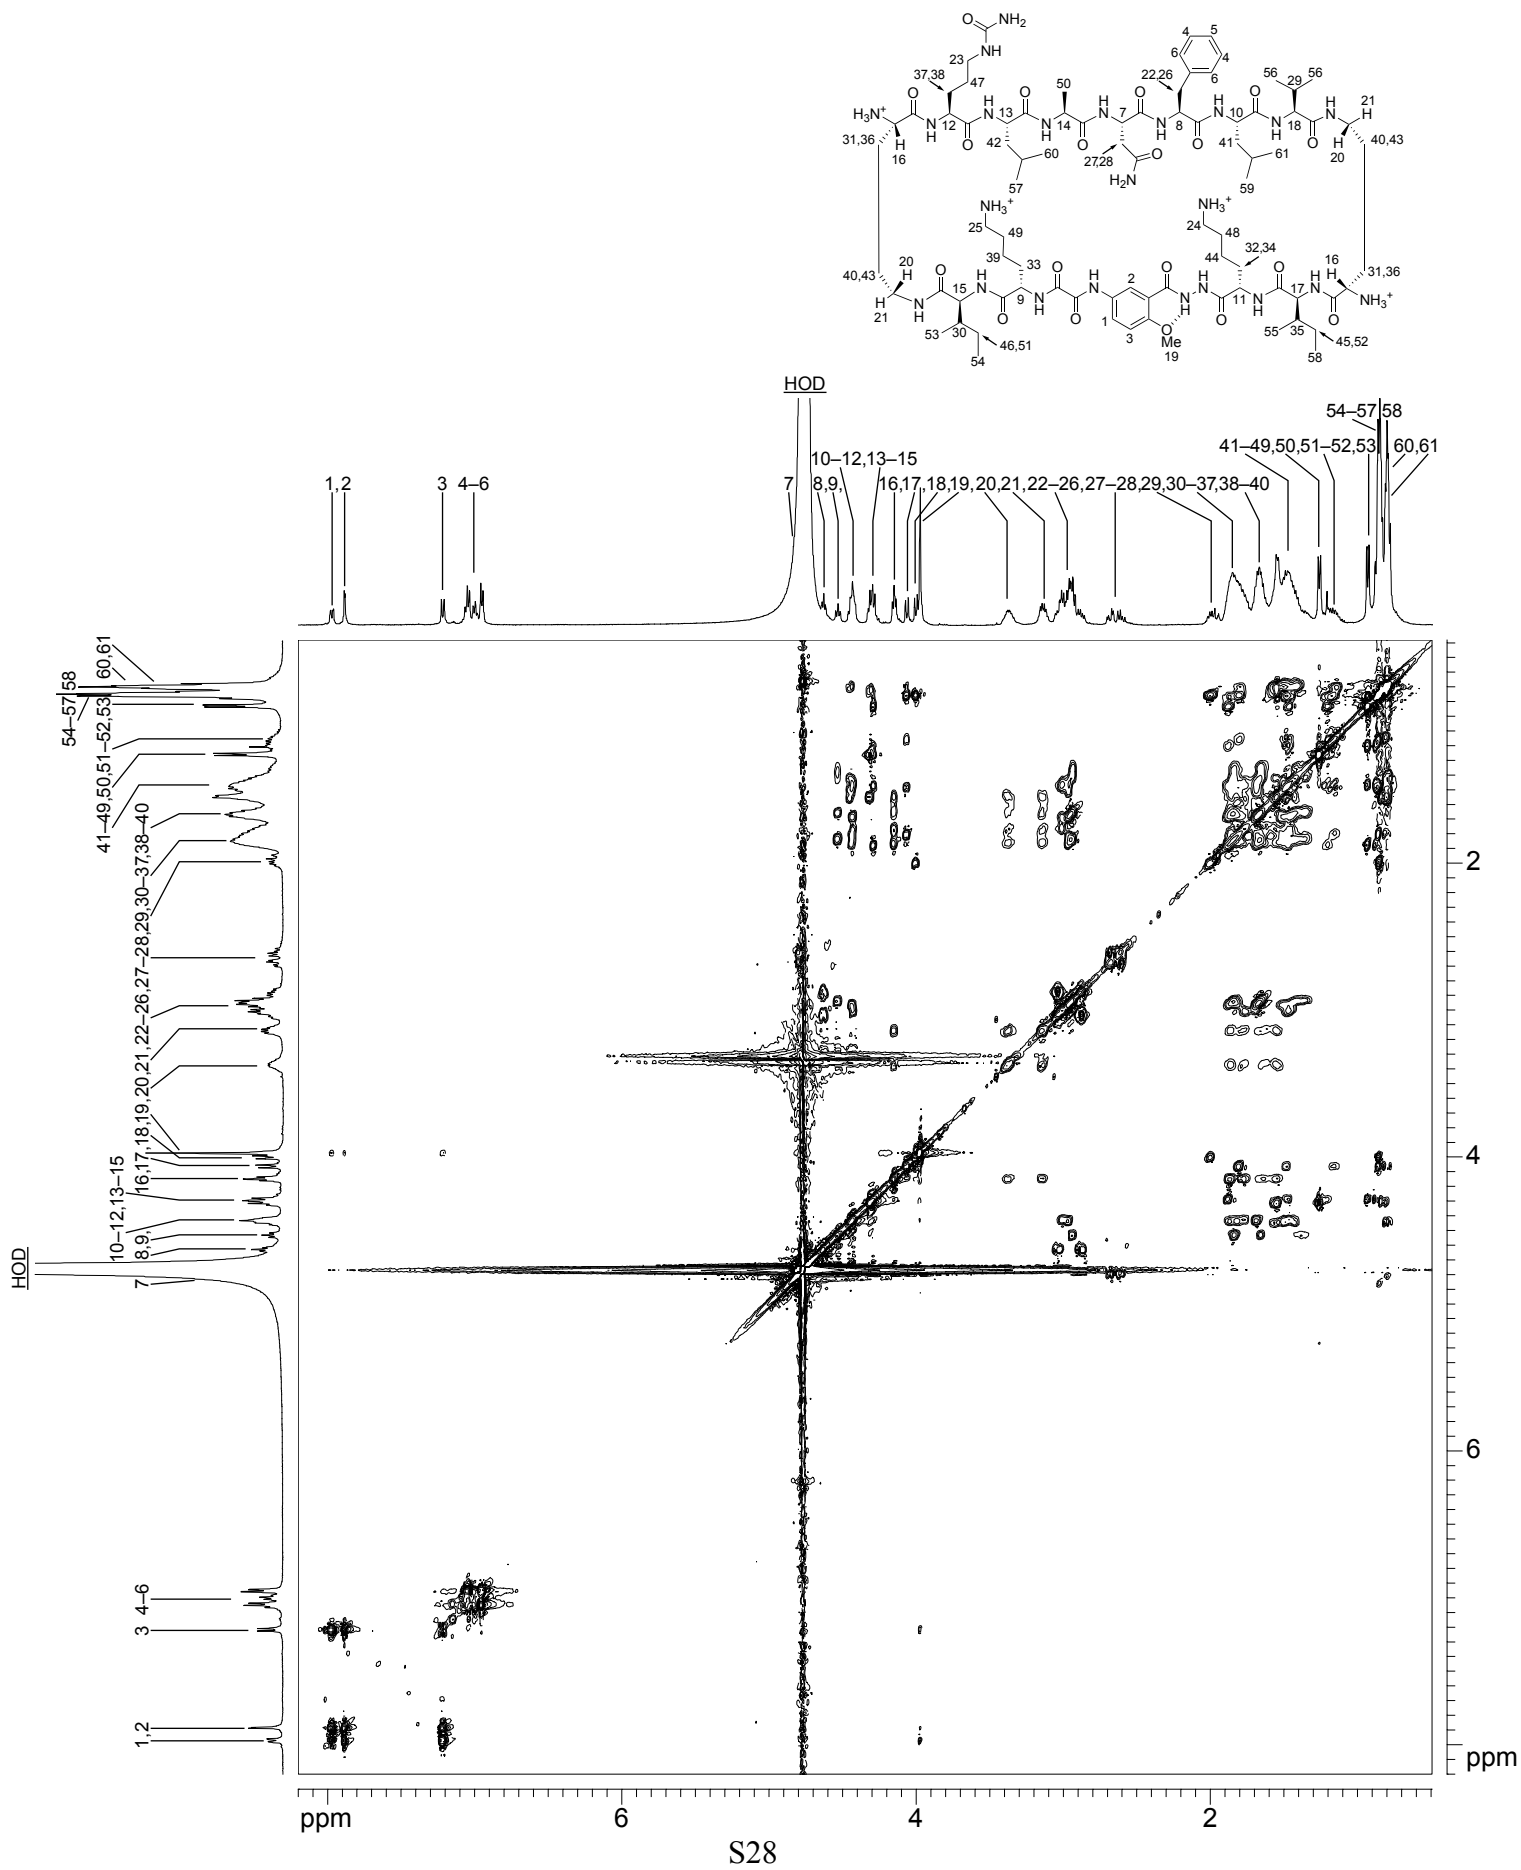

<sup>1</sup>H NMR 2D TOCSY of macrocyclic β-sheet peptide **1C<sub>it</sub>** with 150-ms spin-lock mixing time  
2 mM in 100 mM deuterioacetate buffer in D<sub>2</sub>O at 500 MHz and 298 K

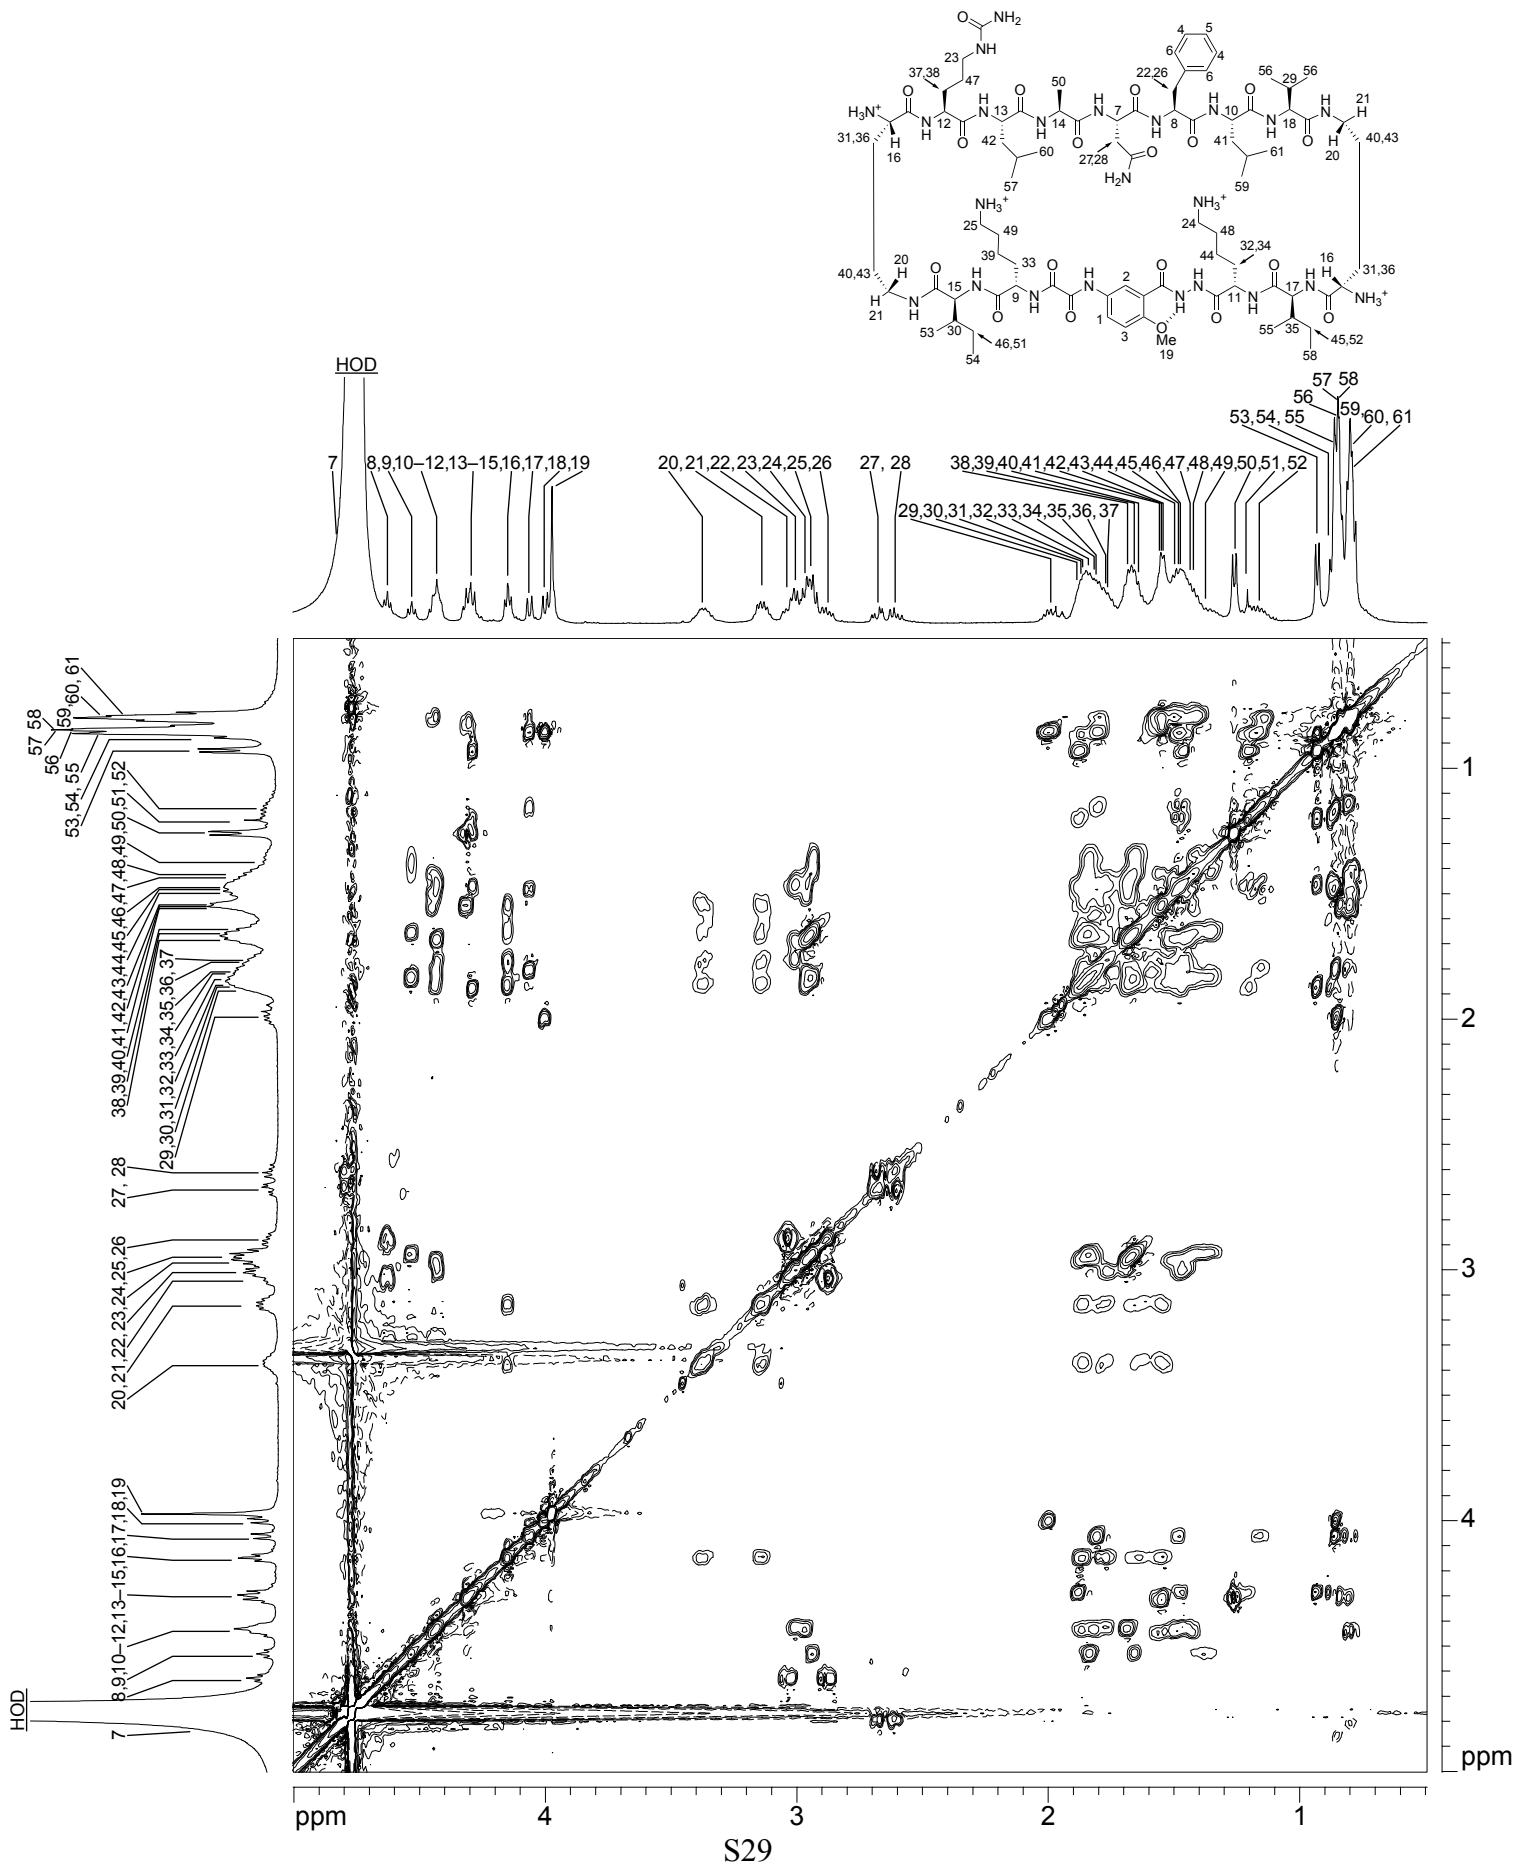

<sup>1</sup>H NMR 2D ROESY of macrocyclic β-sheet peptide **1**<sub>Cit</sub> with 100-ms spin-lock mixing time  
2 mM in 100 mM deuterioacetate buffer in D<sub>2</sub>O at 500 MHz and 298 K

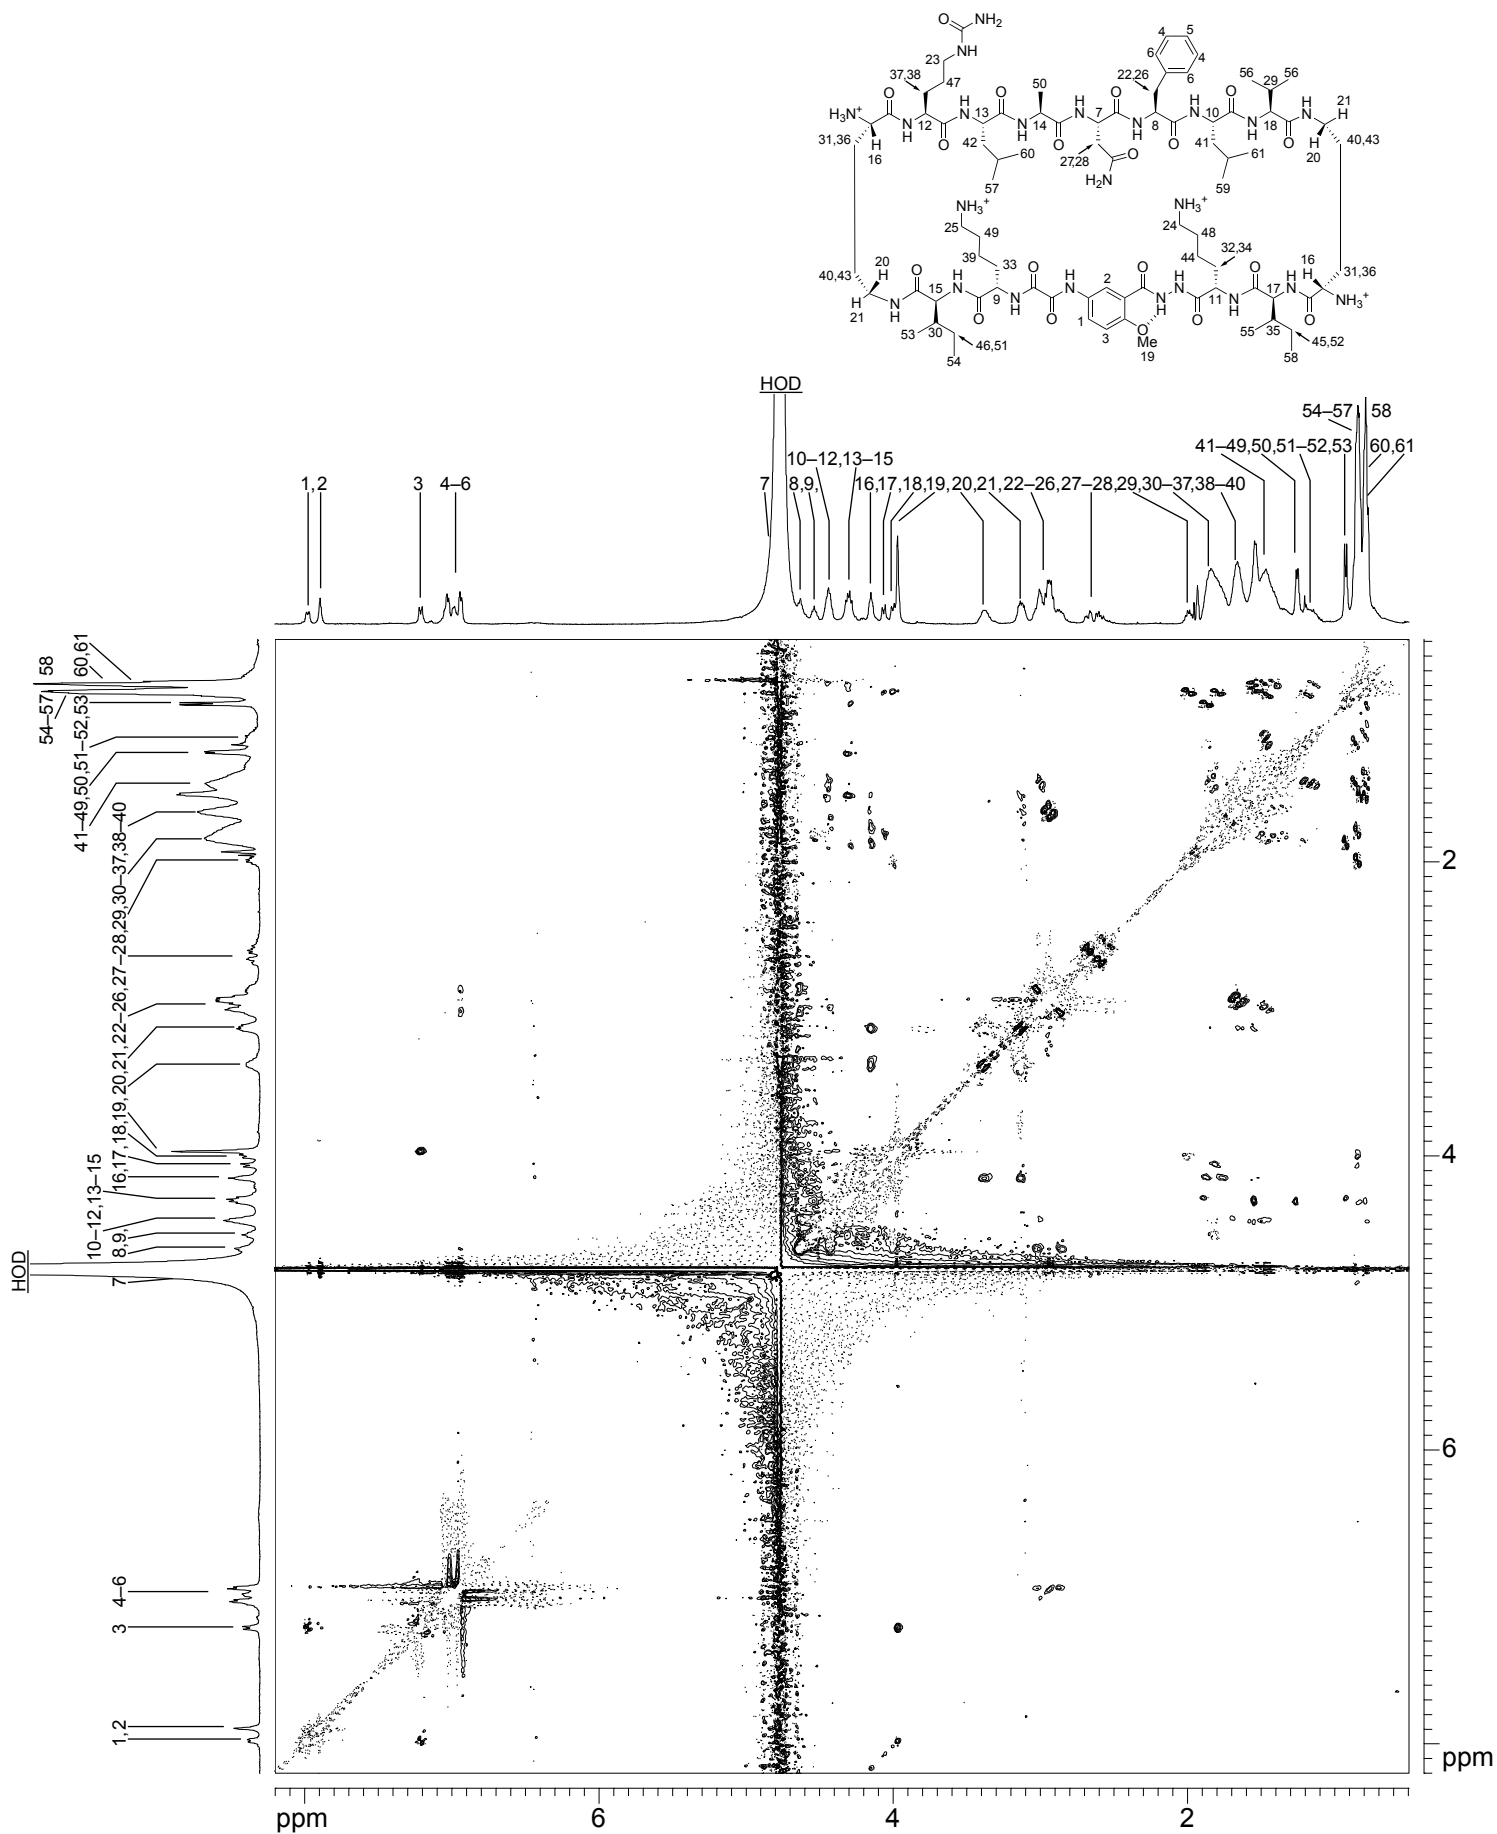

$^1\text{H}$  NMR 2D ROESY of macrocyclic  $\beta$ -sheet peptide **1**<sub>Cit</sub> with 100-ms spin-lock mixing time  
2 mM in 100 mM deuterioacetate buffer in D<sub>2</sub>O at 500 MHz and 298 K

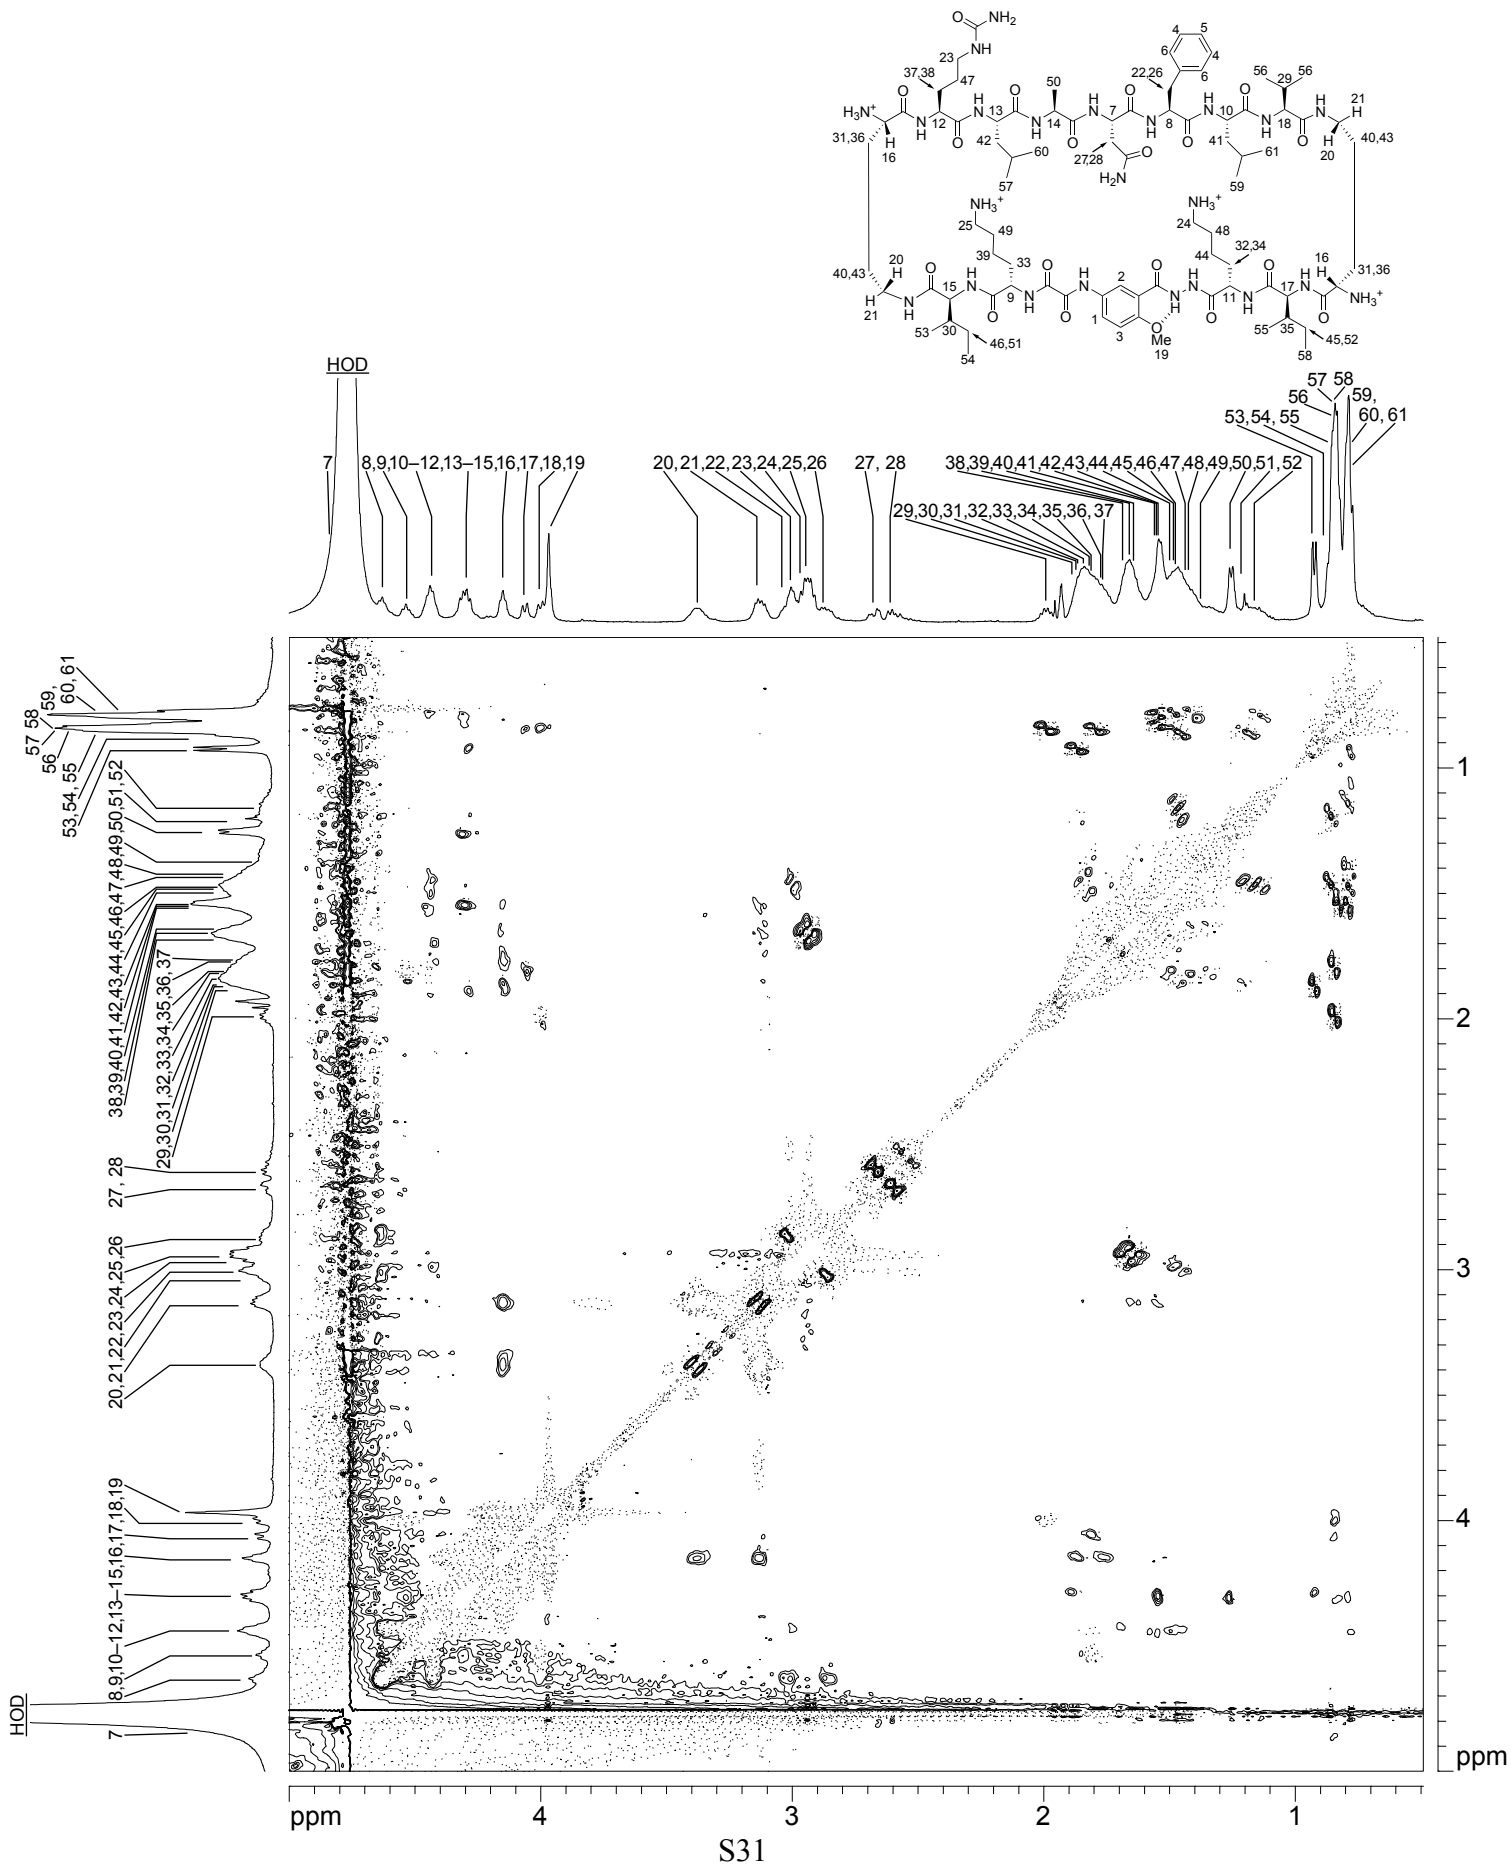

<sup>1</sup>H NMR of macrocyclic β-sheet peptide 1cit, 16 mM in 100 mM deuterioacetate buffer in D<sub>2</sub>O at 500 MHz and 298 K

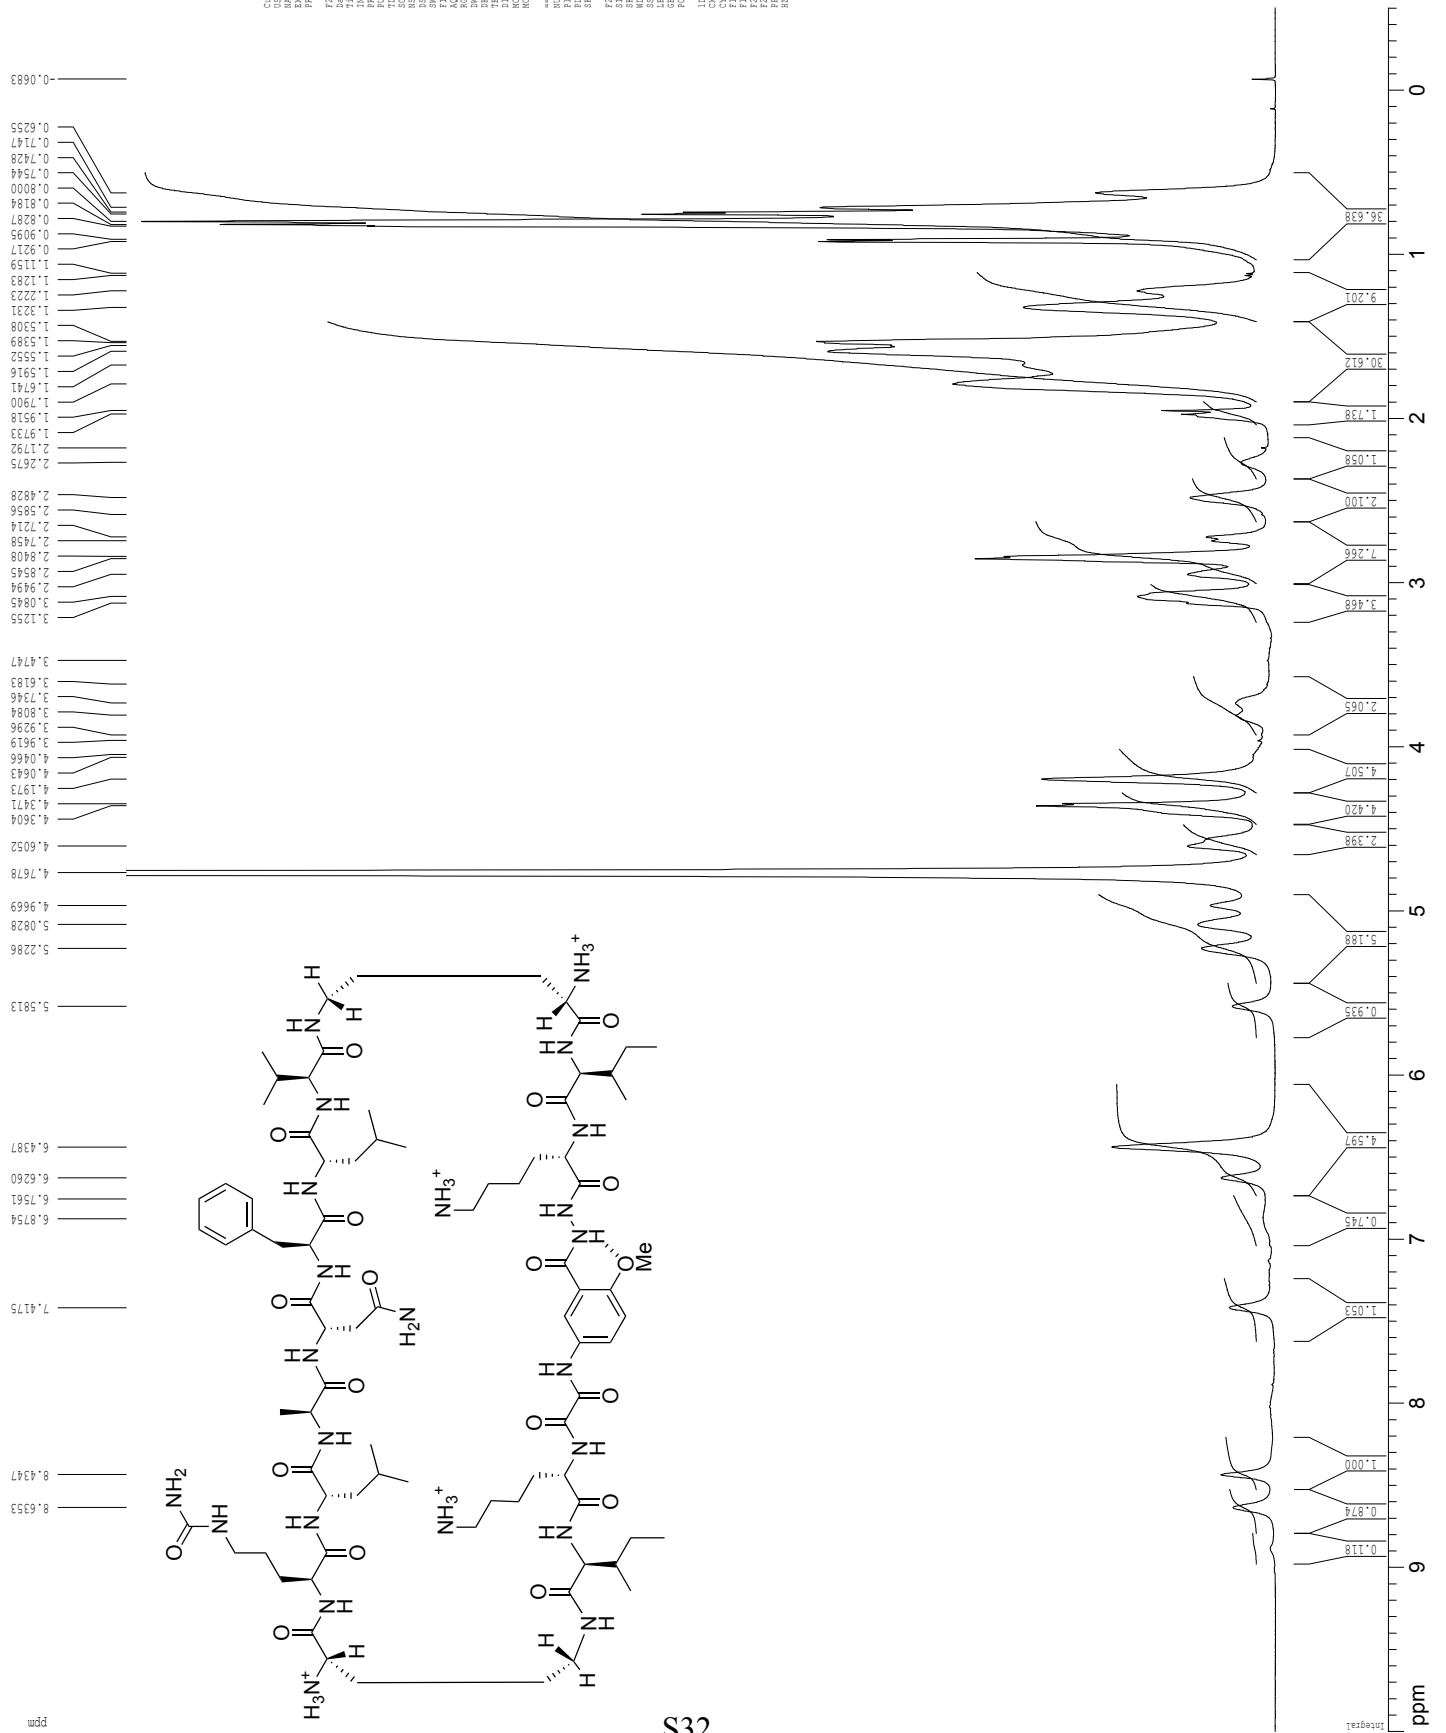

Current Data Parameters  
 USER jllow  
 EXPNO 1  
 PROCNO 1  
 F2 - Acquisition Parameters  
 Date\_ 20150903  
 Time 08:57:00  
 INSTRUM spect  
 PROBRG zgpg30  
 PULPROG zgpg30  
 TD 65536  
 SFO 500.1363015 MHz  
 DS 2  
 SWH 6503.2 Hz  
 FWHZ 0.198863 Hz  
 AQ 5.4998774 sec  
 RG 62.400 usec  
 DE 6.00 usec  
 D1 0.1000000 sec  
 NOISE 0.0000000 sec  
 PARRG 0.0100000 sec  
 CHANMEL F1  
 NUC1 13C  
 P1 7.50 usec  
 PL 0.00 dB  
 SFO 500.1363015 MHz  
 FWHZ 6535.6 Hz  
 SF 500.1363015 MHz  
 LB 0.30 Hz  
 SB 0  
 PC 4.00  
 13C NMR p1ac Parameters  
 CX 22.80 cm  
 CY 13.00 cm  
 CZ 13.00 cm  
 F1 500.1363015 MHz  
 F2 500.1363015 MHz  
 F3 500.1363015 MHz  
 PRGN 0.4683 ppm/cm  
 RECN 230.36451 Hz/cm

<sup>1</sup>H NMR of macrocyclic β-sheet peptide 1cit, 16 mM in 100 mM deuterioacetate buffer in D<sub>2</sub>O at 500 MHz and 298 K

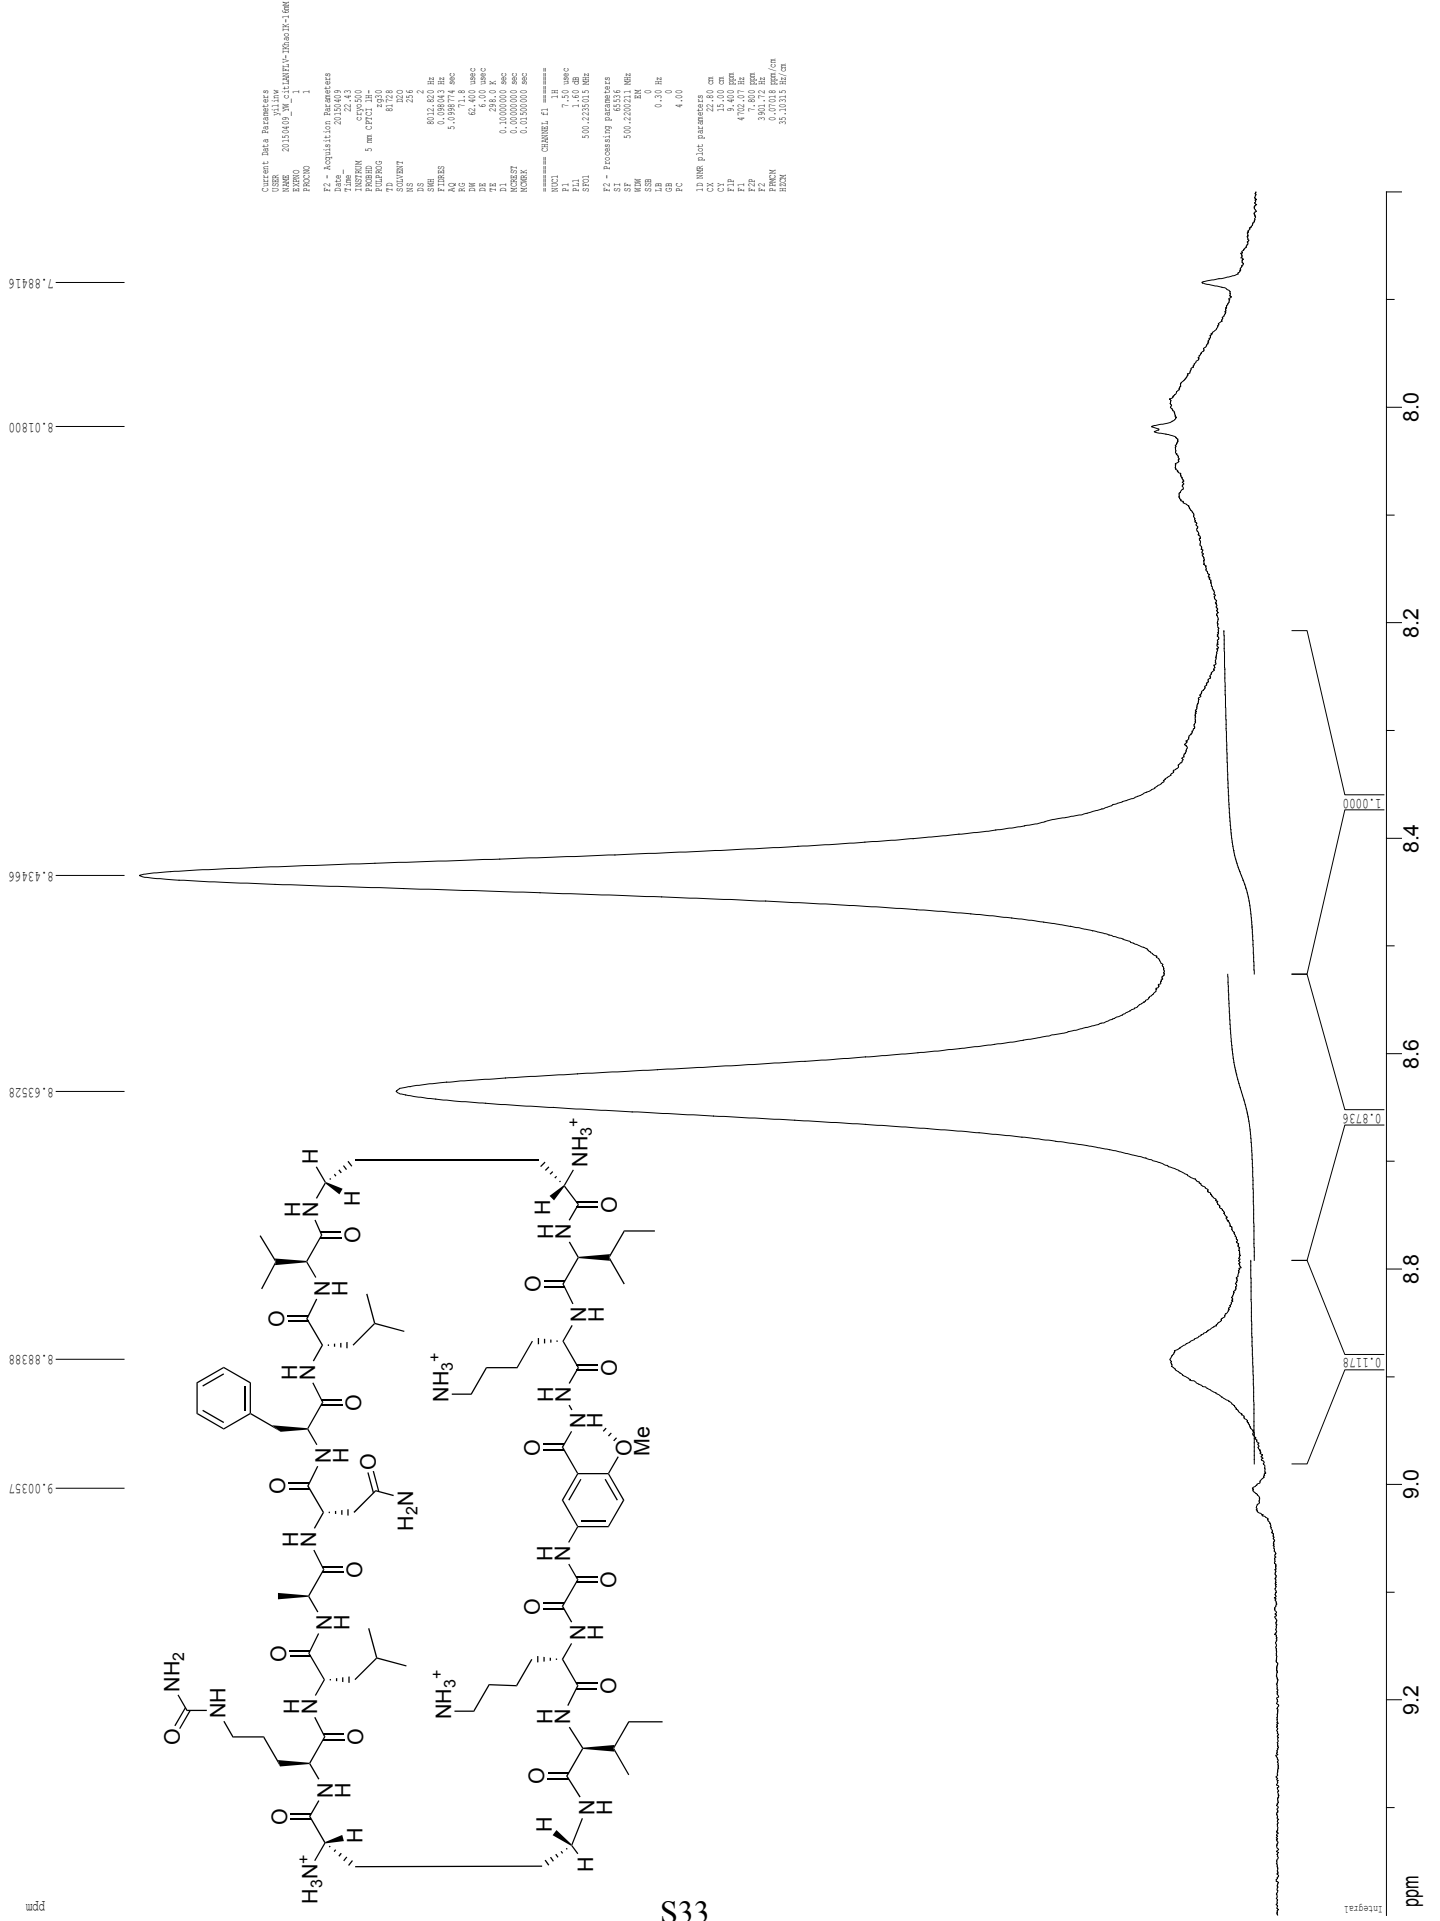

**<sup>1</sup>H NMR of macrocyclic β-sheet peptide 1cit, 16 mM in 100 mM deuterioacetate buffer in D<sub>2</sub>O at 500 MHz and 298 K**

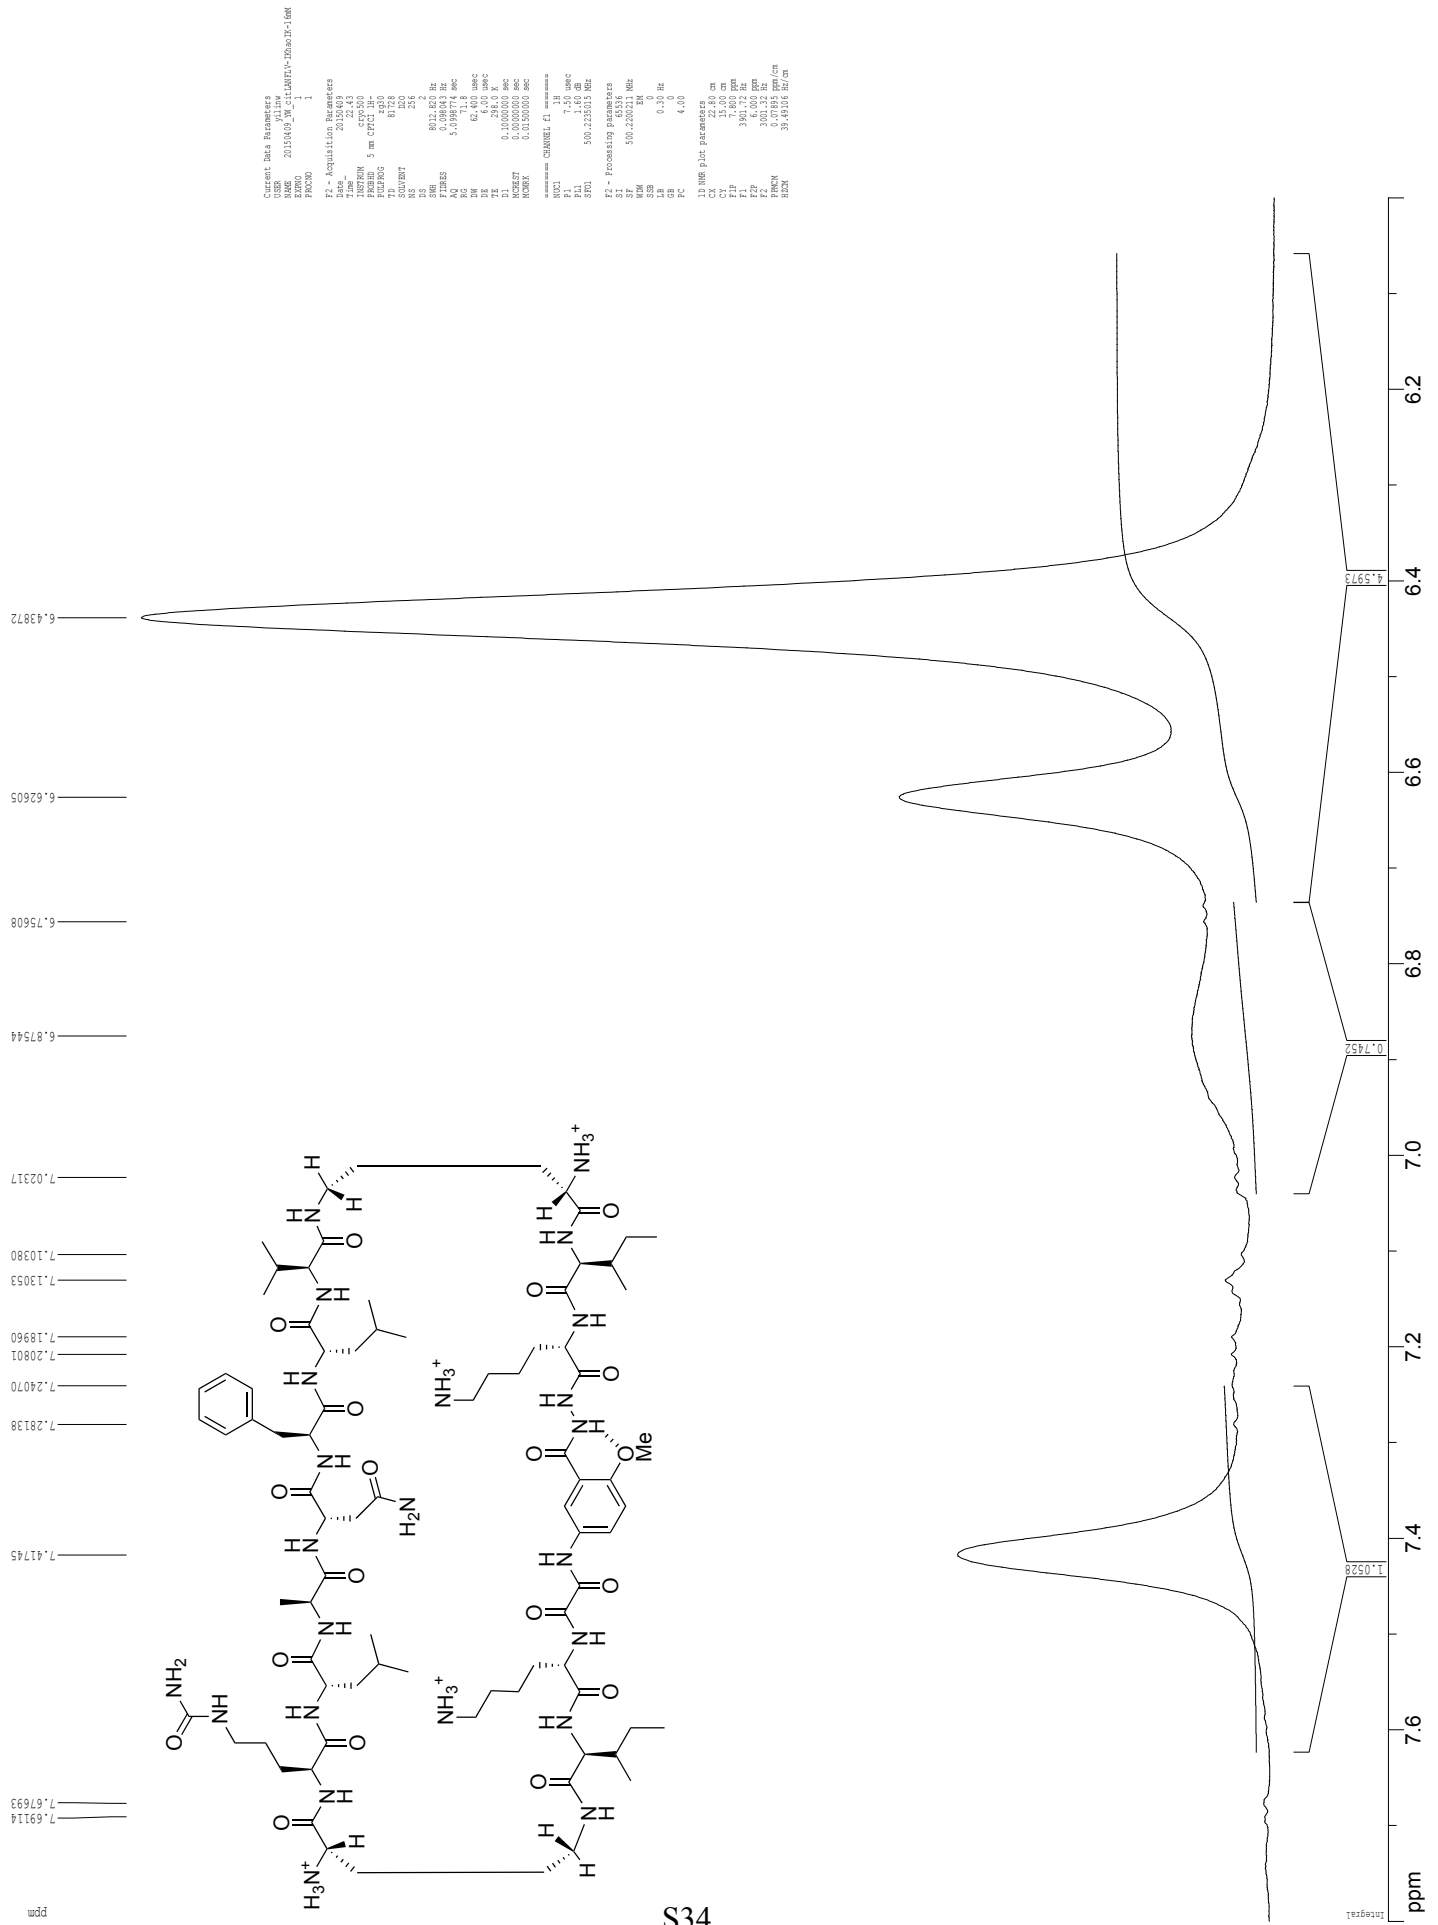

Current Data Parameters  
 USER jllw  
 EXPNO 1  
 PROCNO 1  
 F2 - Acquisition Parameters  
 Date\_ 20150909  
 Time 10:00:00  
 INSTRUM cty9000  
 PULPROG zgpg30  
 PRGNAME 3 m CFC1  
 TD 65536  
 FIDRES 0.1118  
 AQ 5.0  
 DS 2  
 SWH 8015.2 Hz  
 FWHM 0.198803 Hz  
 RMS 5.0998774 sec  
 AQ 62.400 usec  
 DE 6.00 usec  
 DI 0.10000000 sec  
 NUC1 13C  
 NUC2 1H  
 CHANNEL f1 13c  
 P1 7.50 usec  
 PL1 0.00 dB  
 SFO1 500.233013 MHz  
 F2 - Processing parameters  
 SI 65536  
 SF 500.233013 MHz  
 LB 0.30 Hz  
 GB 0  
 PC 4.00  
 LO 100 p1c Parameters  
 CX 22.80 cm  
 CY 3.00 cm  
 CZ 3.00 cm  
 F1 3901.72 Hz  
 F2 3901.72 Hz  
 F3 3901.72 Hz  
 PRGN 0.07895 ppm/cm  
 RCN 39.49116 Hz/cm



**<sup>1</sup>H NMR of macrocyclic β-sheet peptide 1cit, 16 mM in 100 mM deuterioacetate buffer in D<sub>2</sub>O at 500 MHz and 298 K**

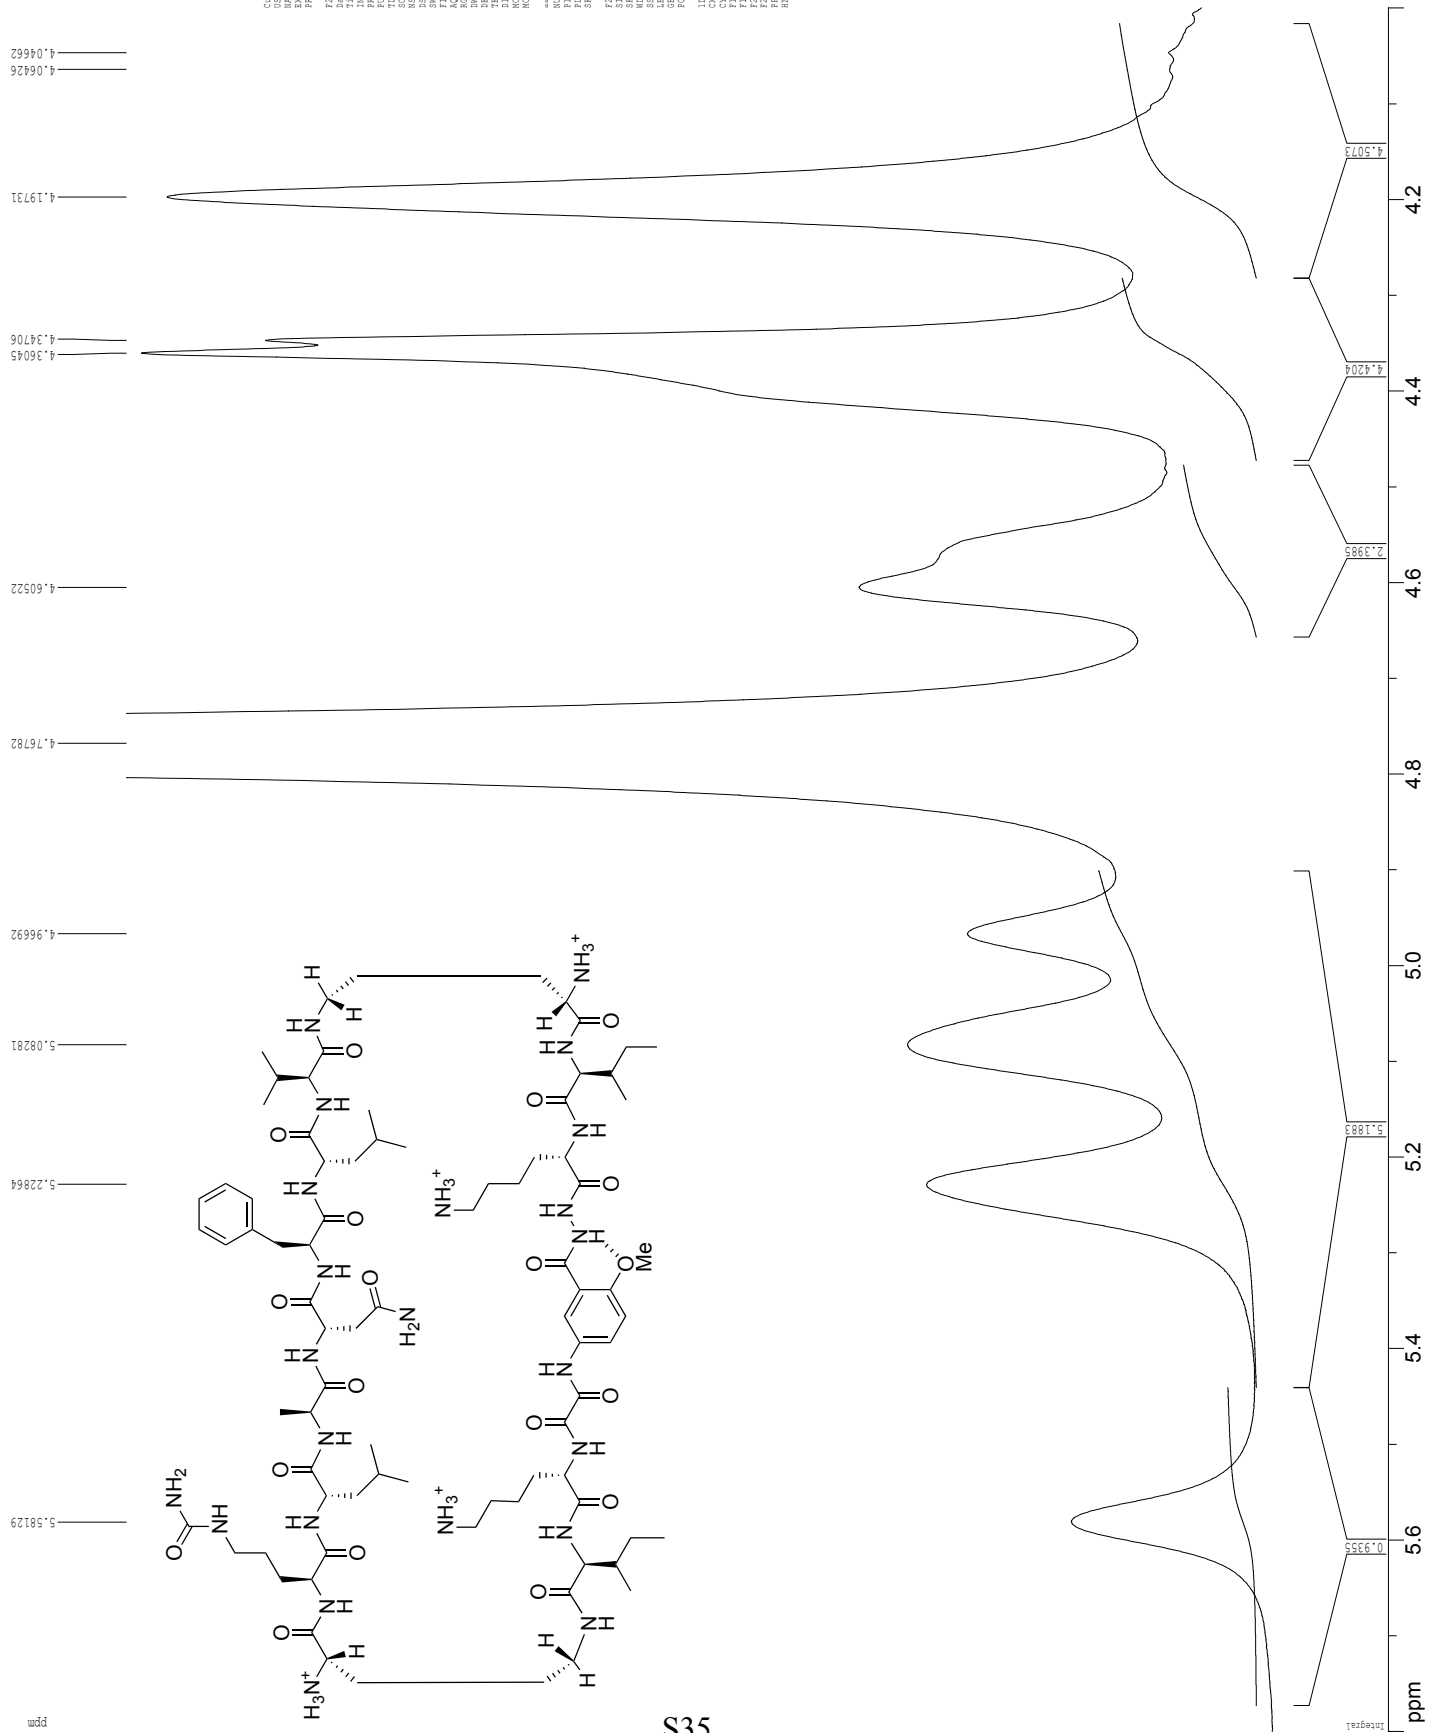

Current Data Parameters  
 USER jfllow  
 EXPNO 1  
 PROCNO 1  
 F2 - Acquisition Parameters  
 Date\_ 20120409  
 Time 11:00:00  
 INSTRUM spect  
 PULPROG zgpg30  
 TD 65536  
 SFO 500.135403 MHz  
 DS 2  
 SWH 6013.2 Hz  
 FWHM 0.198843 Hz  
 AQ 5.4998774 sec  
 RG 62.400 usec  
 DE 6.00 usec  
 DI 0.1000000 sec  
 NUC1 13C  
 CHAN1 F1  
 P1 7.50 usec  
 PL 0.00 dB  
 SFO 500.135403 MHz  
 F2 - Processing parameters  
 SI 65536  
 SF 500.135403 MHz  
 LB 0.30 Hz  
 GB 0  
 PC 4.00  
 LO 100 MHz Parameters  
 CX 22.80 cm  
 CY 3.00 cm  
 CZ 3.00 cm  
 F1 2901.48 Hz  
 F2 2901.48 Hz  
 F3 2901.48 Hz  
 PRCK 0.07895 ppm/cm  
 RECN 39.49116 Hz/cm



**<sup>1</sup>H NMR of macrocyclic β-sheet peptide 1cit, 16 mM in 100 mM deuterioacetate buffer in D<sub>2</sub>O at 500 MHz and 298 K**

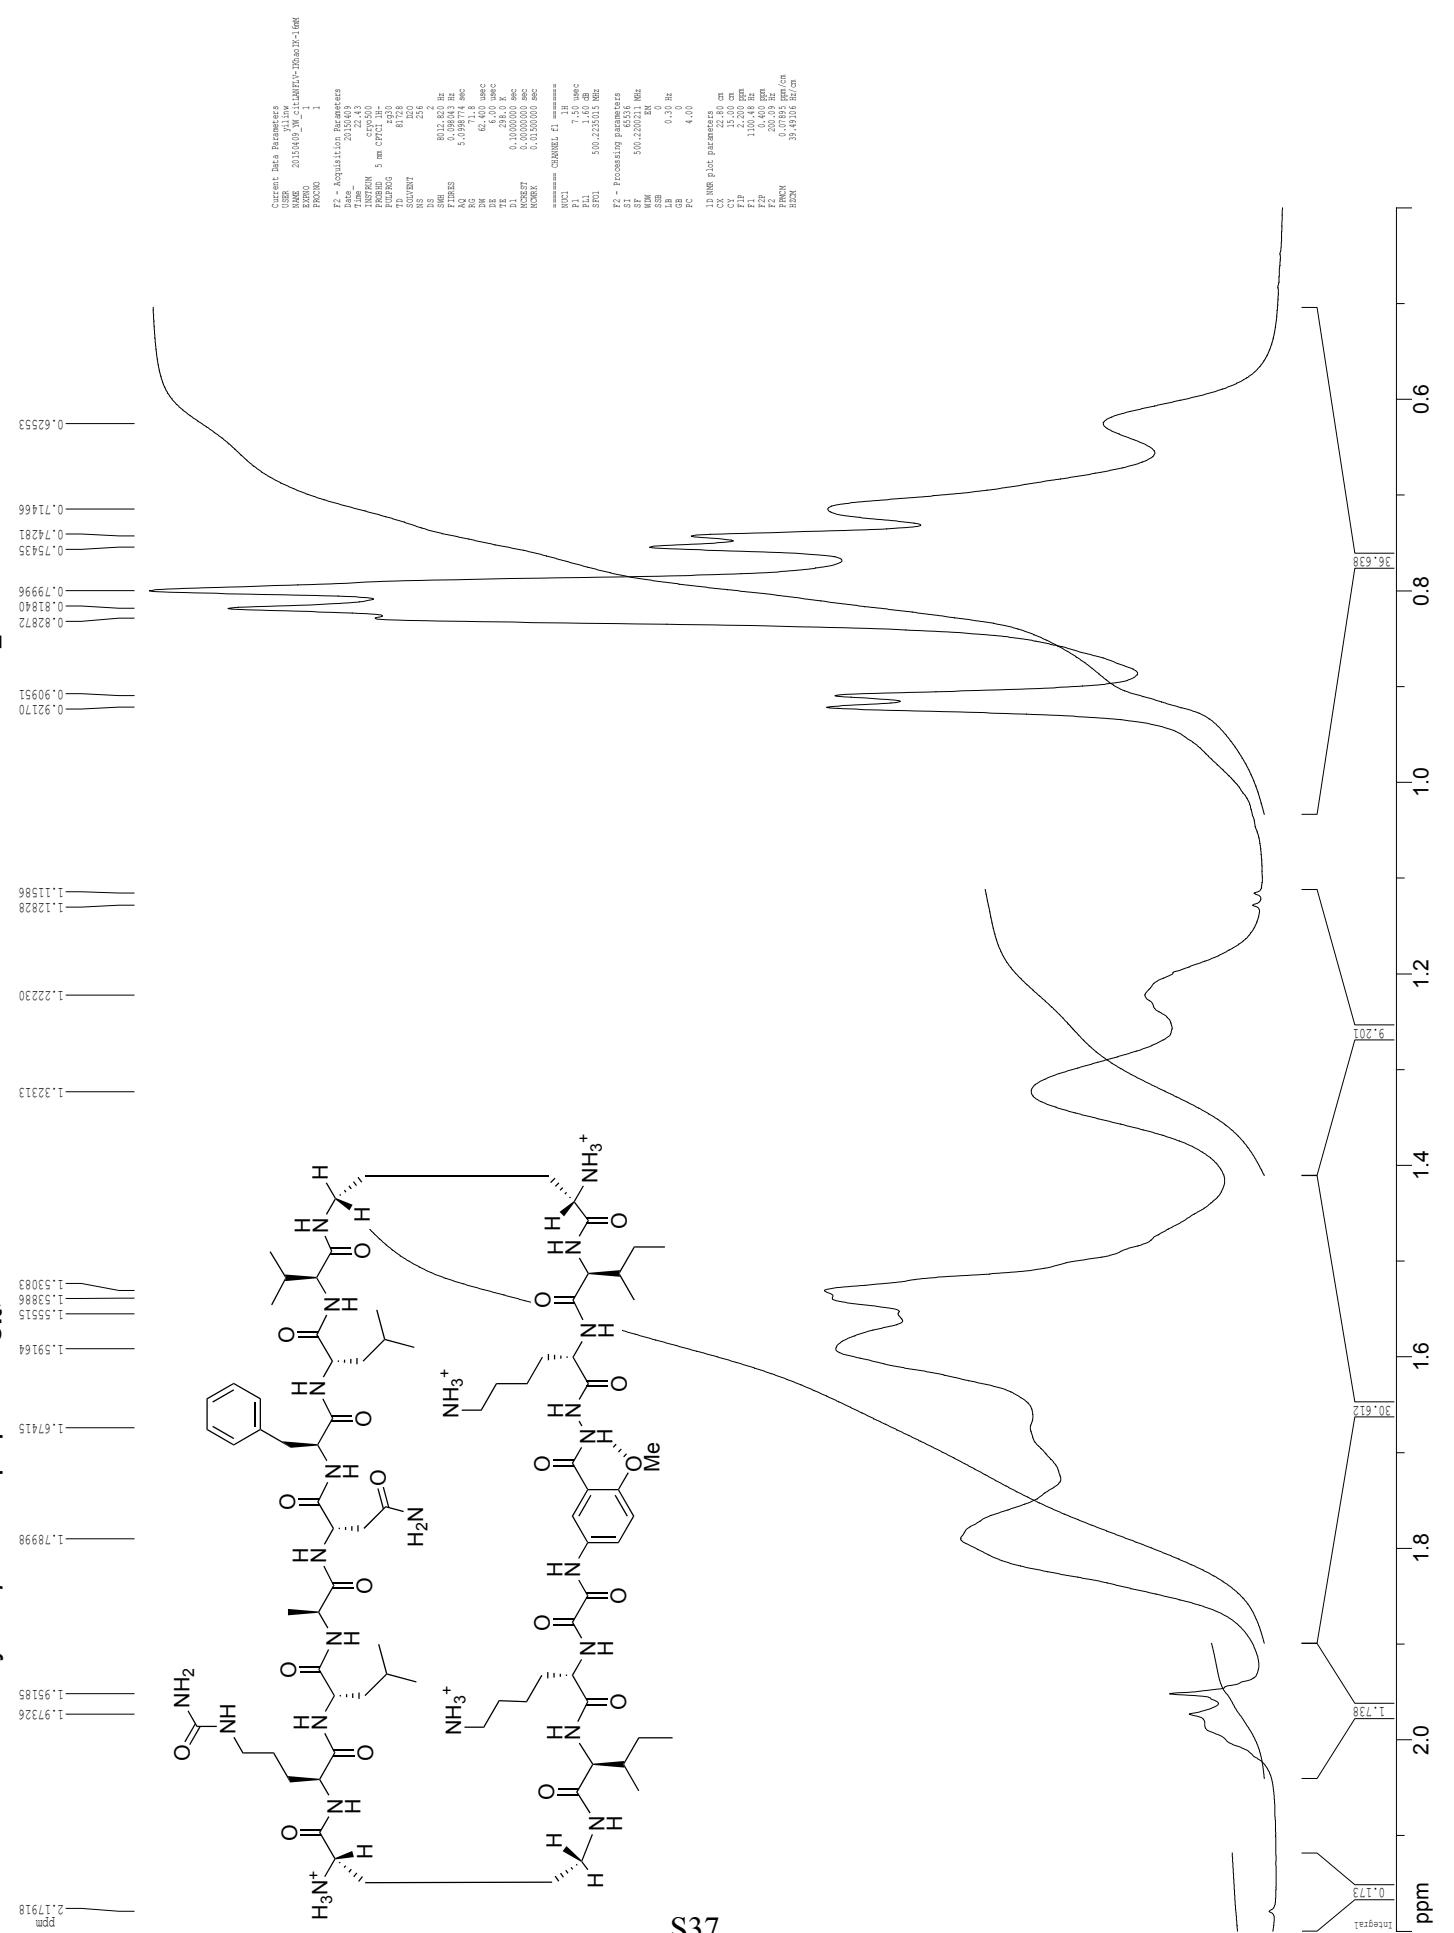

Current Data Parameters  
 USER jllow  
 EXPNO 1  
 PROCNO 1  
 F2 - Acquisition Parameters  
 Date\_ 20150909  
 Time 11:52:00  
 INSTRUM spect  
 PULPROG zgpg30  
 PRGNAME 3 sm CFC1  
 TD 65536  
 ZF 100.626160  
 SFO 500.1362500  
 DS 2  
 SWH 6013.2 Hz  
 FWHZ 0.198843 Hz  
 FIDRES 5.4998774 sec  
 AQ 62.400 usec  
 RG 62.400 usec  
 DE 6.00 usec  
 TE 300.2 K  
 D1 0.10000000 sec  
 NOBS27 0.00000000 sec  
 NUSE27 0.00000000 sec  
 PARAMS 0.00000000 sec  
 ===== CHANNEL f1 =====  
 NUC1 13C  
 P1 7.50 usec  
 PL1 0.00 dB  
 SFO1 500.1362500 MHz  
 ===== Processing parameters =====  
 SI 65536  
 SF 500.136250011 MHz  
 LB 0  
 SB 0  
 GB 0  
 PC 4.00  
 LO 100 MHz Parameters  
 CX 22.80 cm  
 CY 2.00 cm  
 CZ 2.00 cm  
 F1 1100.48 MHz  
 F2 1100.48 MHz  
 F3 1100.48 MHz  
 PRCK 0.07895 ppm/cm  
 RECN 39.49116 Hz/cm

<sup>1</sup>H NMR 2D TOCSY of macrocyclic β-sheet peptide **1**<sub>Cit</sub> with 150-ms spin-lock mixing time  
16 mM in 100 mM deuterioacetate buffer in D<sub>2</sub>O at 500 MHz and 298 K

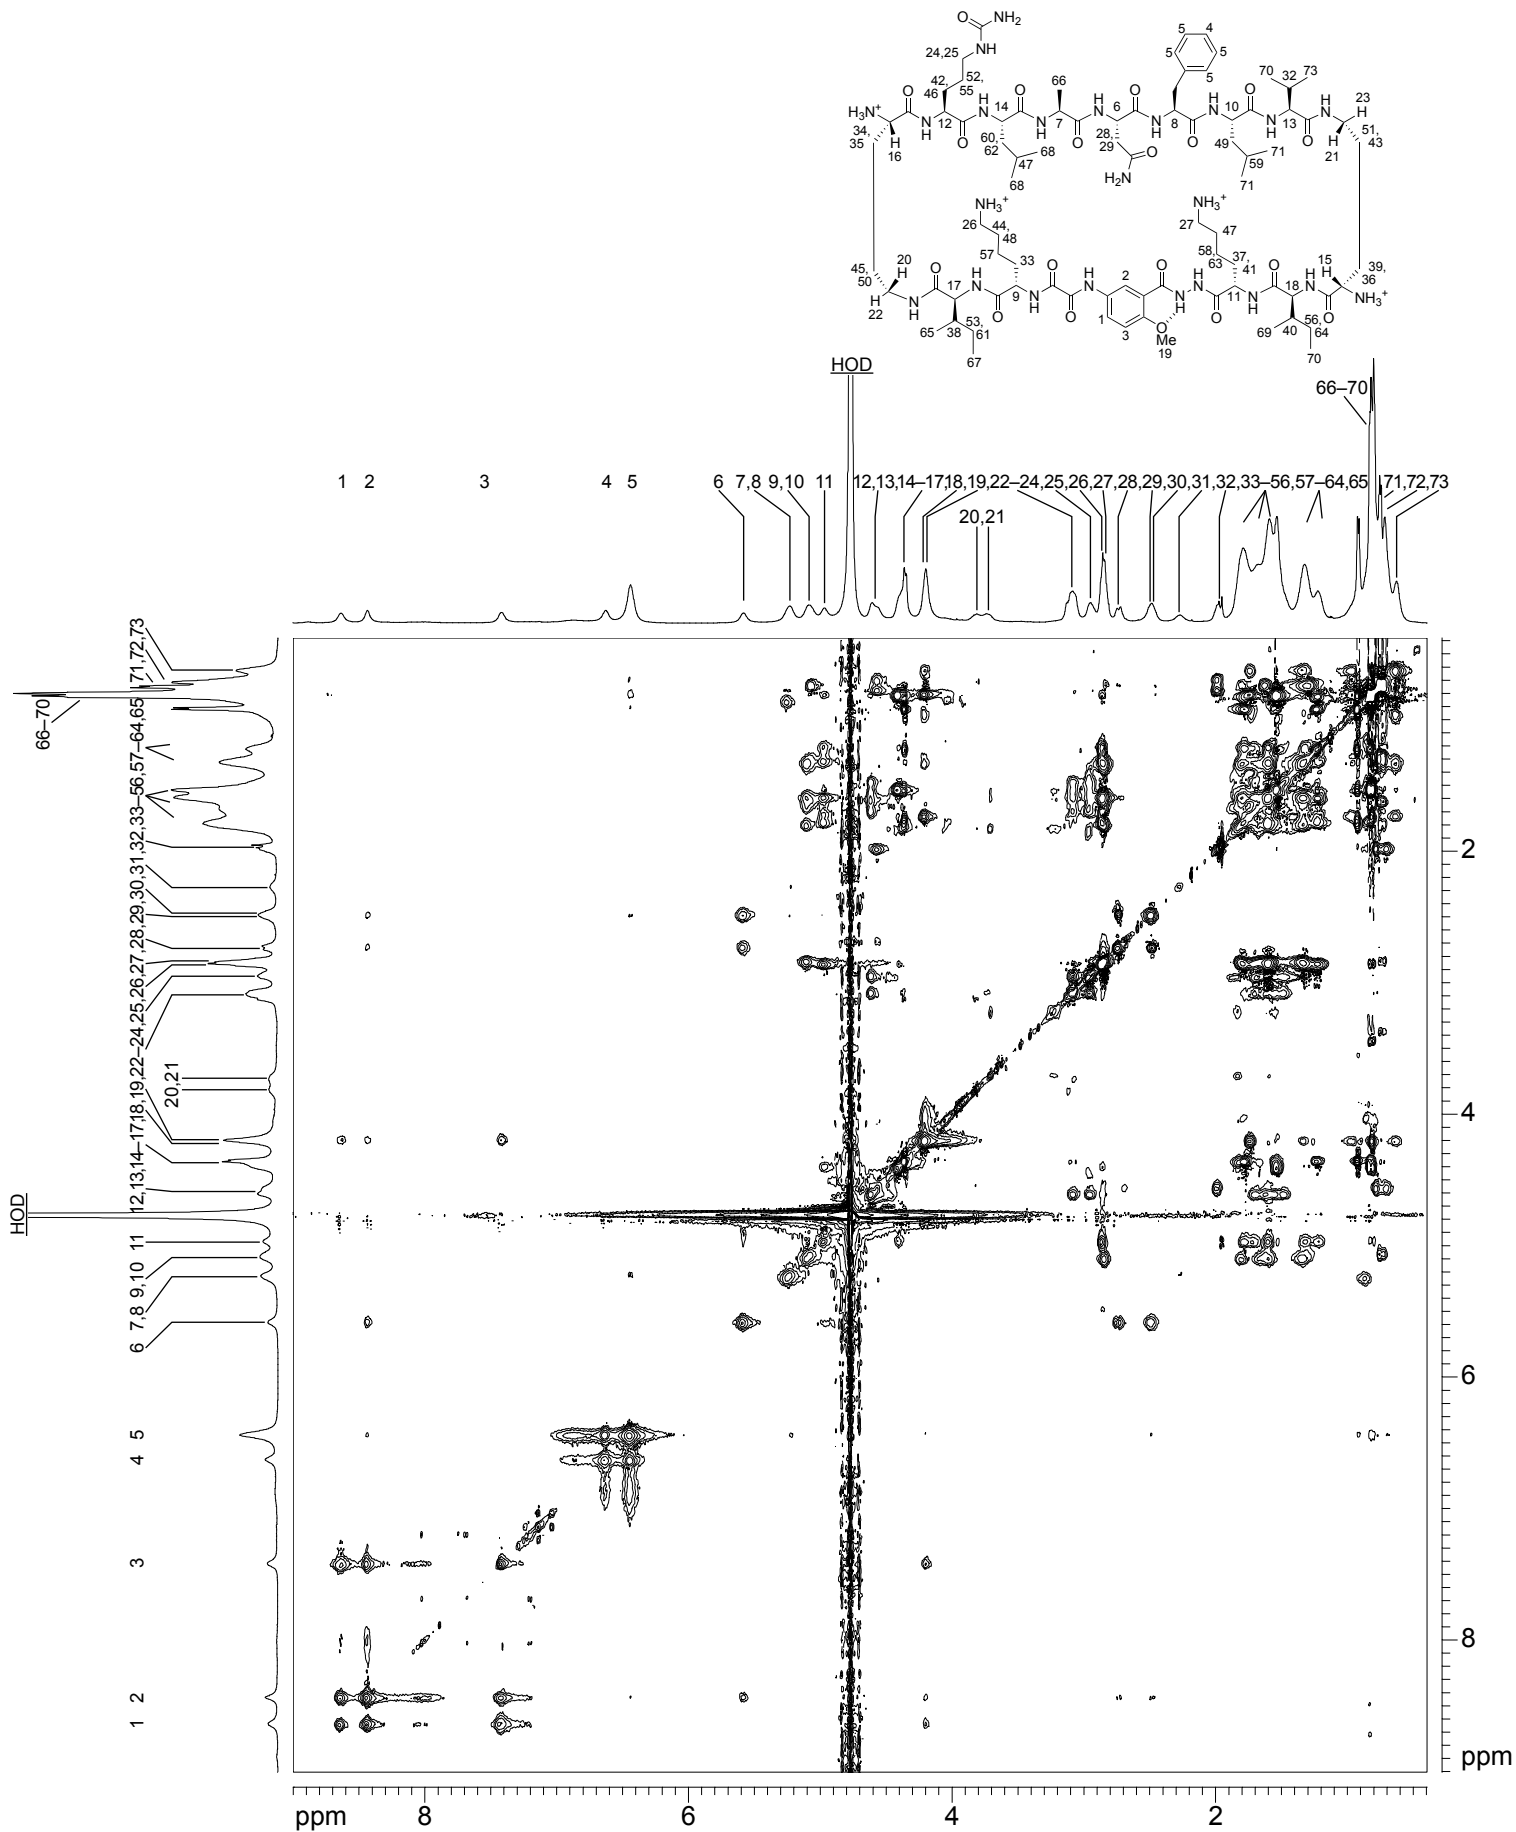

<sup>1</sup>H NMR 2D TOCSY of macrocyclic β-sheet peptide **1C<sub>it</sub>** with 150-ms spin-lock mixing time  
16 mM in 100 mM deuterioacetate buffer in D<sub>2</sub>O at 500 MHz and 298 K

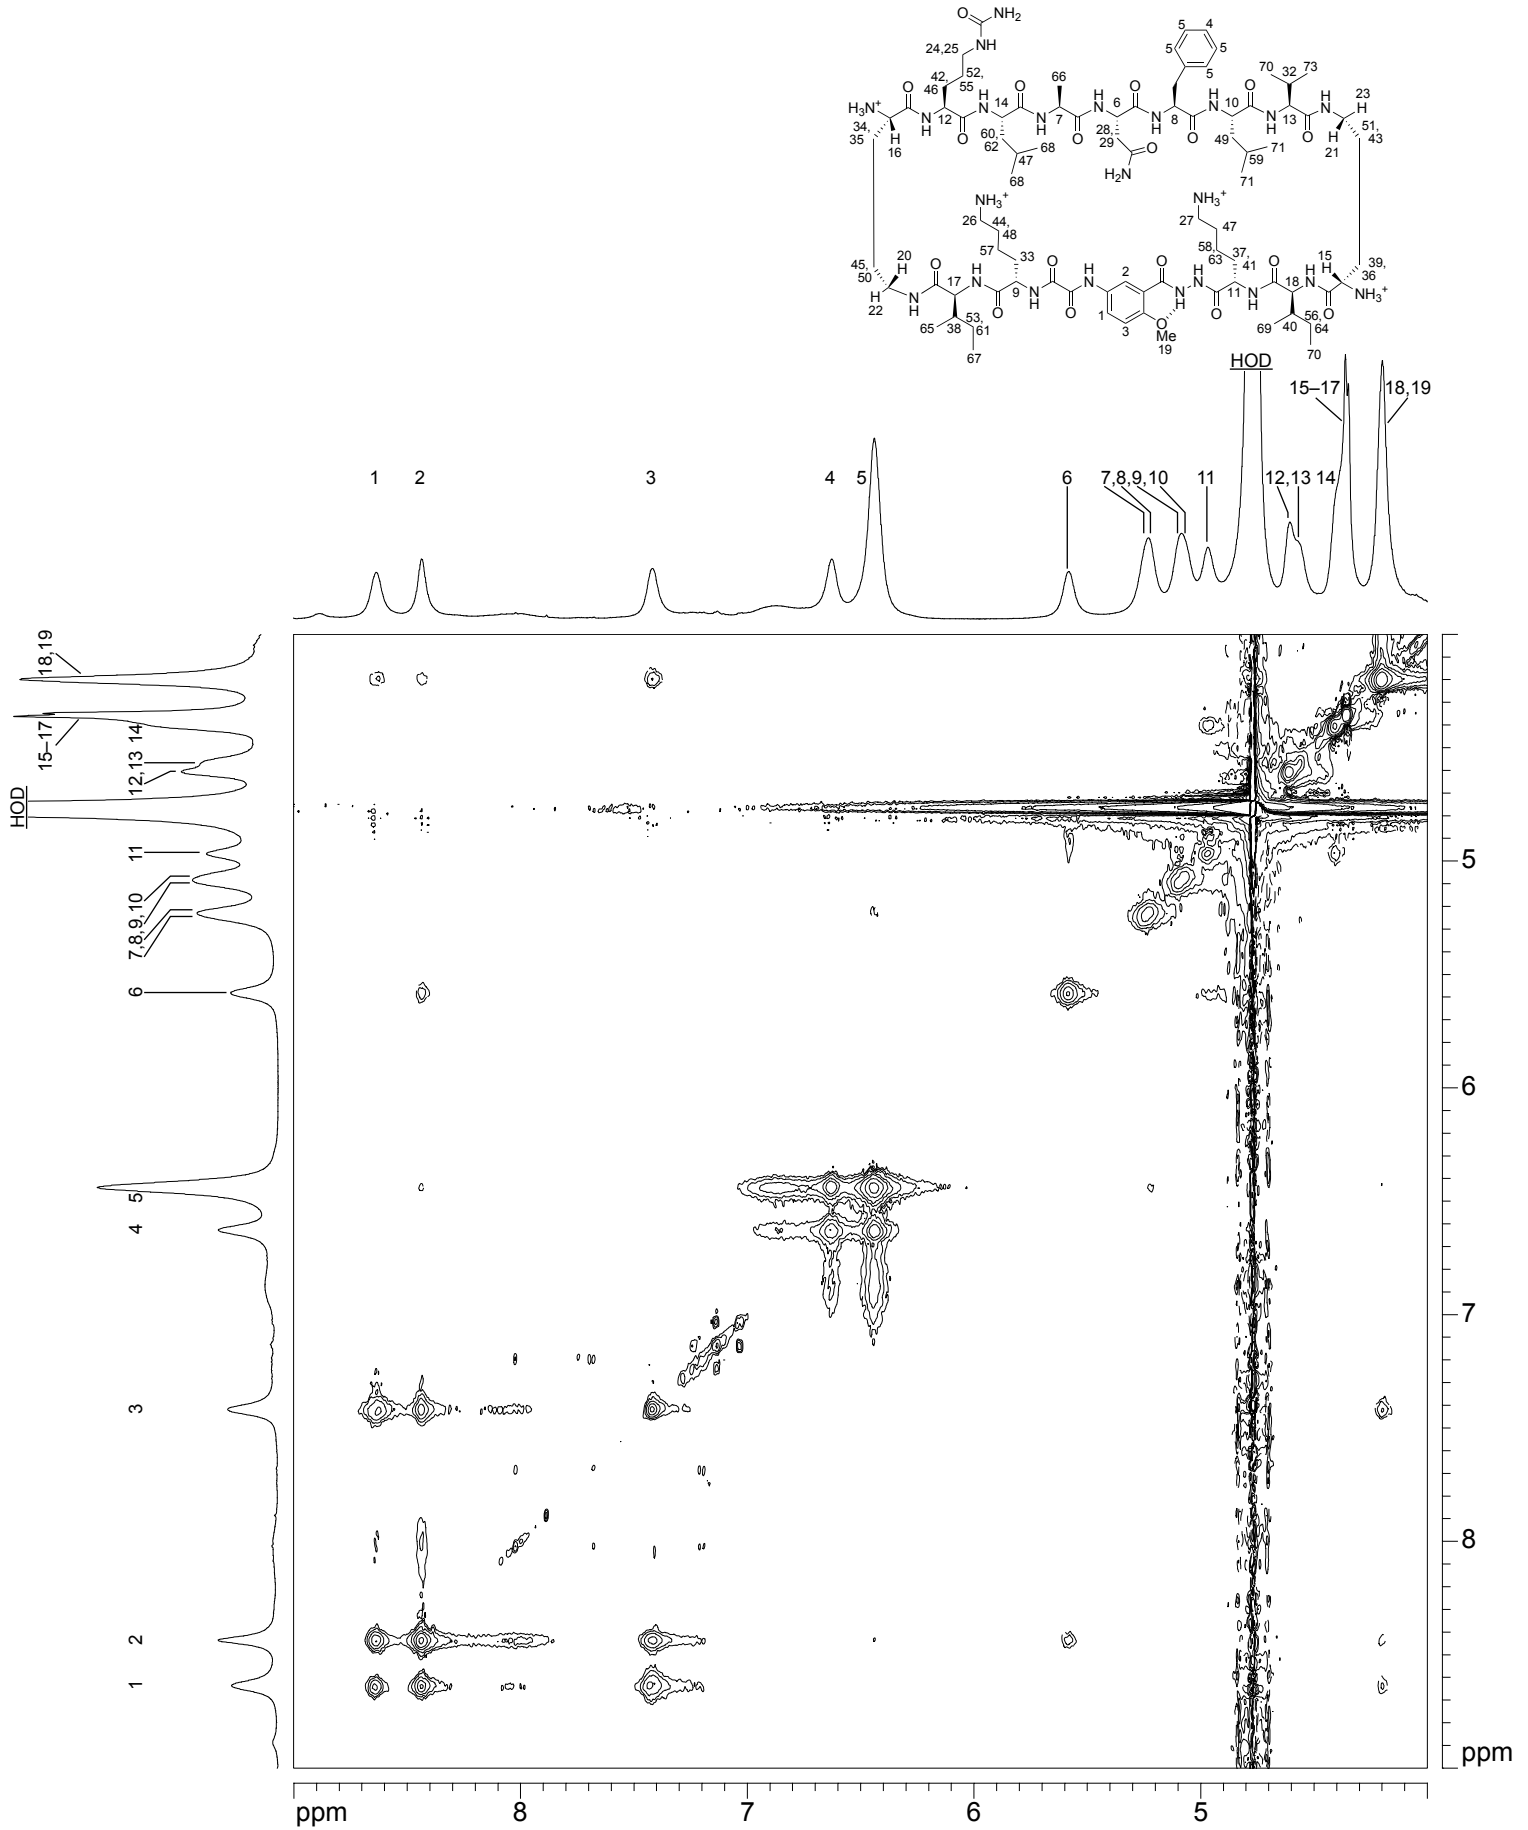

<sup>1</sup>H NMR 2D TOCSY of macrocyclic β-sheet peptide **1C<sub>it</sub>** with 150-ms spin-lock mixing time  
16 mM in 100 mM deuterioacetate buffer in D<sub>2</sub>O at 500 MHz and 298 K

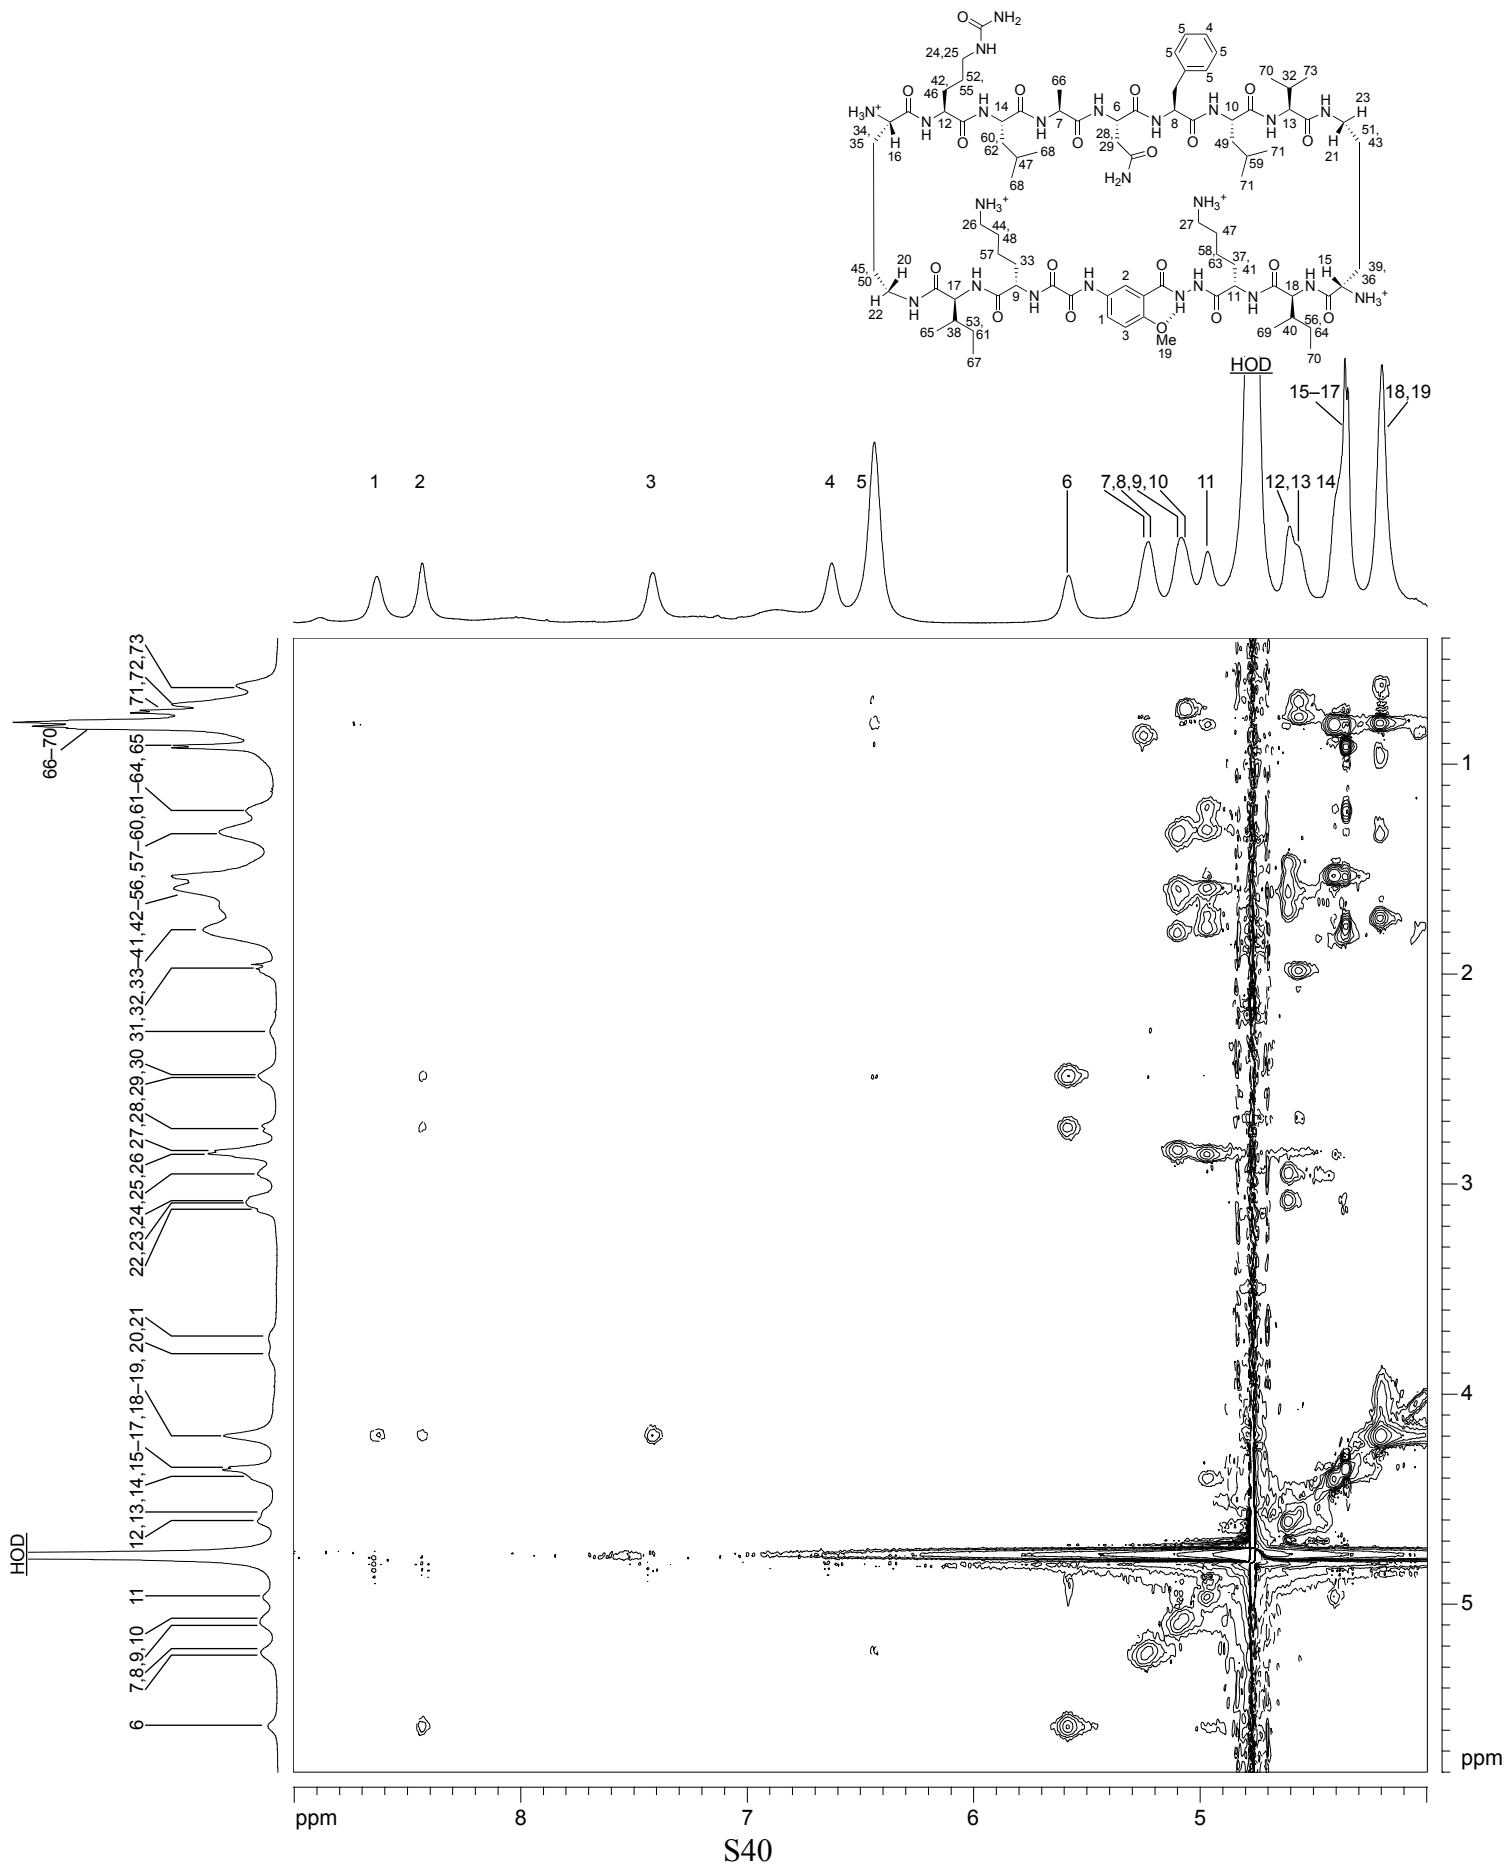

<sup>1</sup>H NMR 2D TOCSY of macrocyclic β-sheet peptide **1cit**  
16 mM in D<sub>2</sub>O at 500 MHz and 298 K with 150-ms spin-lock mixing time

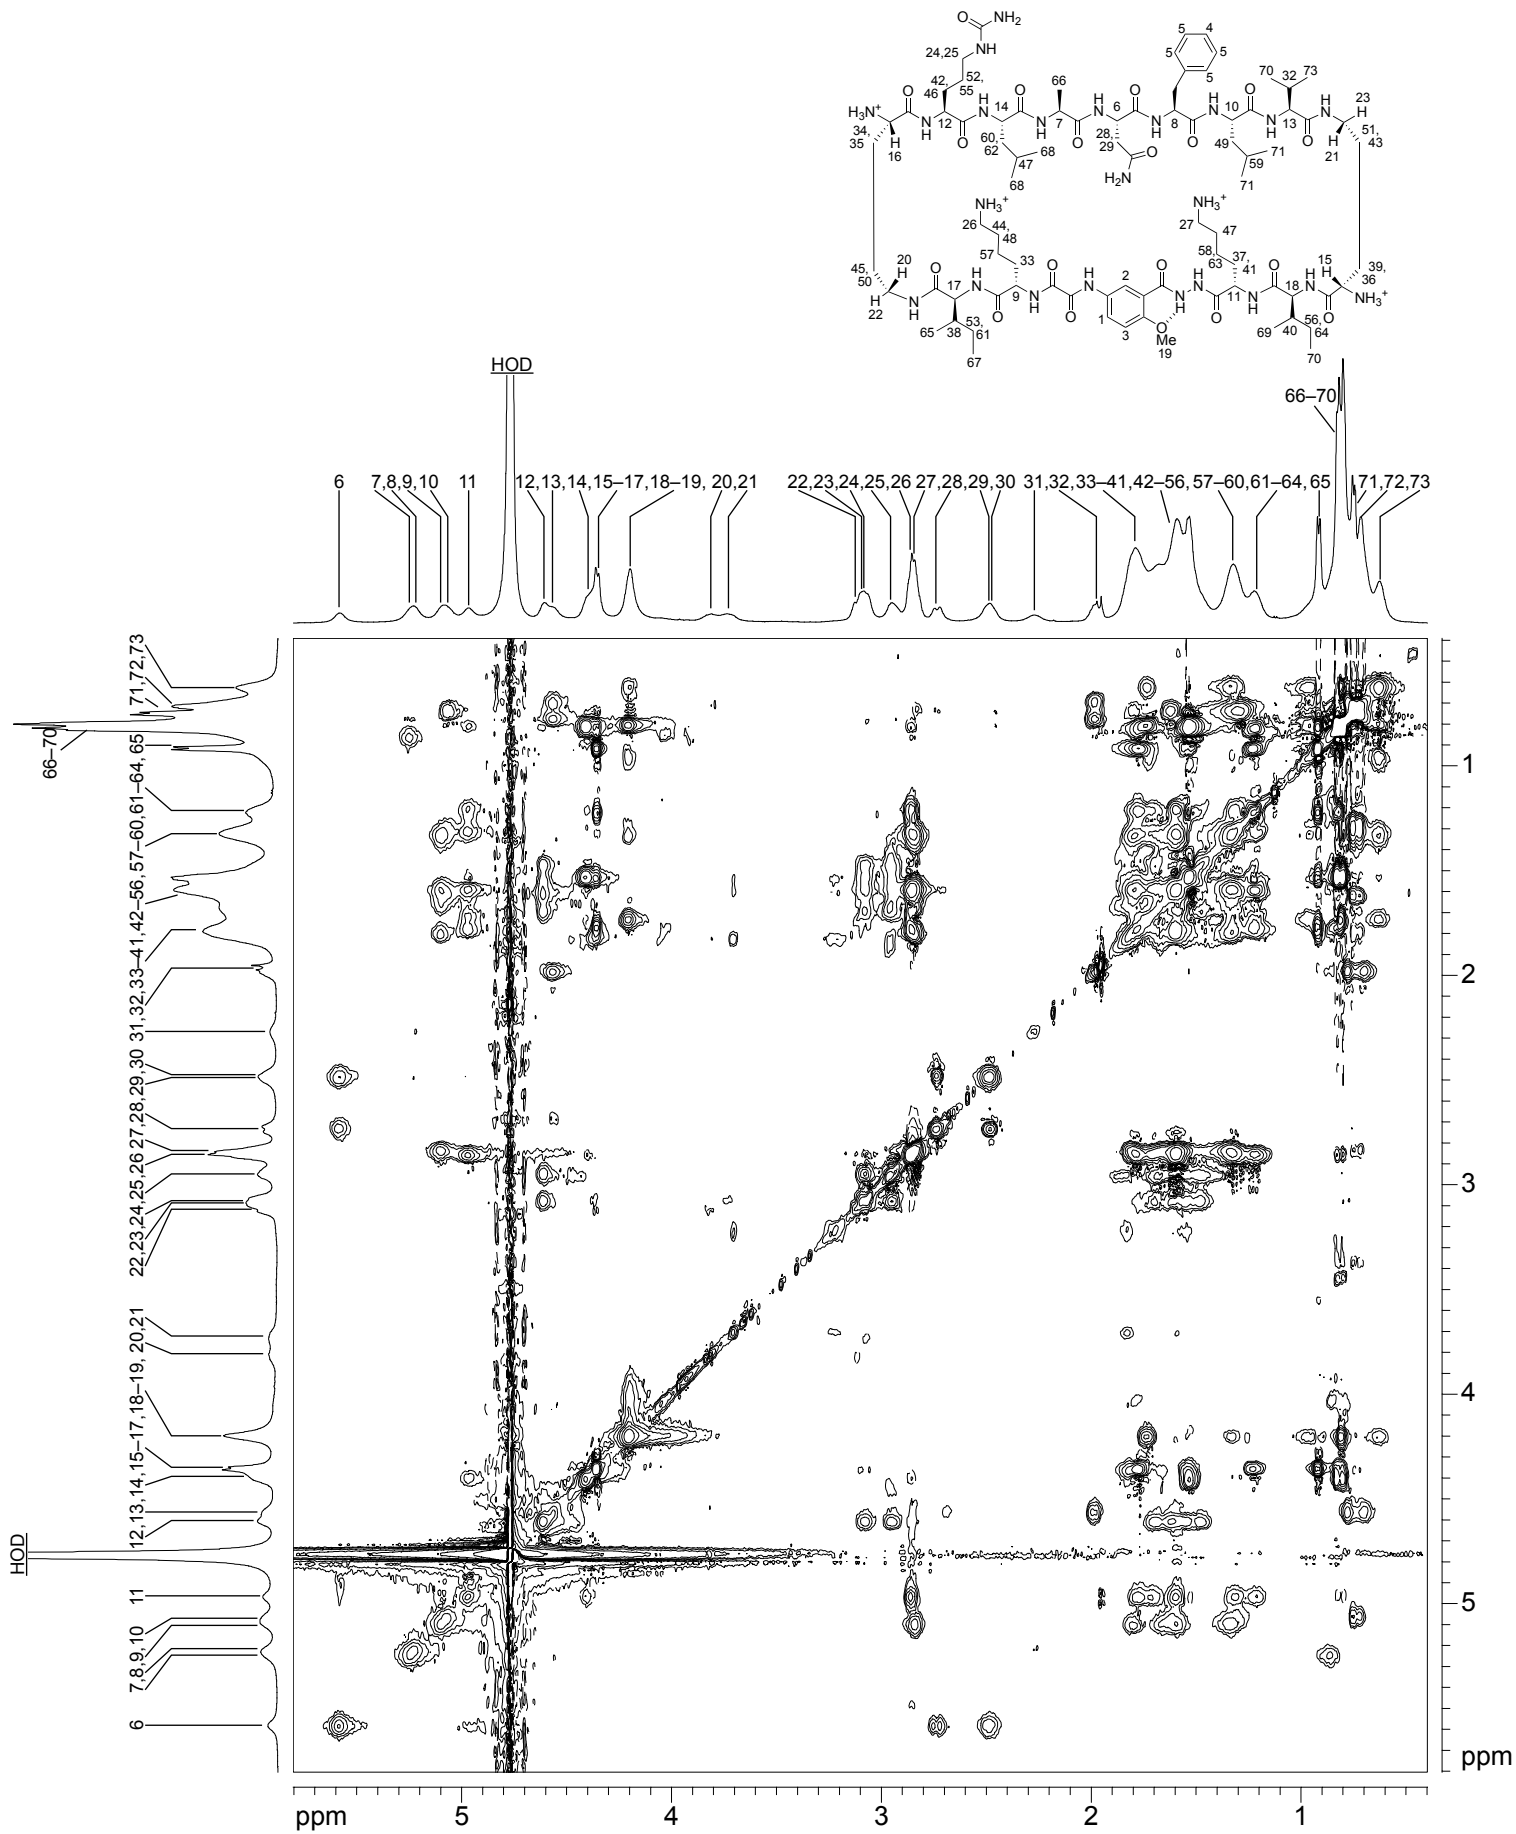

<sup>1</sup>H NMR 2D NOESY of macrocyclic β-sheet peptide **1**<sub>Cit</sub> with 150-ms mixing time  
16 mM in 100 mM deuterioacetate buffer in D<sub>2</sub>O at 500 MHz and 298 K

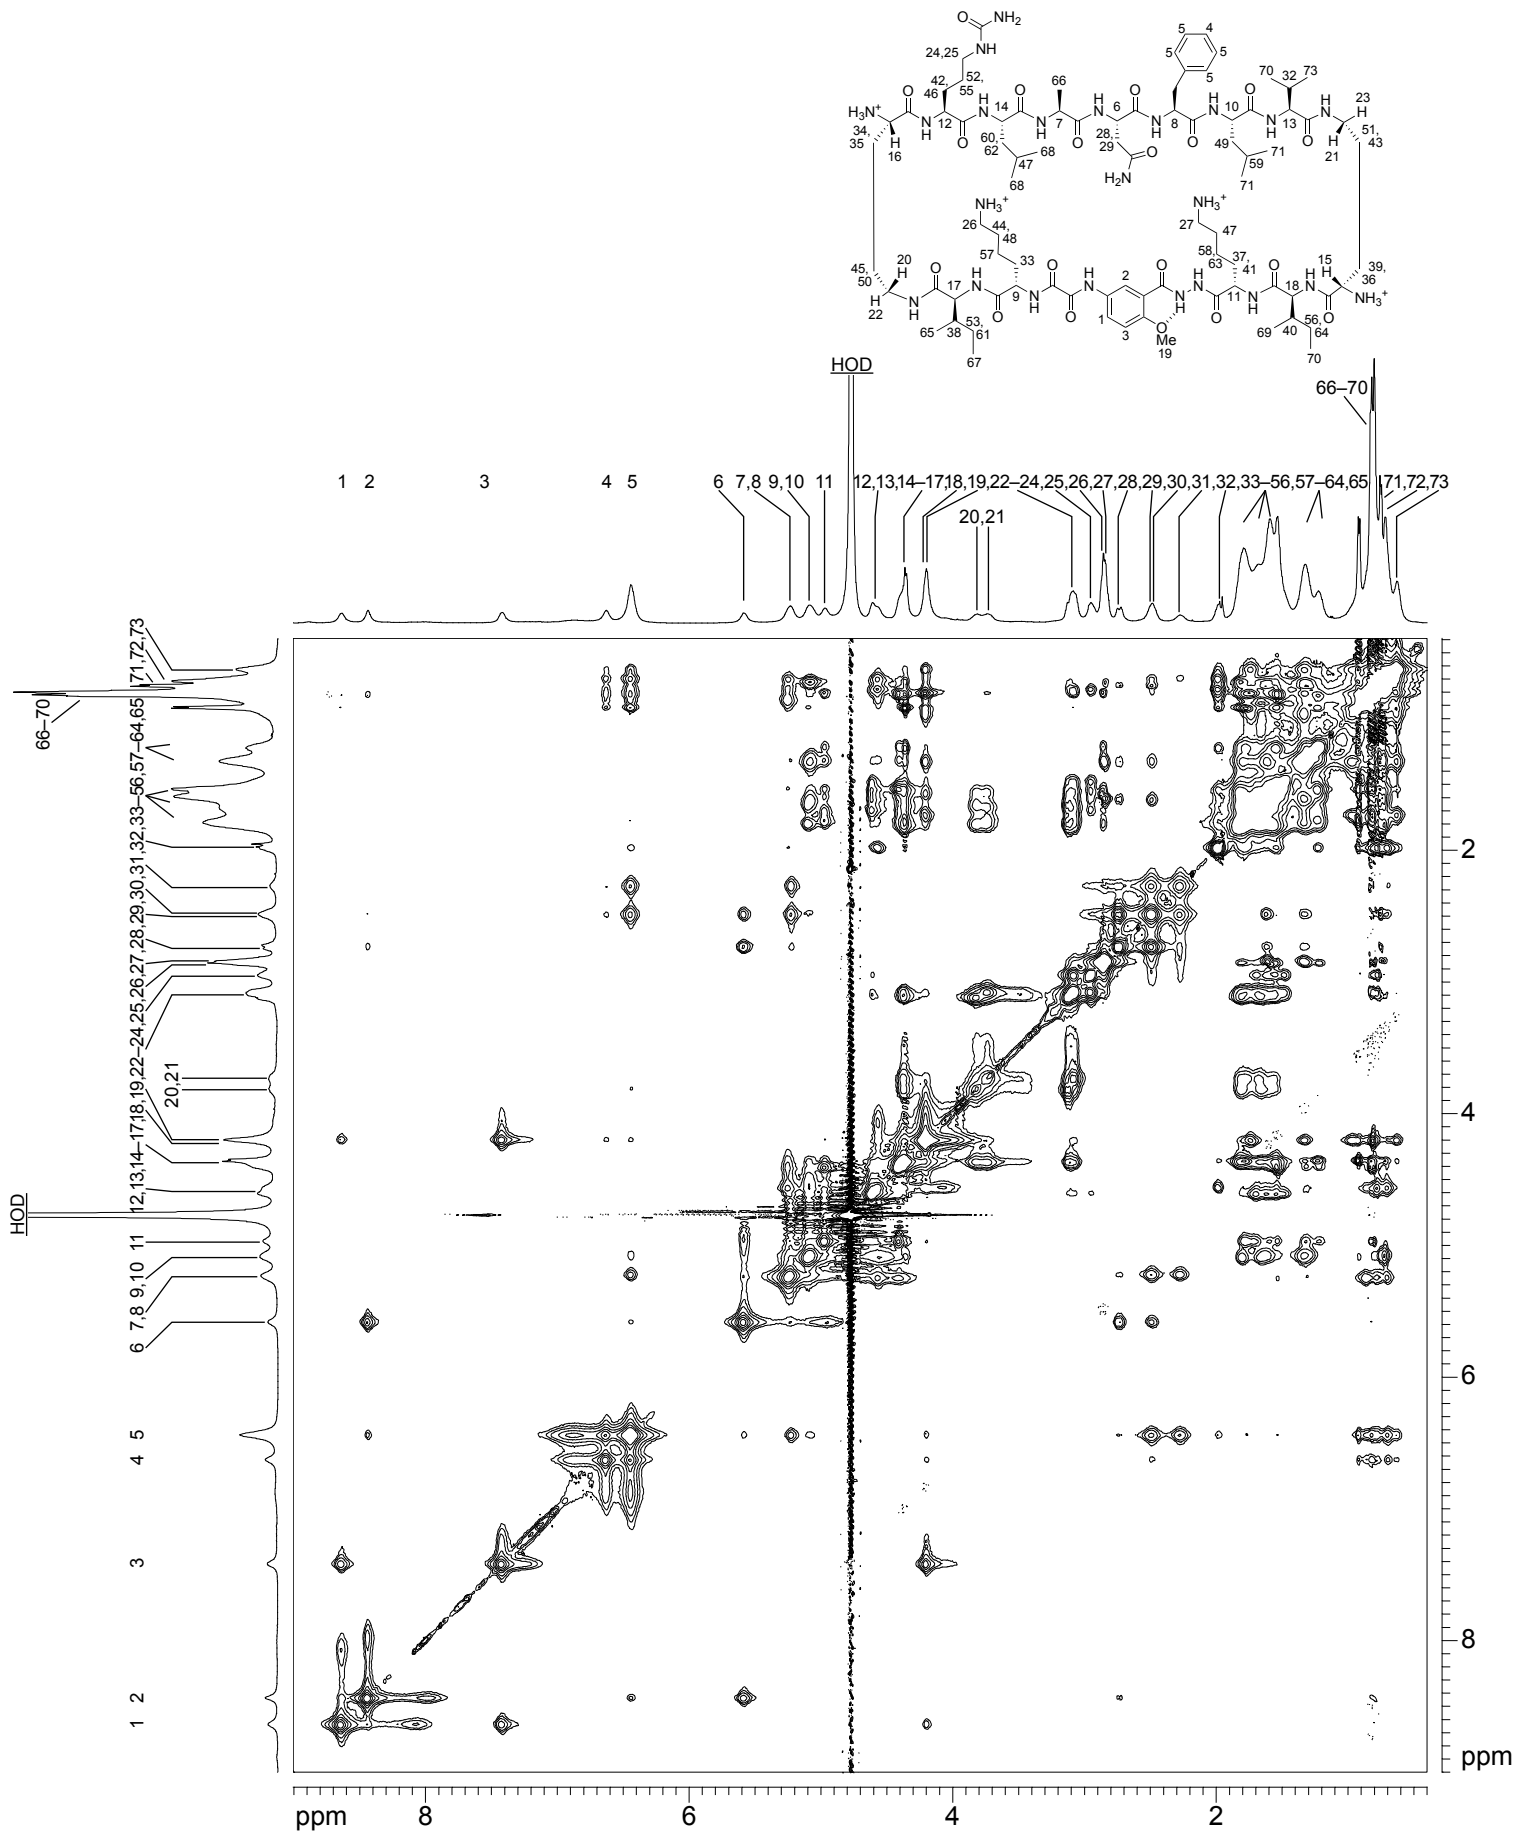



<sup>1</sup>H NMR 2D NOESY of macrocyclic β-sheet peptide **1**<sub>Cit</sub> with 150-ms mixing time  
16 mM in 100 mM deuterioacetate buffer in D<sub>2</sub>O at 500 MHz and 298 K

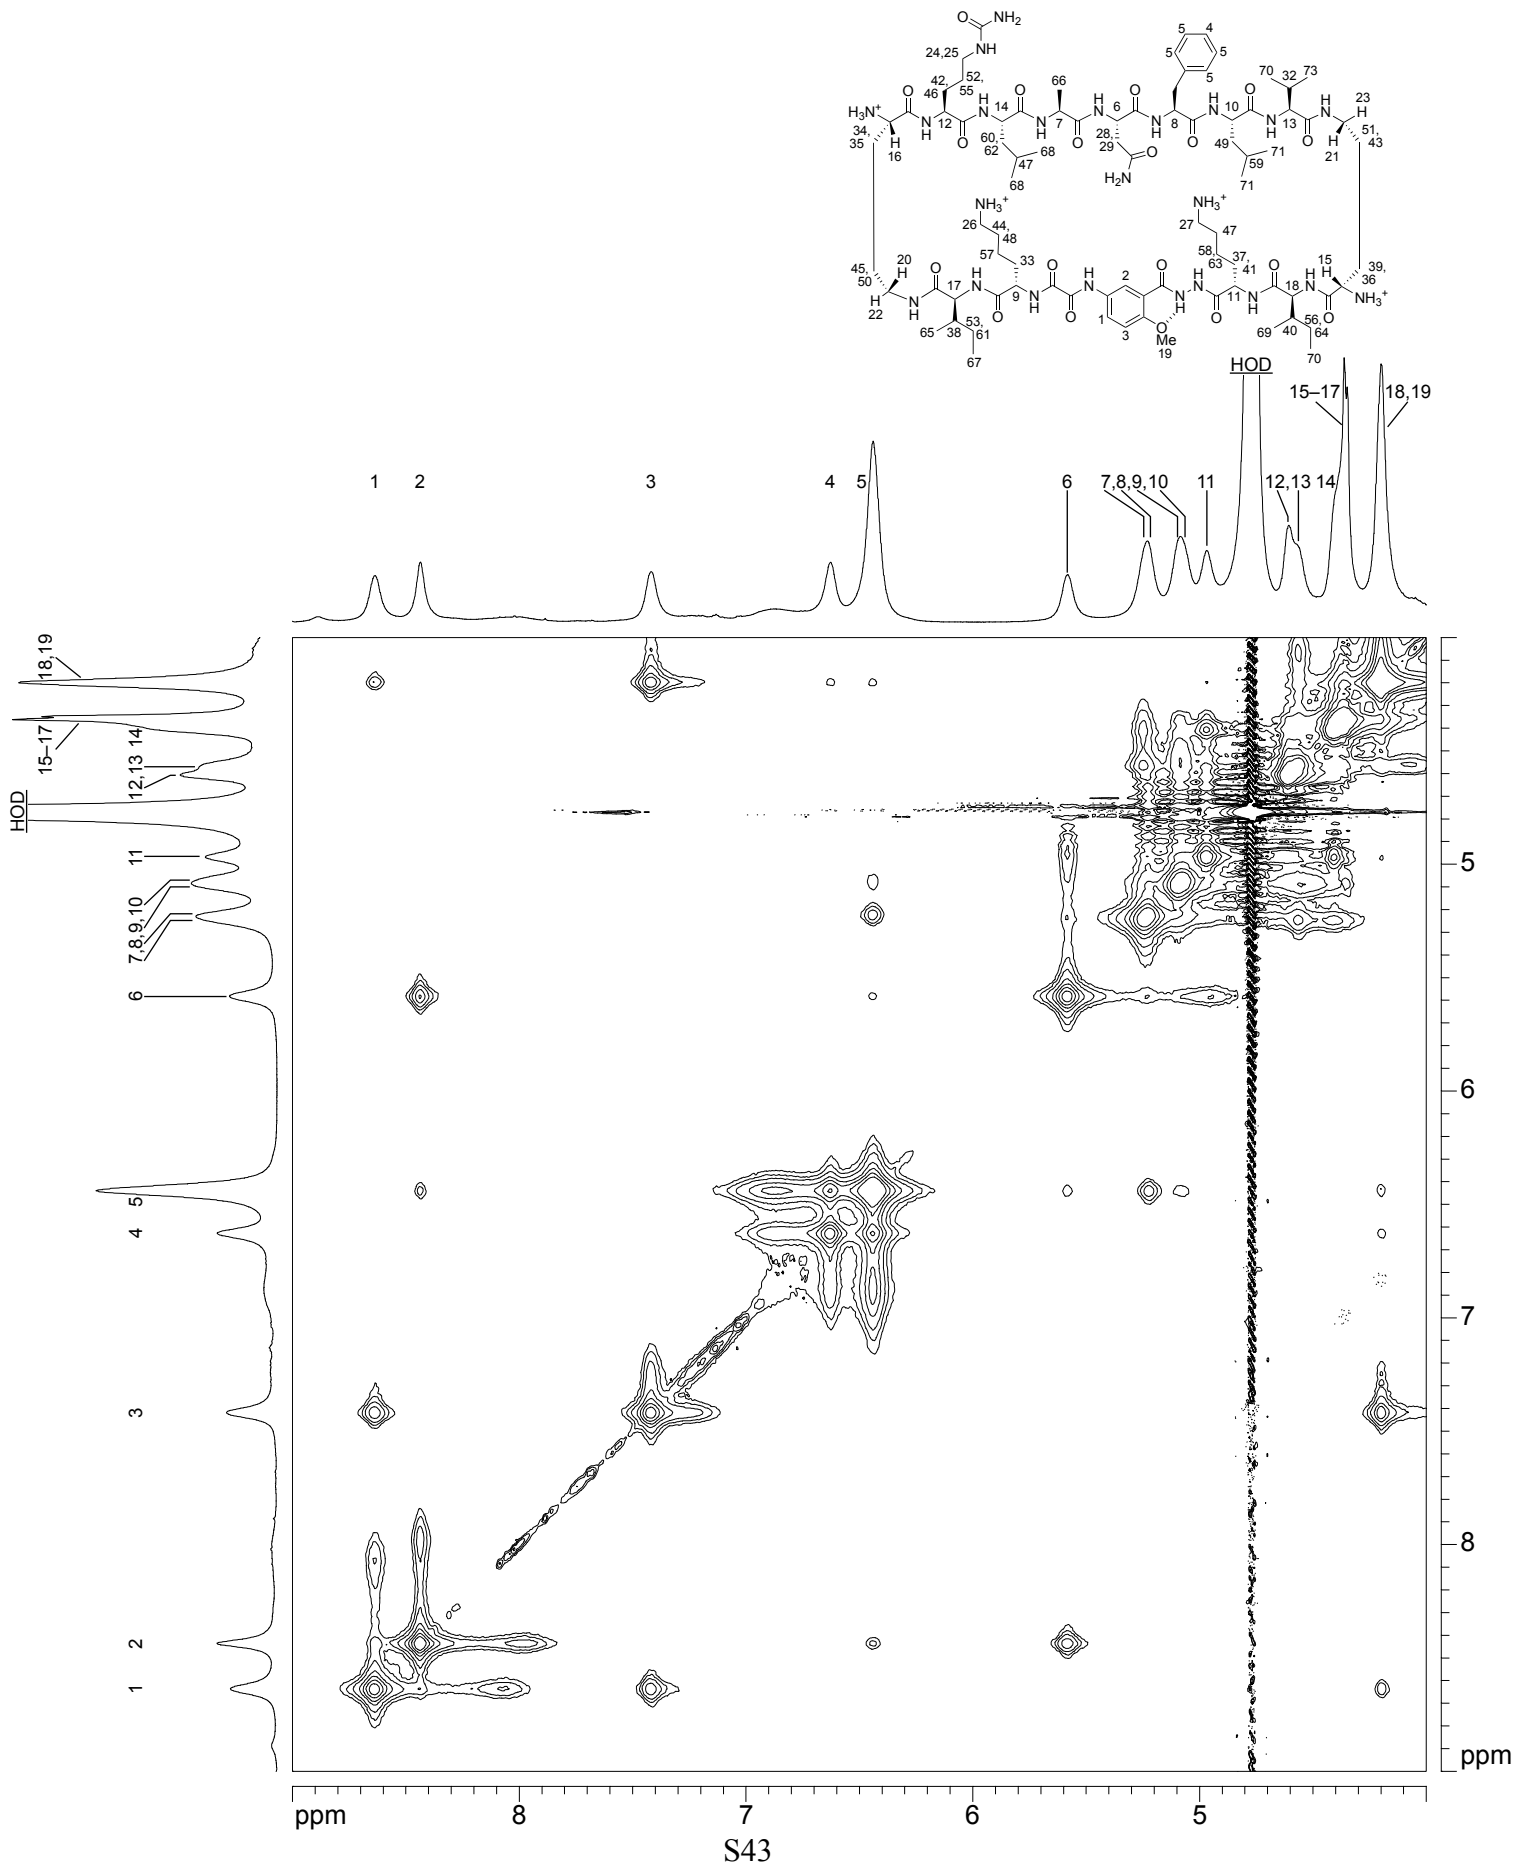

<sup>1</sup>H NMR 2D NOESY of macrocyclic β-sheet peptide **1**<sub>Cit</sub> with 150-ms mixing time  
16 mM in 100 mM deuterioacetate buffer in D<sub>2</sub>O at 500 MHz and 298 K

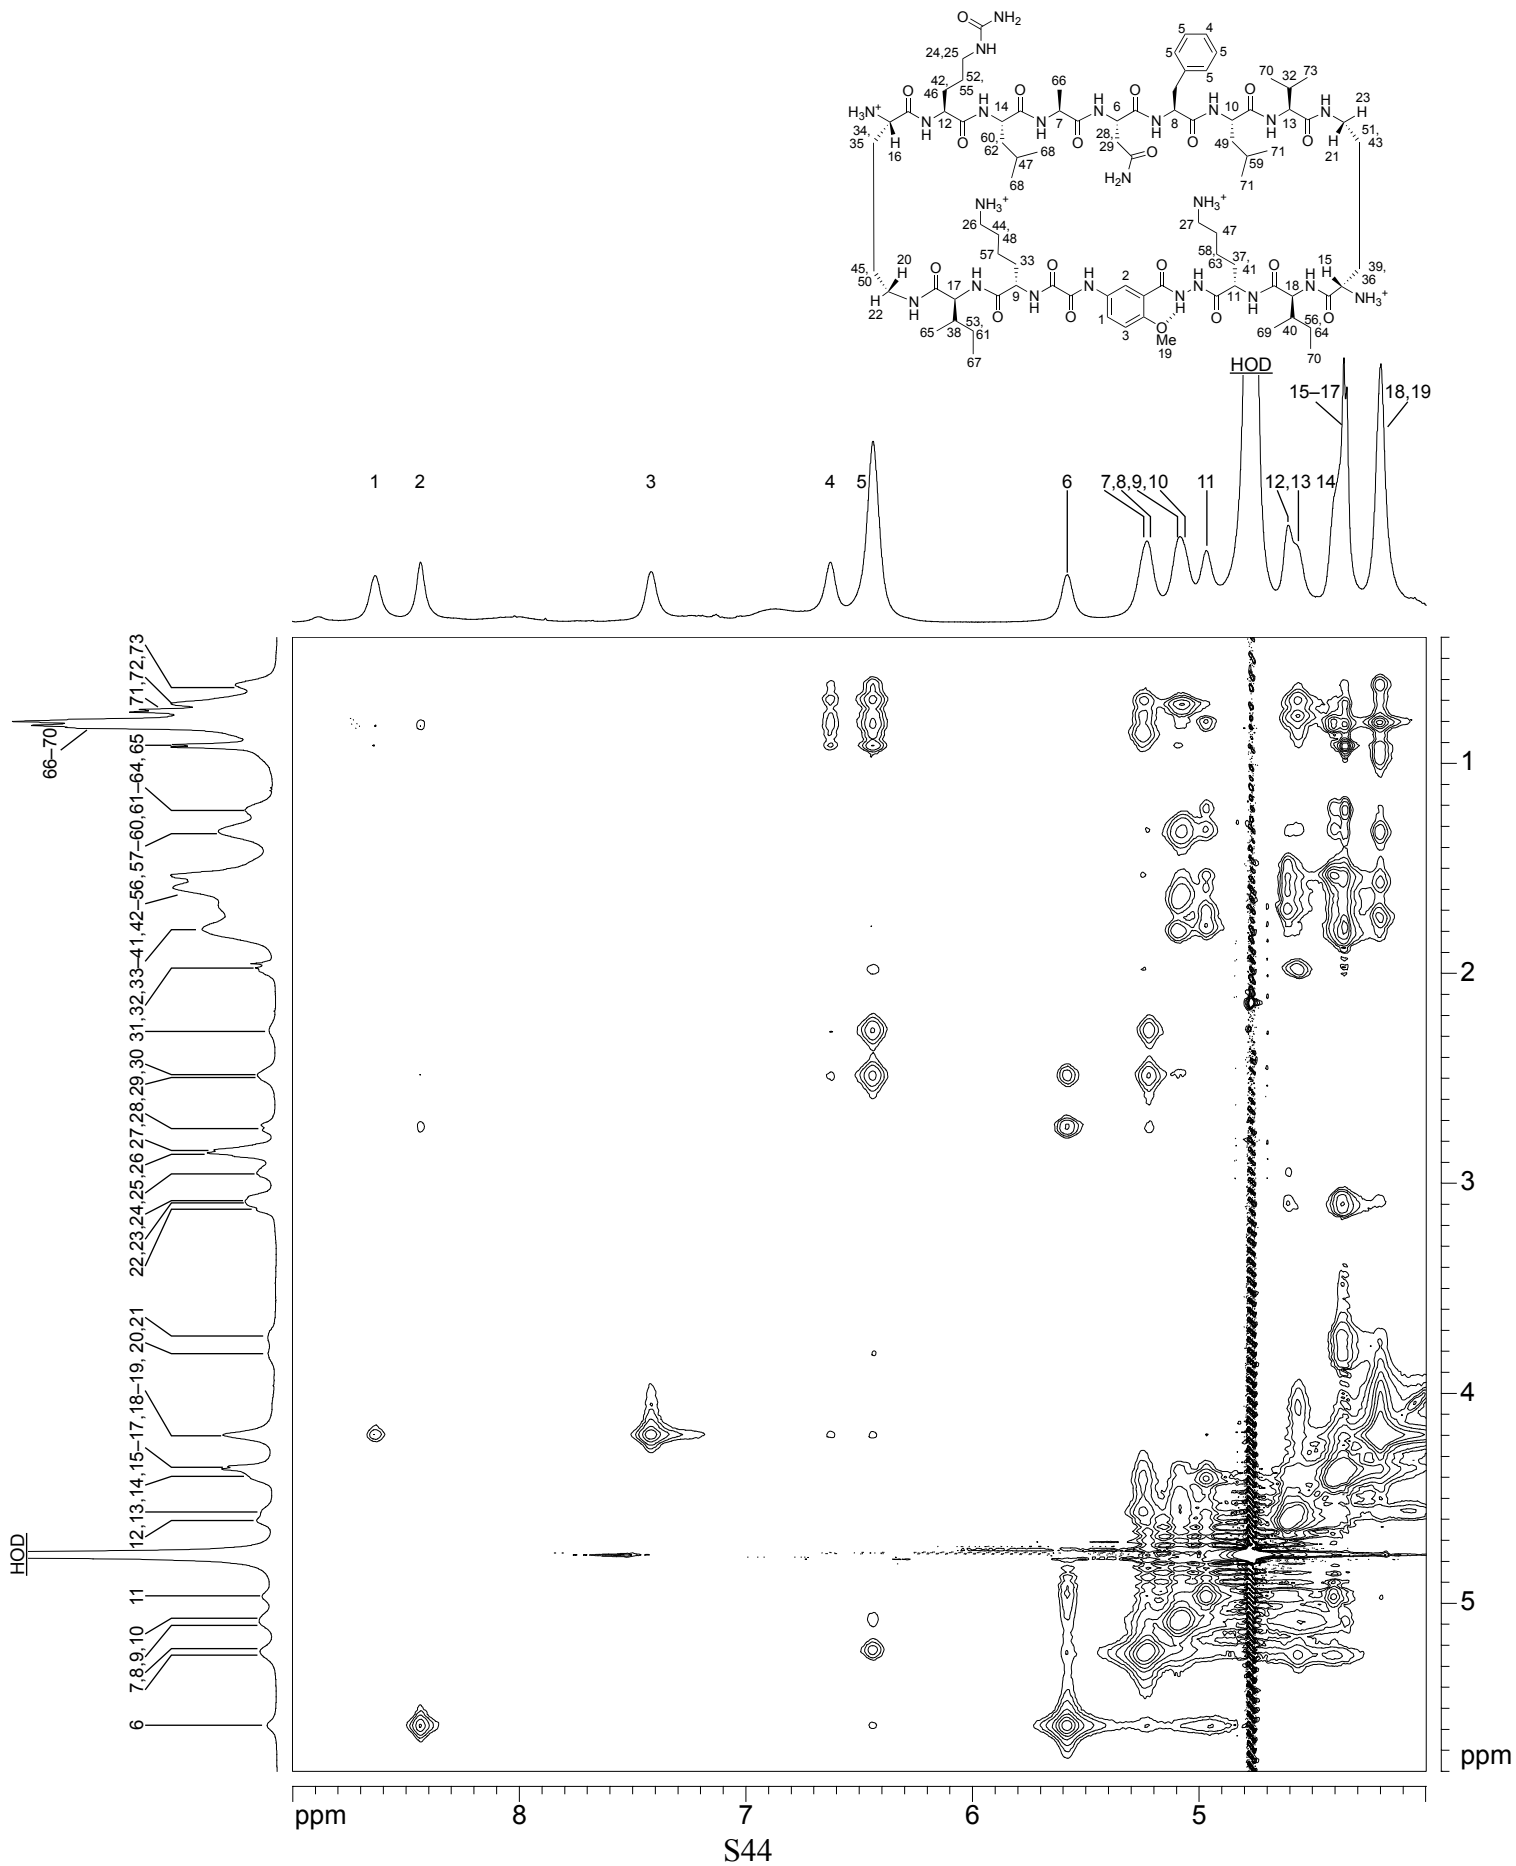

<sup>1</sup>H NMR 2D NOESY of macrocyclic β-sheet peptide **1C<sub>it</sub>** with 150-ms mixing time  
16 mM in 100 mM deuterioacetate buffer in D<sub>2</sub>O at 500 MHz and 298 K

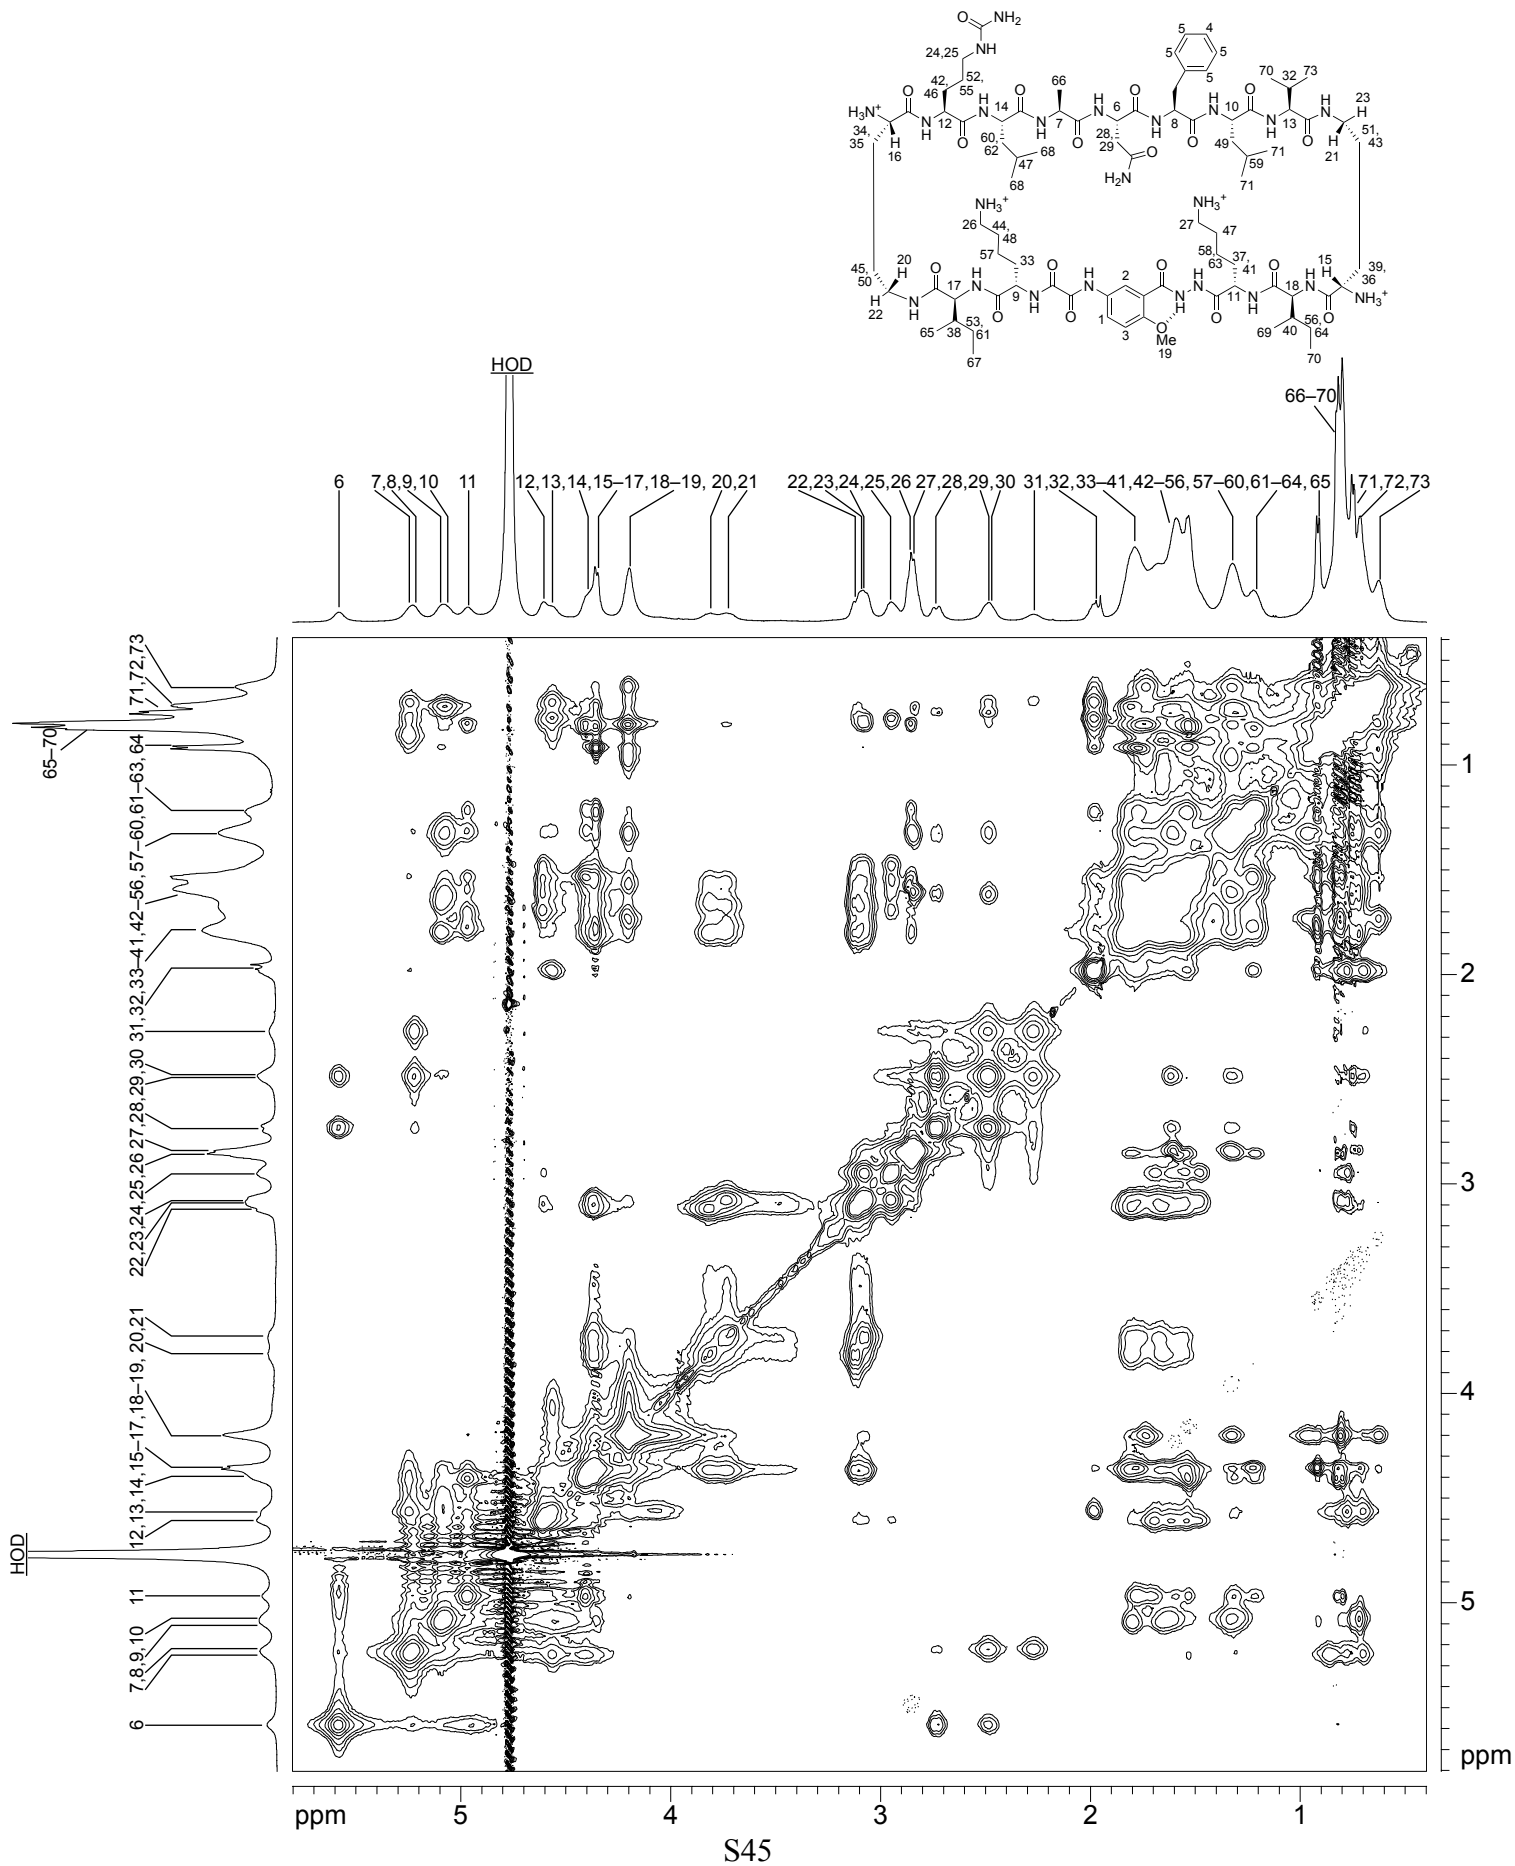

$^1\text{H}$  NMR DOSY of macrocyclic  $\beta$ -sheet peptide **1Cit** at 500 MHz and 298 K  
1 mM in 100 mM deuterioacetate buffer in  $\text{D}_2\text{O}$

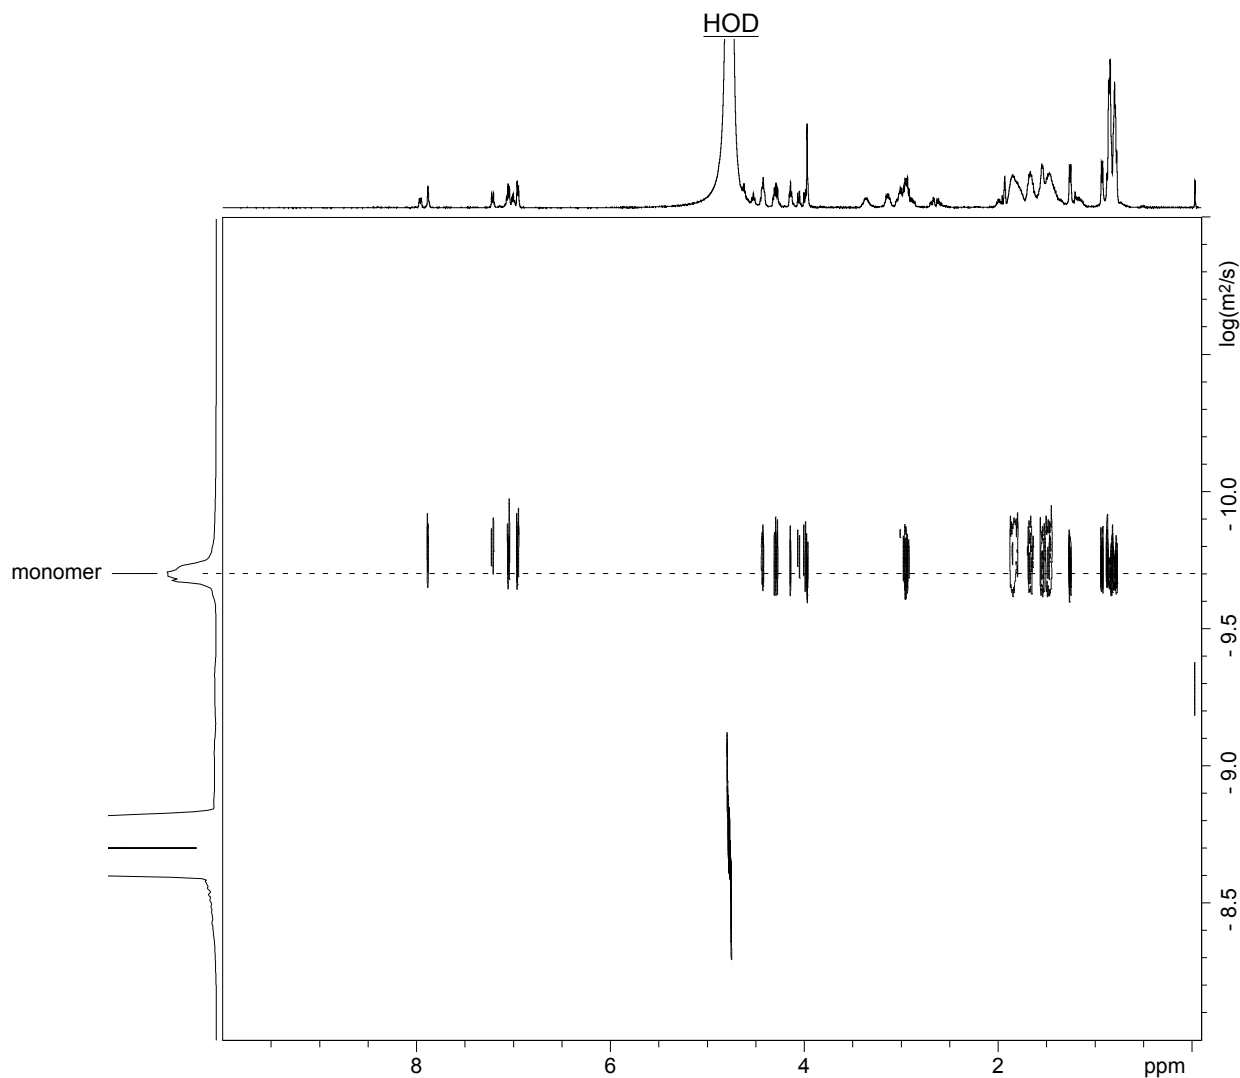

Calculations for macrocyclic  $\beta$ -sheet peptide **1Cit** at 1 mM

$$D_{\text{HOD}} = 19.0 \times 10^{-10} \text{ m}^2/\text{s} \text{ }^a$$

$$\log(D_{\text{HOD}}) = -8.721$$

$$D_{\text{monomer}} : \log(D) = -9.700; D = 10^{-9.700} = 20.0 \pm 2.0 \times 10^{-11} \text{ m}^2/\text{s}$$

<sup>a</sup>Longworth, L. G. *J. Phys. Chem.* **1960**, *64*, 1914–1917.

$^1\text{H}$  NMR DOSY of macrocyclic  $\beta$ -sheet peptide **1Cit** at 500 MHz and 298 K  
2 mM in 100 mM deuterioacetate buffer in  $\text{D}_2\text{O}$

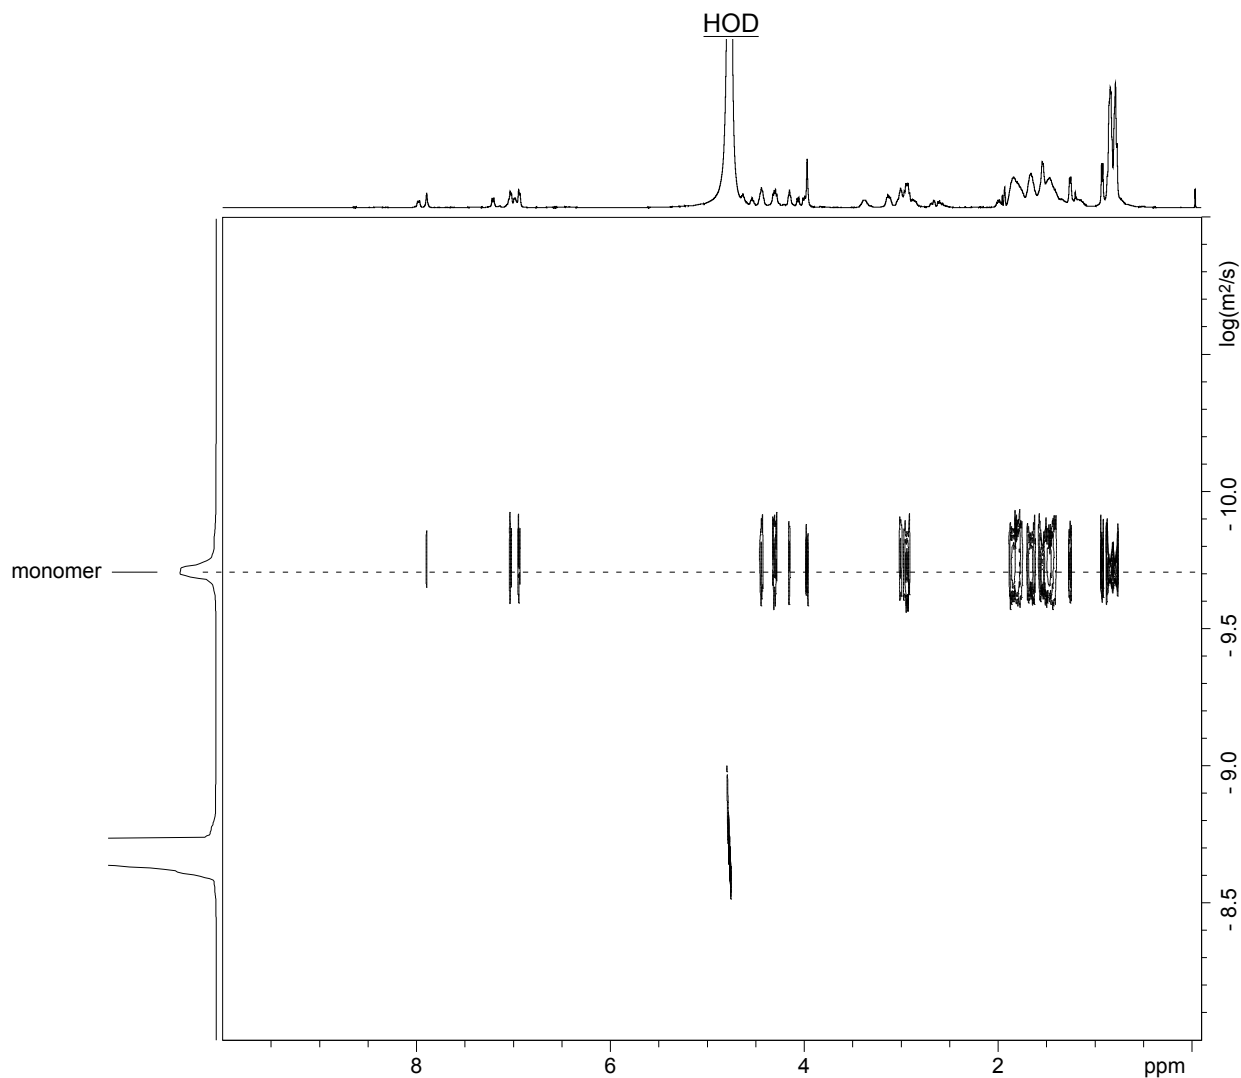

Calculations for macrocyclic  $\beta$ -sheet peptide **1Cit** at 2 mM

$$D_{\text{HOD}} = 19.0 \times 10^{-10} \text{ m}^2/\text{s} \text{ }^a$$

$$\log(D_{\text{HOD}}) = -8.721$$

$$D_{\text{monomer}} : \log(D) = -9.723; D = 10^{-9.723} = 18.9 \pm 1.2 \times 10^{-11} \text{ m}^2/\text{s}$$

<sup>a</sup>Longworth, L. G. *J. Phys. Chem.* **1960**, *64*, 1914–1917.

$^1\text{H}$  NMR DOSY of macrocyclic  $\beta$ -sheet peptide **1Cit** at 500 MHz and 298 K  
4 mM in 100 mM deuterioacetate buffer in  $\text{D}_2\text{O}$

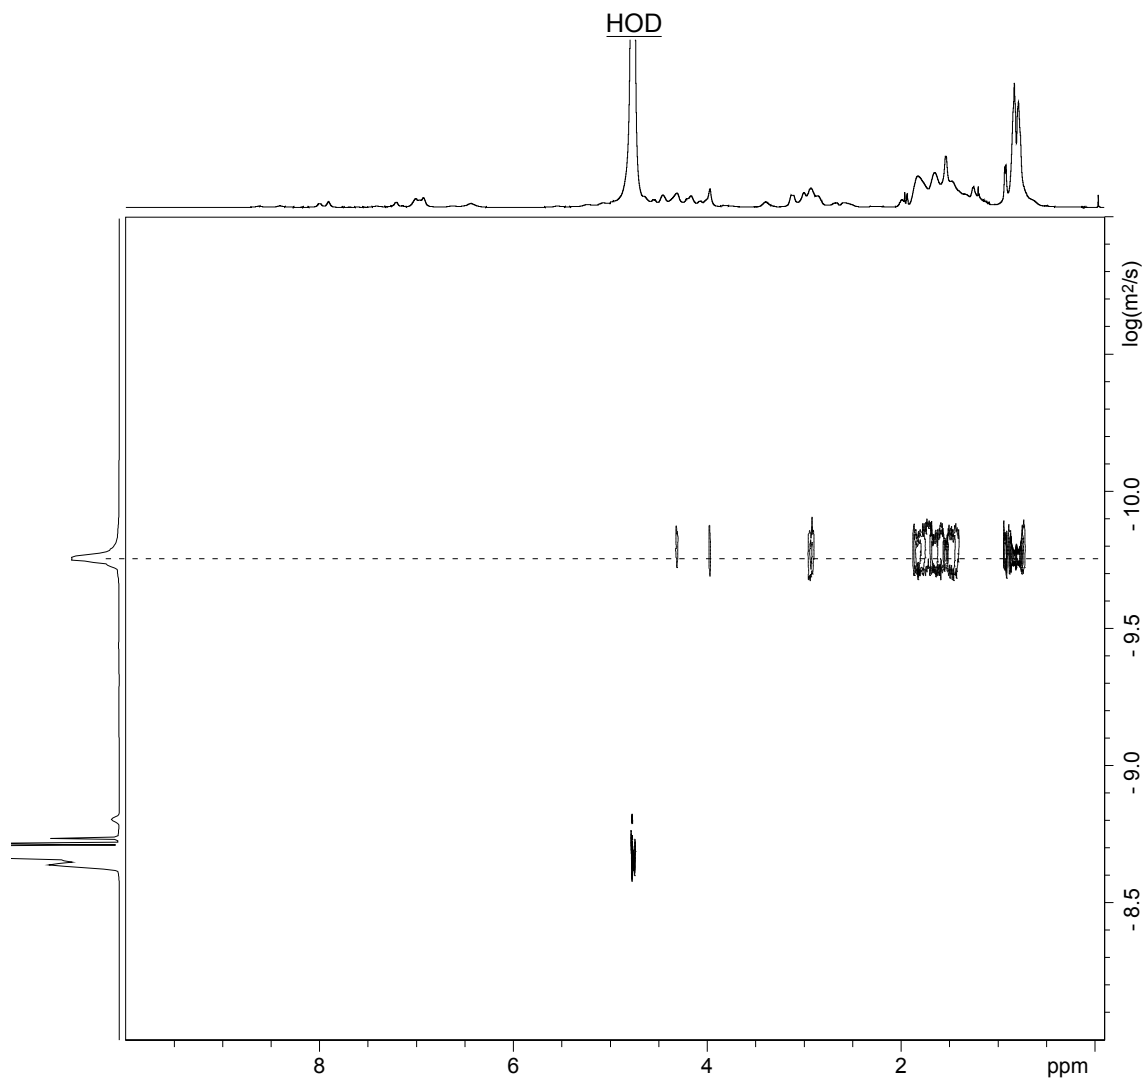

Calculations for macrocyclic  $\beta$ -sheet peptide **1Cit** at 4 mM

$$D_{\text{HOD}} = 19.0 \times 10^{-10} \text{ m}^2/\text{s} \text{ }^a$$

$$\log(D_{\text{HOD}}) = -8.721$$

$$D_{\text{monomer}} : \log(D) = -9.759; D = 10^{-9.759} = 17.4 \pm 1.2 \times 10^{-11} \text{ m}^2/\text{s}$$

<sup>a</sup>Longworth, L. G. *J. Phys. Chem.* **1960**, *64*, 1914–1917.

$^1\text{H}$  NMR DOSY of macrocyclic  $\beta$ -sheet peptide **1Cit** at 500 MHz and 298 K  
8 mM in 100 mM deuterioacetate buffer in  $\text{D}_2\text{O}$

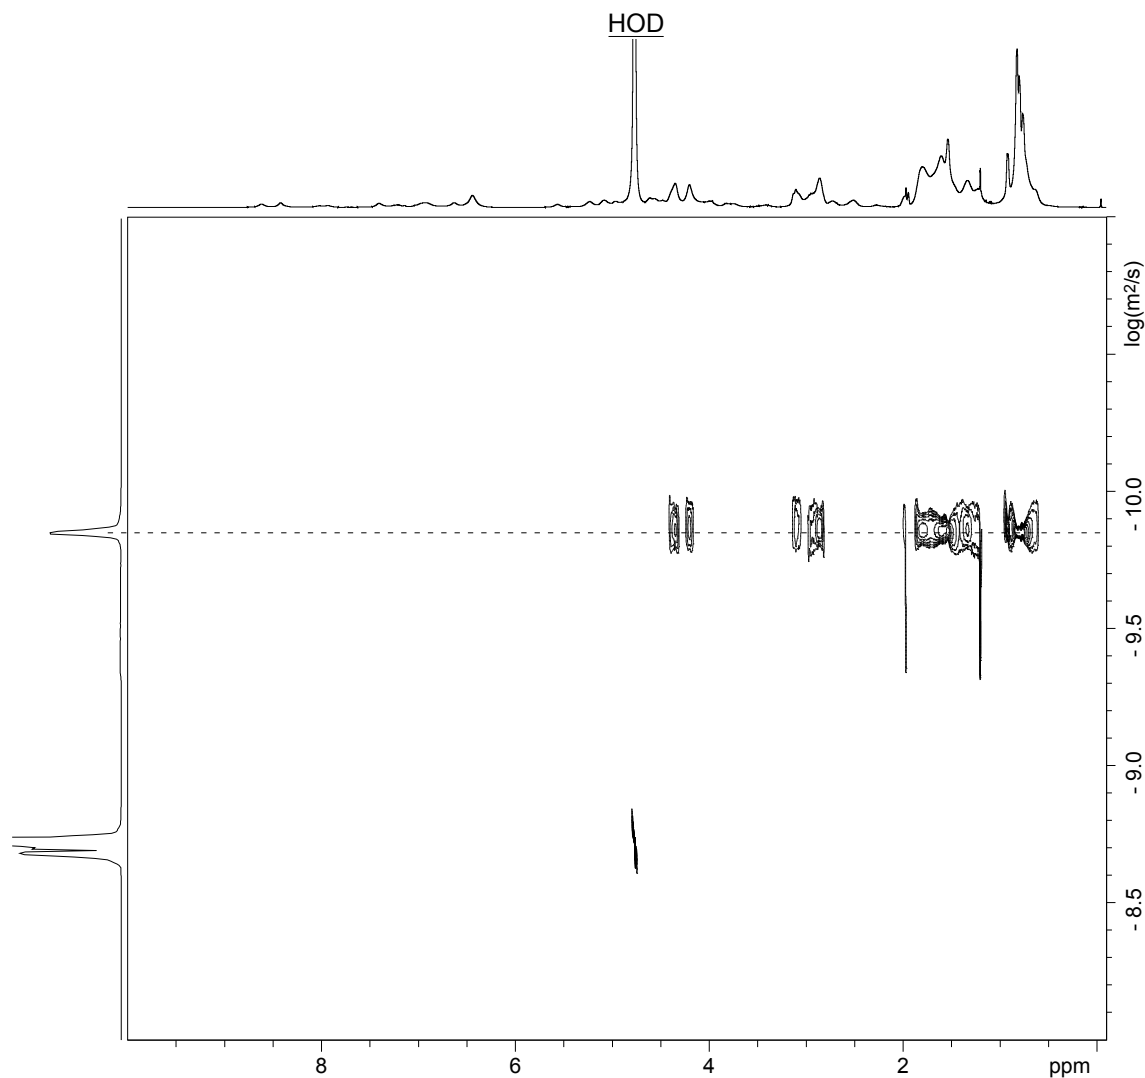

Calculations for macrocyclic  $\beta$ -sheet peptide **1Cit** at 8 mM

$$D_{\text{HOD}} = 19.0 \times 10^{-10} \text{ m}^2/\text{s} \text{ }^a$$

$$\log(D_{\text{HOD}}) = -8.721$$

$$D_{\text{monomer}} : \log(D) = -9.849; D = 10^{-9.849} = 14.2 \pm 0.3 \times 10^{-11} \text{ m}^2/\text{s}$$

<sup>a</sup>Longworth, L. G. *J. Phys. Chem.* **1960**, *64*, 1914–1917.

$^1\text{H}$  NMR DOSY of macrocyclic  $\beta$ -sheet peptide **1Cit** at 500 MHz and 298 K  
16 mM in 100 mM deuterioacetate buffer in  $\text{D}_2\text{O}$

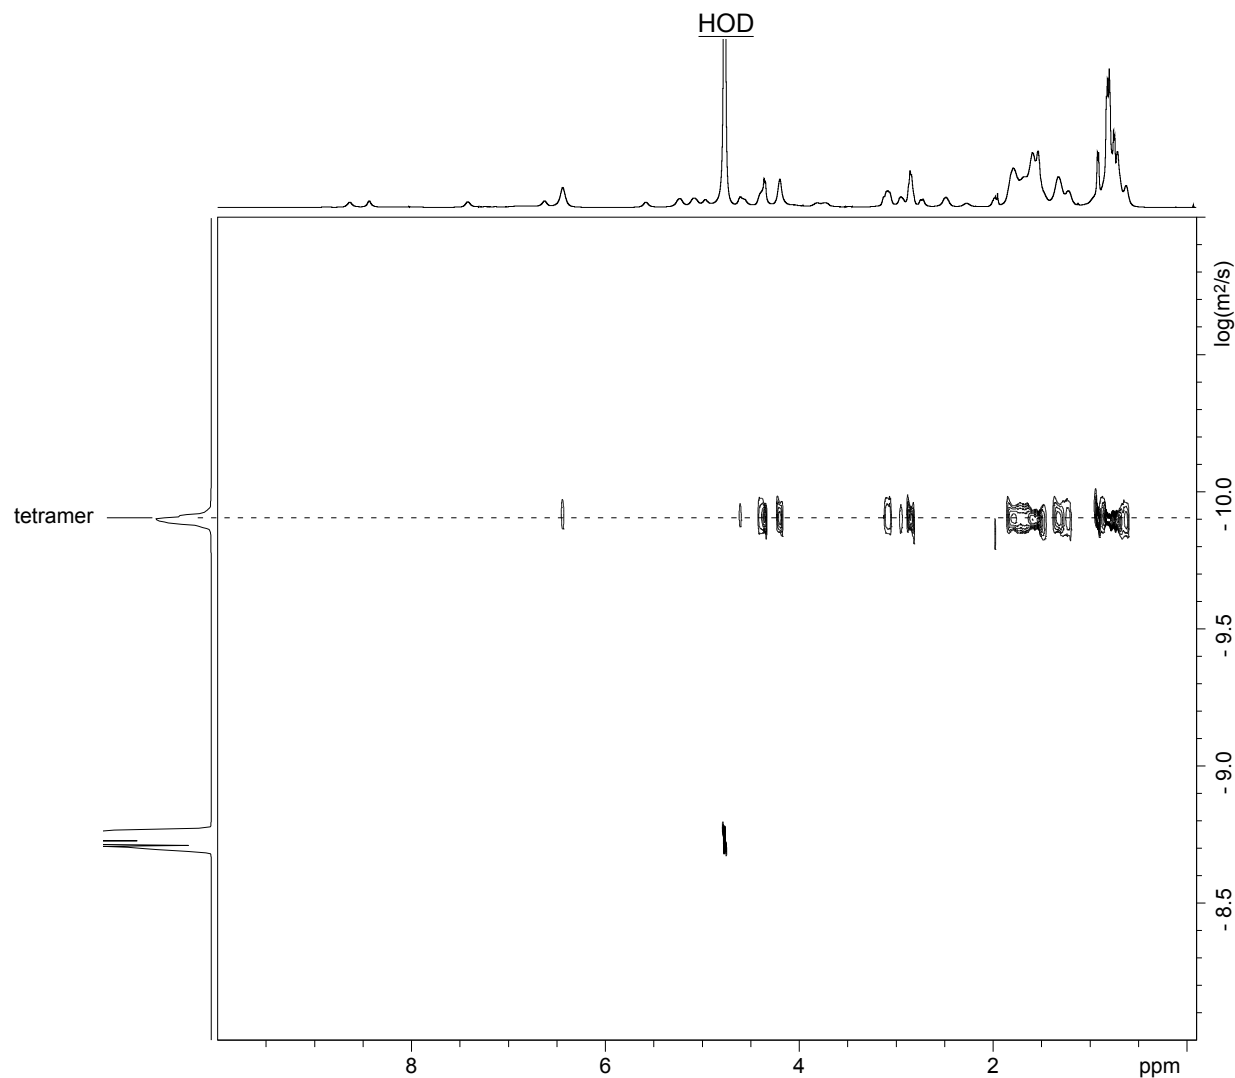

Calculations for macrocyclic  $\beta$ -sheet peptide **1Cit** at 16 mM

$$D_{\text{HOD}} = 19.0 \times 10^{-10} \text{ m}^2/\text{s} \text{ }^a$$

$$\log(D_{\text{HOD}}) = -8.721$$

$$D_{\text{monomer}} : \log(D) = -9.905; D = 10^{-9.905} = 12.4 \pm 0.3 \times 10^{-11} \text{ m}^2/\text{s}$$

<sup>a</sup>Longworth, L. G. *J. Phys. Chem.* **1960**, *64*, 1914–1917.



# RP-HPLC of Macrocytic $\beta$ -Sheet **2**<sub>Cit</sub>

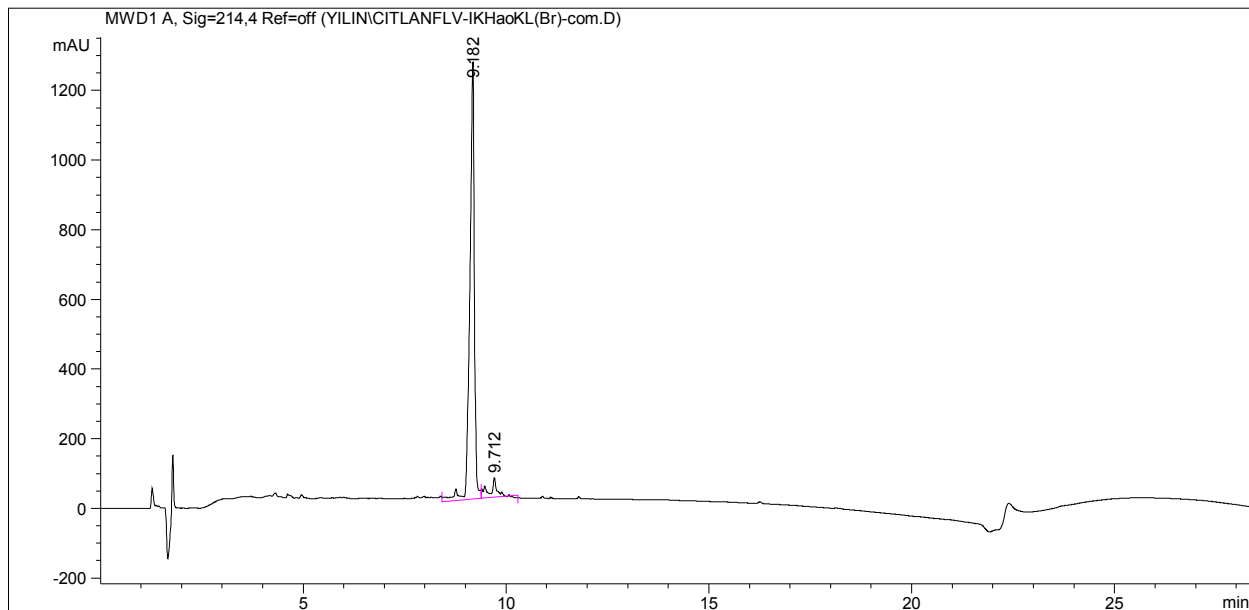

| Peak # | RetTime [min] | Type | Width [min] | Area mAU*s | Height [mAU] | Area %  |
|--------|---------------|------|-------------|------------|--------------|---------|
| 1      | 9.182         | MF   | 0.1294      | 9766.9707  | 1258.4011    | 93.6334 |
| 2      | 9.712         | FM   | 0.1955      | 664.1050   | 56.6224      | 6.3666  |

**column:** Aeris XB-C18 2.6 $\mu$   
**dimensions:** 150 mm x 4.6 mm  
**mobile phase:** A: H<sub>2</sub>O, 0.1% TFA  
 B: CH<sub>3</sub>CN, 0.1% TFA  
**gradient:** A/B (95:5) to (0:100) in 20 min  
**flow rate:** 1.0 mL/min  
**detection:** VWD, wavelength = 214 nm  
**temperature:** 298 K

# MS (ESI) of Macrocytic $\beta$ -Sheet **2**<sub>Cit</sub>

yilinw9\_cittanflv-ikhaokl(br)-1 20 (0.367) Sm (Md, 3.00); Cm (2:55)

TOF MS ES+  
1.60e4

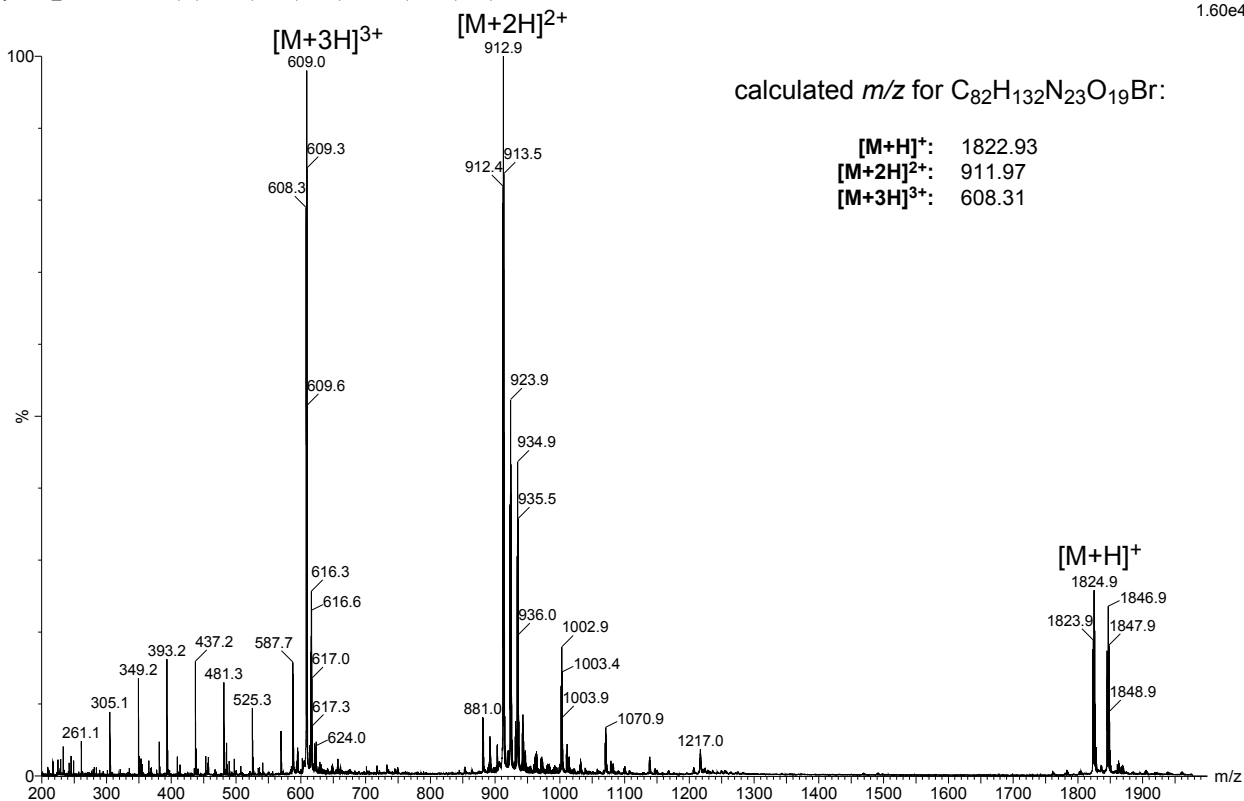

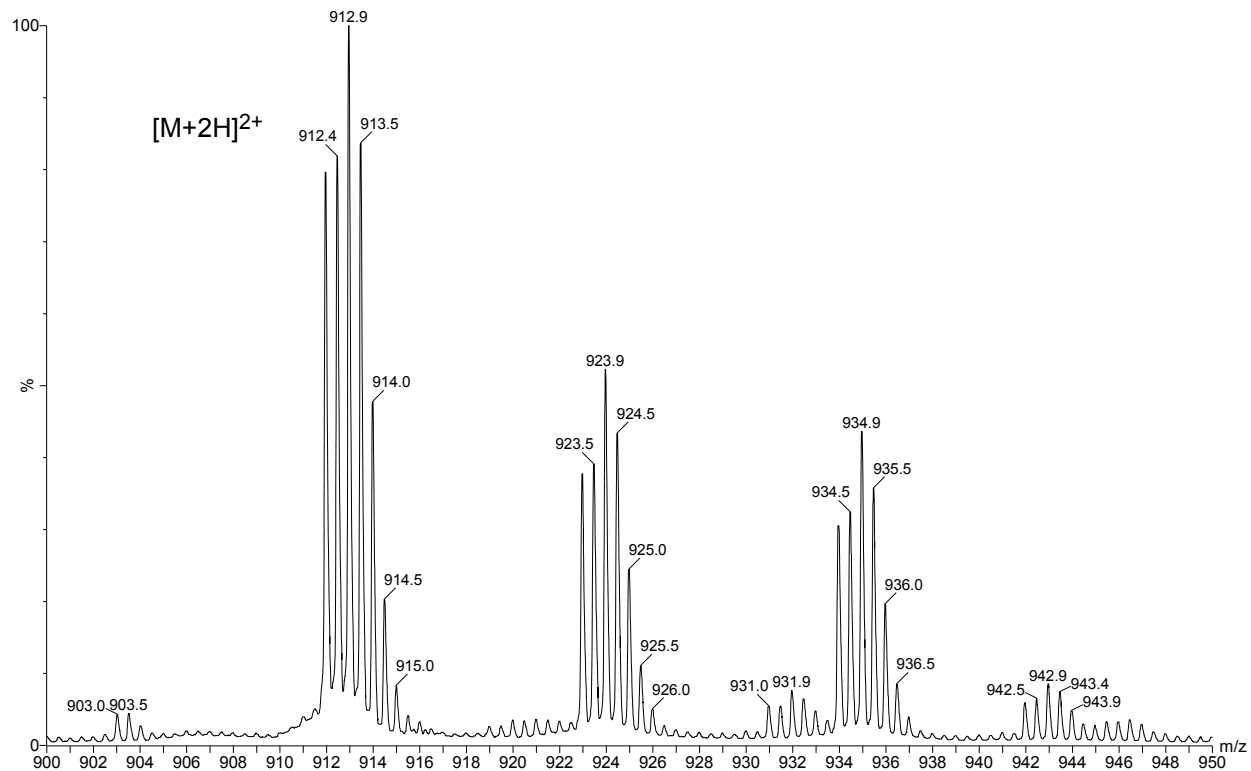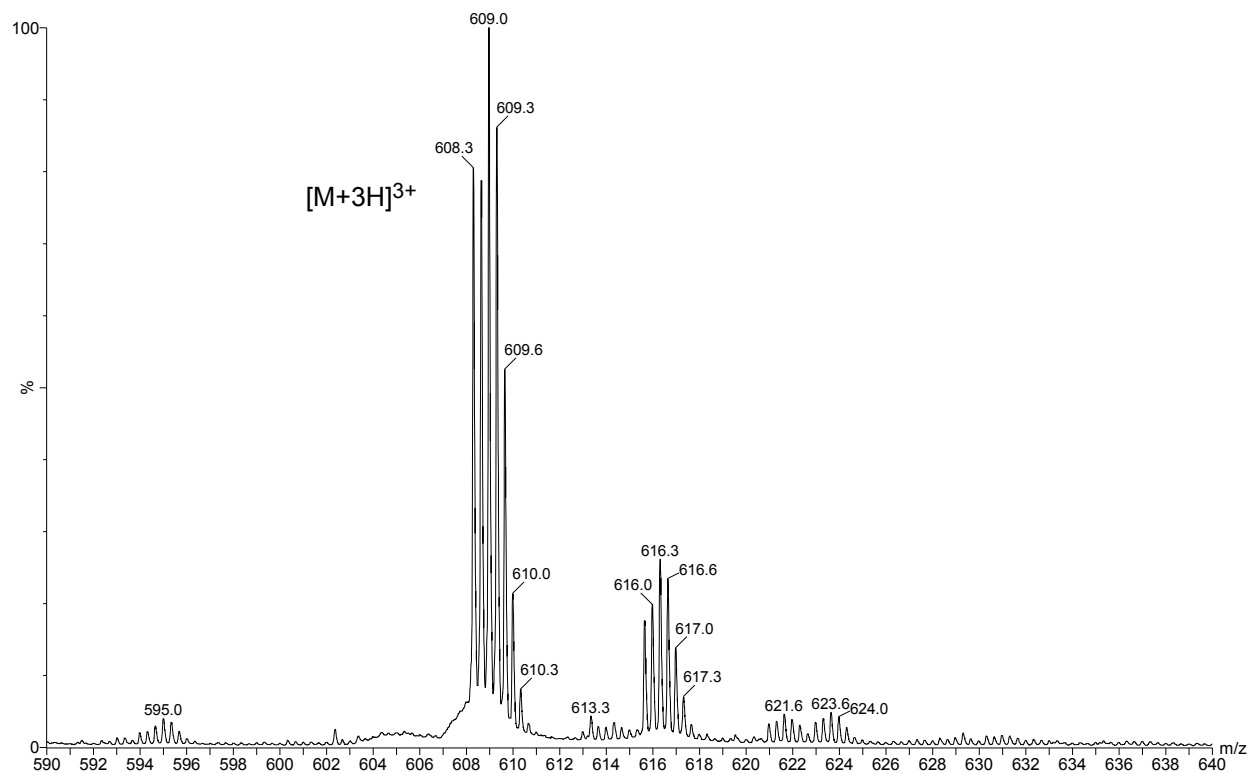

**<sup>1</sup>H NMR of macrocyclic β-sheet peptide 2cit, 1 mM in 100 mM deuterioacetate buffer in D<sub>2</sub>O at 500 MHz and 298 K**

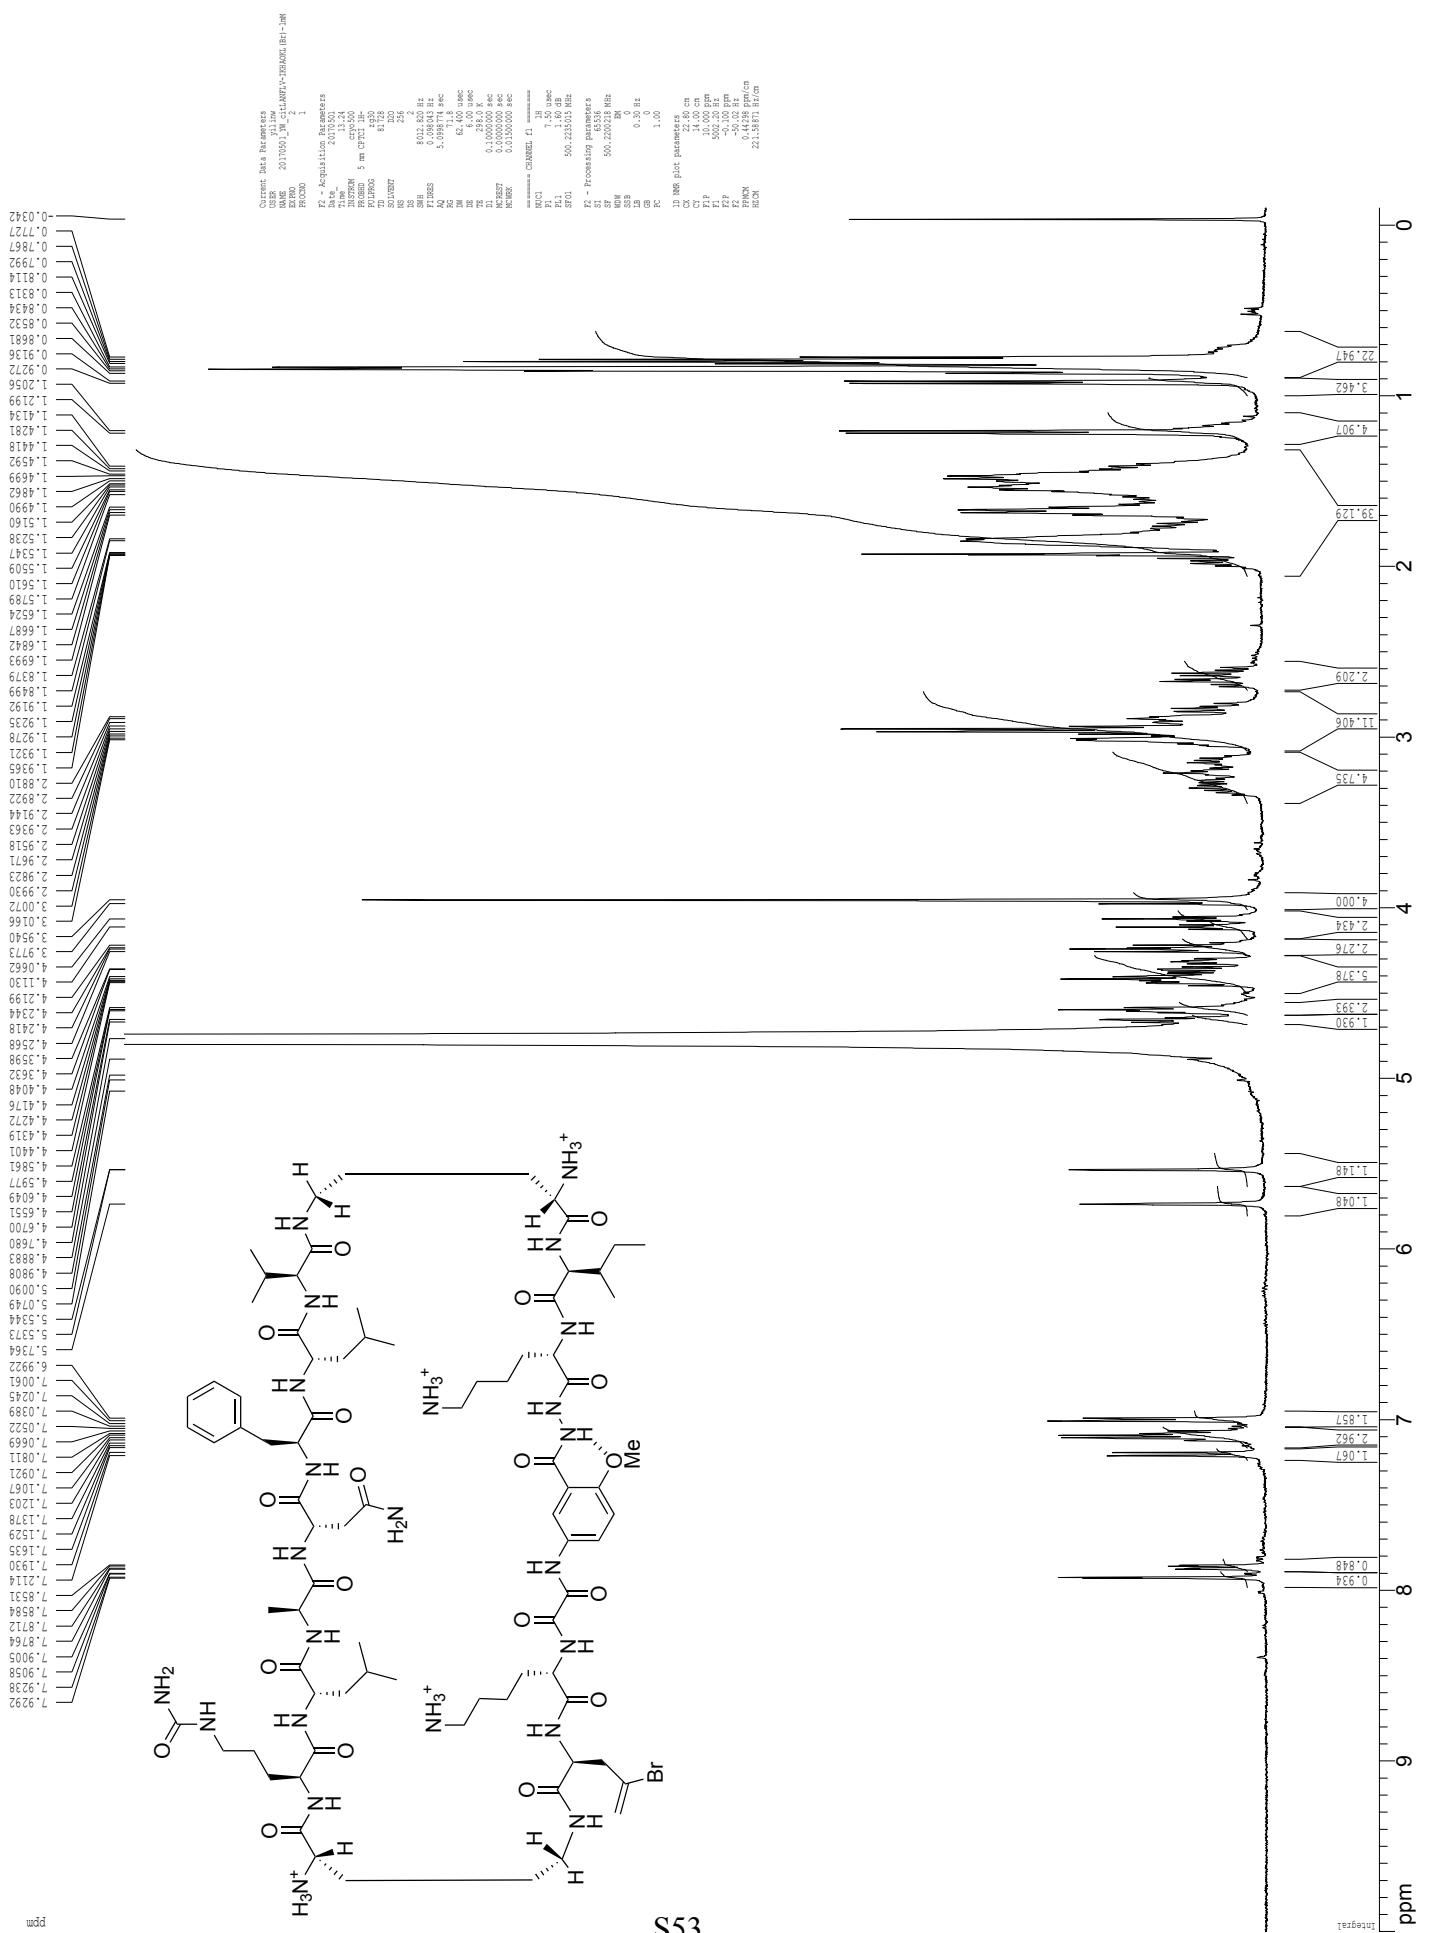



**<sup>1</sup>H NMR of macrocyclic β-sheet peptide 2cit, 1 mM in 100 mM deuterioacetate buffer in D<sub>2</sub>O at 500 MHz and 298 K**

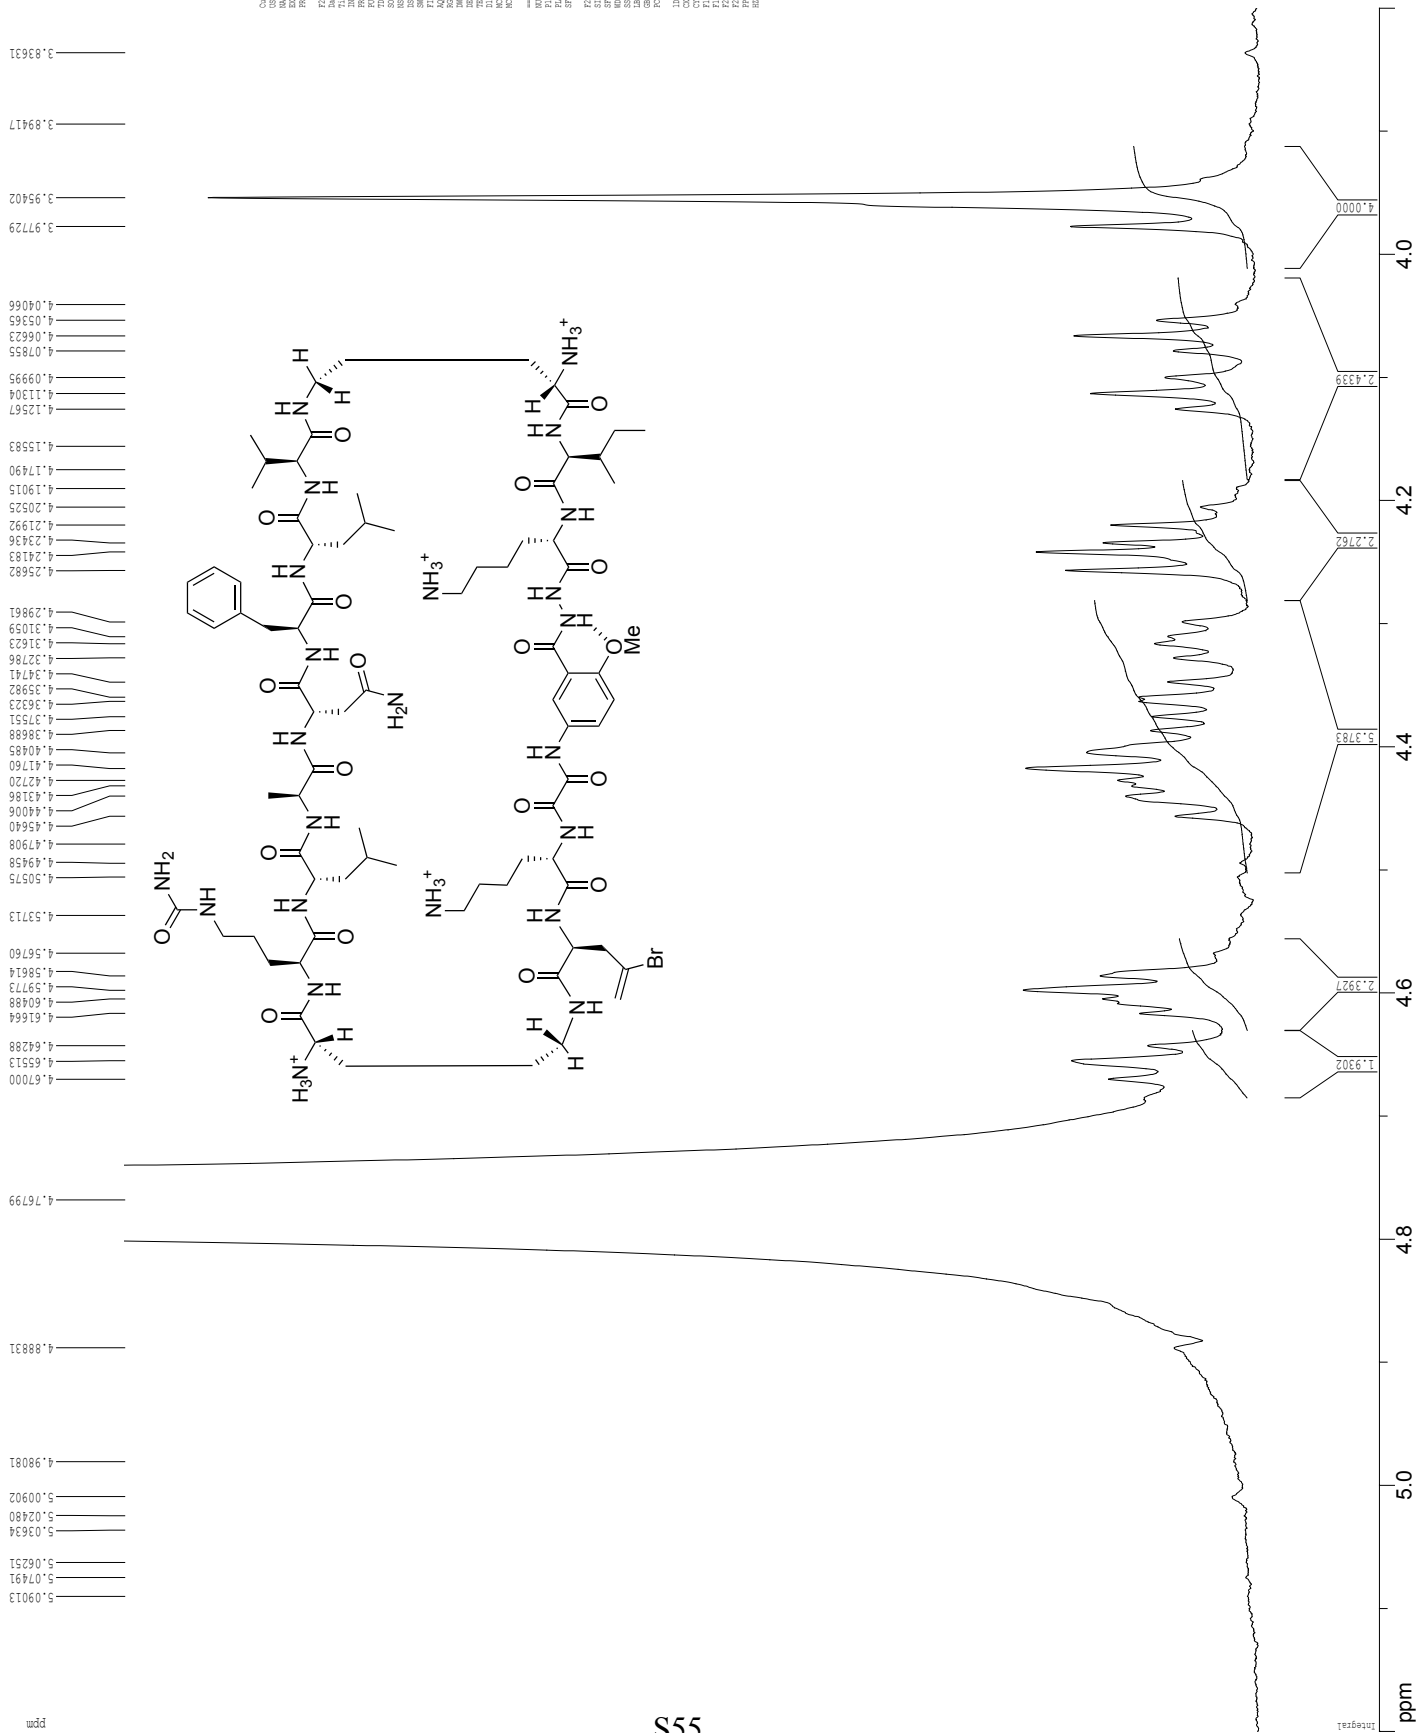

Current Date Parameters  
 USER 2017001\_W\_C14M1T1C16R04M1L1-2M  
 NAME 2017001\_W\_C14M1T1C16R04M1L1-2M  
 PROBO 1  
 F2 - Acquisition Parameters  
 Date\_ 20170101  
 Time\_ 10:00:00  
 INSTRUM cpd400  
 PROCNO 1  
 F2PRG1 2D  
 AQ 300  
 F2 300 MHz  
 P1 12.00  
 PL1 0.00  
 SFO1 500.1362610 MHz  
 F2 - Processing parameters  
 SI 32768  
 SF 500.1362610 MHz  
 W 65536  
 LB 3.00  
 GB 0  
 PC 1.00  
 TO 088 plot parameters  
 CX 22.80 cm  
 CY 1.00 cm  
 F1 5.2000 ppm  
 F2 2601.14 Hz  
 F3 1000.54 Hz  
 F4 1000.54 Hz  
 F5 1000.54 Hz  
 F6 1000.54 Hz  
 F7 1000.54 Hz



<sup>1</sup>H NMR of macrocyclic β-sheet peptide 2cit, 1 mM in 100 mM deuterioacetate buffer in D<sub>2</sub>O at 500 MHz and 298 K

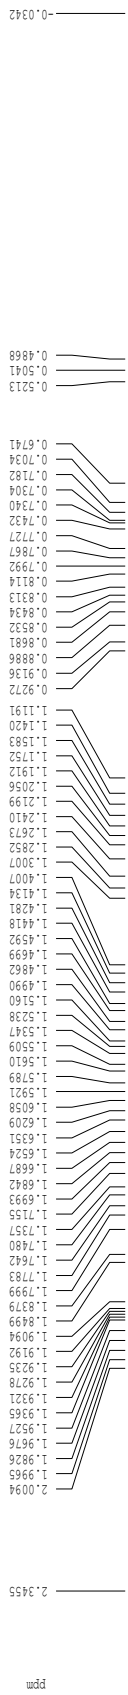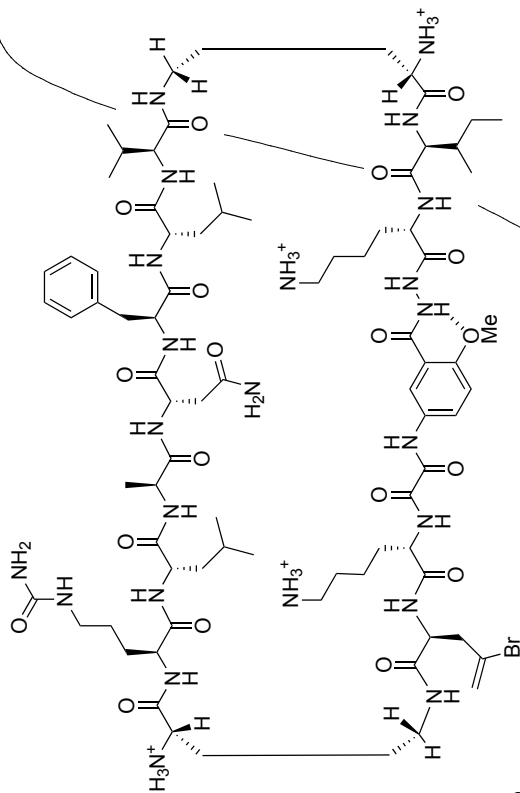

Current Data Parameters  
 USER 2017001\_W\_CITLMBL100MMADEUHEI-2M  
 NAME 2017001\_W\_CITLMBL100MMADEUHEI-2M  
 PROBN 1  
 F2 - Acquisition Parameters  
 Date\_ 20171001  
 Time 08:57:00  
 INSTRUM cpd500  
 PROCESSOR 2.0.10  
 PULPROG zgpg30  
 ACQPROG 300  
 F2 - Processing parameters  
 SI 32768  
 SF 500.1362618 MHz  
 DS 4  
 AS 32  
 SC 0.30 Hz  
 RC 1.00  
 10 NMR pit parameters  
 CR 22.80 cm  
 PI 1.500 ppm  
 F1 120.15 Hz  
 F2 -50.02 Hz  
 SFO 0.714364 ppm/cm  
 SFO2 0.714364 ppm/cm

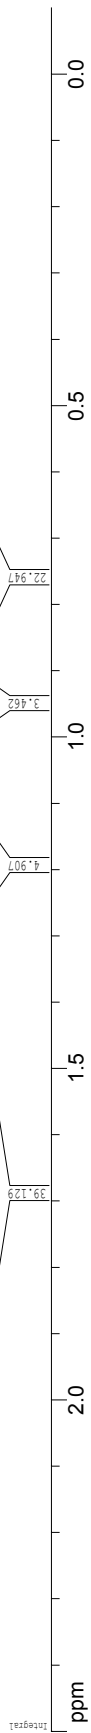

Supplement: NIHMS1630616-supplement-SI_pdf.pdf [file NIHMS1630616-supplement-SI_pdf.pdf]
